# Supplementary material for: Synthesis of quinoxalines and assessment of their inhibitory effects against human non-small-cell lung cancer cells
Source: Royal Society of Chemistry journal article supplement (doi:10.1039/d4ra04453c), 2024-01-01
Supplement: d4ra04453c1.pdf [file d4ra04453c1.pdf]

## Supporting materials

### Synthesis of quinoxalines and assessment of their inhibitory effects against human non-small-cell lung cancer cells

Jia-Hua Liang,<sup>a</sup> Shu-Tse Cho,<sup>b</sup> Tzenge-Lien Shih,<sup>\*b</sup> and Jih-Jung Chen<sup>\*acde</sup>

- a. *Institute of Traditional Medicine, National Yang Ming Chiao Tung University, Taipei 112304, Taiwan*
- b. *Department of Chemistry, Tamkang University, 251301 Tamsui Dist., New Taipei City, Taiwan*
- c. *Department of Pharmacy, School of Pharmaceutical Sciences, National Yang Ming Chiao Tung University, Taipei 112304, Taiwan*
- d. *Department of Medical Research, China Medical University Hospital, China Medical University, Taichung 404333, Taiwan*
- e. *Traditional Herbal Medicine Research Center, Taipei Medical University Hospital, Taipei 110301, Taiwan*

\* Correspondence: [jjungchen@nycu.edu.tw](mailto:jjungchen@nycu.edu.tw) (J.-J.C.)\*; Tel.: +886-2-2826-7195 (J.-J.C.)\*; Fax: +886-2-2823-2940(J.-J.C.)\*; [tlshih@mail.tku.edu.tw](mailto:tlshih@mail.tku.edu.tw) (T.-L.S.)\*; Tel.: +886-2-8631-5024 (T.-L.S.)\*

|                                                                                          |     |
|------------------------------------------------------------------------------------------|-----|
| <sup>1</sup> H NMR (600 MHz, CDCl <sub>3</sub> ) for compound <b>4a</b> .....            | S4  |
| <sup>13</sup> C NMR (150 MHz, CDCl <sub>3</sub> ) for compound <b>4a</b> .....           | S5  |
| <sup>1</sup> H NMR (600 MHz, CDCl <sub>3</sub> ) for compound <b>4b</b> .....            | S6  |
| <sup>13</sup> C NMR (150 MHz, CDCl <sub>3</sub> ) for compound <b>4b</b> .....           | S7  |
| <sup>1</sup> H NMR (600 MHz, CDCl <sub>3</sub> ) for compound <b>4c</b> .....            | S8  |
| <sup>13</sup> C NMR (150 MHz, CDCl <sub>3</sub> ) for compound <b>4c</b> .....           | S9  |
| <sup>1</sup> H NMR (600 MHz, CDCl <sub>3</sub> ) for compound <b>4d</b> .....            | S10 |
| <sup>13</sup> C NMR (150 MHz, CDCl <sub>3</sub> ) for compound <b>4d</b> .....           | S11 |
| <sup>1</sup> H NMR (600 MHz, CDCl <sub>3</sub> ) for compound <b>4e</b> .....            | S12 |
| <sup>13</sup> C NMR (150 MHz, CDCl <sub>3</sub> ) for compound <b>4e</b> .....           | S13 |
| <sup>1</sup> H NMR (600 MHz, CDCl <sub>3</sub> ) for compound <b>4f</b> .....            | S14 |
| <sup>1</sup> H NMR (600 MHz, CDCl <sub>3</sub> ) for compound <b>4g</b> .....            | S15 |
| <sup>13</sup> C NMR (150 MHz, CDCl <sub>3</sub> ) for compound <b>4g</b> .....           | S16 |
| <sup>1</sup> H NMR (600 MHz, CDCl <sub>3</sub> ) for compound <b>4h</b> .....            | S17 |
| <sup>13</sup> C NMR (150 MHz, CDCl <sub>3</sub> ) for compound <b>4h</b> .....           | S18 |
| <sup>1</sup> H NMR (600 MHz, CDCl <sub>3</sub> ) for compound <b>4i</b> .....            | S19 |
| <sup>13</sup> C NMR (150 MHz, CDCl <sub>3</sub> ) for compound <b>4i</b> .....           | S20 |
| <sup>1</sup> H NMR (600 MHz, CDCl <sub>3</sub> ) for compound <b>4j</b> .....            | S21 |
| <sup>13</sup> C NMR (150 MHz, CDCl <sub>3</sub> ) for compound <b>4j</b> .....           | S22 |
| <sup>1</sup> H NMR (600 MHz, CDCl <sub>3</sub> ) for compound <b>4k</b> .....            | S23 |
| <sup>13</sup> C NMR (150 MHz, CDCl <sub>3</sub> ) for compound <b>4k</b> .....           | S24 |
| <sup>1</sup> H NMR (600 MHz, CDCl <sub>3</sub> ) for compound <b>4l</b> .....            | S25 |
| <sup>13</sup> C NMR (150 MHz, CDCl <sub>3</sub> ) for compound <b>4l</b> .....           | S26 |
| <sup>1</sup> H NMR (600 MHz, DMSO- <i>d</i> <sub>6</sub> ) for compound <b>4m</b> .....  | S27 |
| <sup>13</sup> C NMR (150 MHz, DMSO- <i>d</i> <sub>6</sub> ) for compound <b>4m</b> ..... | S28 |
| <sup>1</sup> H NMR (600 MHz, CDCl <sub>3</sub> ) for compound <b>5a</b> .....            | S29 |
| <sup>13</sup> C NMR (150 MHz, CDCl <sub>3</sub> ) for compound <b>5a</b> .....           | S30 |
| <sup>1</sup> H NMR (600 MHz, CDCl <sub>3</sub> ) for compound <b>5b</b> .....            | S31 |

|                                                                                          |     |
|------------------------------------------------------------------------------------------|-----|
| <sup>13</sup> C NMR (150 MHz, CDCl <sub>3</sub> ) for compound <b>5b</b> .....           | S32 |
| <sup>1</sup> H NMR (600 MHz, CDCl <sub>3</sub> ) for compound <b>5c</b> .....            | S33 |
| <sup>13</sup> C NMR (150 MHz, CDCl <sub>3</sub> ) for compound <b>5c</b> .....           | S34 |
| <sup>1</sup> H NMR (600 MHz, CDCl <sub>3</sub> ) for compound <b>5d</b> .....            | S35 |
| <sup>13</sup> C NMR (150 MHz, CDCl <sub>3</sub> ) for compound <b>5d</b> .....           | S36 |
| <sup>1</sup> H NMR (600 MHz, CDCl <sub>3</sub> ) for compound <b>5e</b> .....            | S37 |
| <sup>13</sup> C NMR (150 MHz, CDCl <sub>3</sub> ) for compound <b>5e</b> .....           | S38 |
| <sup>1</sup> H NMR (600 MHz, CDCl <sub>3</sub> ) for compound <b>5f</b> .....            | S39 |
| <sup>13</sup> C NMR (150 MHz, CDCl <sub>3</sub> ) for compound <b>5f</b> .....           | S40 |
| <sup>1</sup> H NMR (600 MHz, CDCl <sub>3</sub> ) for compound <b>5g</b> .....            | S41 |
| <sup>13</sup> C NMR (150 MHz, CDCl <sub>3</sub> ) for compound <b>5g</b> .....           | S42 |
| <sup>1</sup> H NMR (600 MHz, CDCl <sub>3</sub> ) for compound <b>5h</b> .....            | S43 |
| <sup>13</sup> C NMR (150 MHz, CDCl <sub>3</sub> ) for compound <b>5h</b> .....           | S44 |
| <sup>1</sup> H NMR (600 MHz, CDCl <sub>3</sub> ) for compound <b>5i</b> .....            | S45 |
| <sup>13</sup> C NMR (150 MHz, CDCl <sub>3</sub> ) for compound <b>5i</b> .....           | S46 |
| <sup>1</sup> H NMR (600 MHz, CDCl <sub>3</sub> ) for compound <b>5j</b> .....            | S47 |
| <sup>13</sup> C NMR (150 MHz, CDCl <sub>3</sub> ) for compound <b>5j</b> .....           | S48 |
| <sup>1</sup> H NMR (600 MHz, CDCl <sub>3</sub> ) for compound <b>5k</b> .....            | S49 |
| <sup>1</sup> H NMR (600 MHz, CDCl <sub>3</sub> ) for compound <b>5l</b> .....            | S50 |
| <sup>13</sup> C NMR (150 MHz, CDCl <sub>3</sub> ) for compound <b>5l</b> .....           | S51 |
| <sup>1</sup> H NMR (600 MHz, DMSO- <i>d</i> <sub>6</sub> ) for compound <b>5m</b> .....  | S52 |
| <sup>13</sup> C NMR (150 MHz, DMSO- <i>d</i> <sub>6</sub> ) for compound <b>5m</b> ..... | S53 |

<sup>1</sup>H  
 8.153f  
 8.150 JSZ2-144  
 7.835  
 7.829  
 7.812  
 7.705  
 7.702  
 7.690  
 7.687  
 7.557  
 7.552  
 7.532  
 7.260  
 6.630  
 6.624  
 6.616  
 6.512  
 6.509

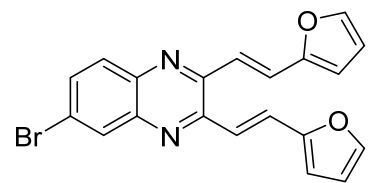

**4a**

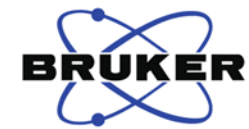

Current Data Parameters  
 NAME JSZ2-144  
 EXPNO 1  
 PROCNO 1

F2 - Acquisition Parameters  
 Date\_ 20220419  
 Time 10.20  
 INSTRUM spect  
 PROBHD 5 mm TXI 1H/D-  
 PULPROG zg30  
 TD 32768  
 SOLVENT CDCl3  
 NS 16  
 DS 0  
 SWH 6313.131 Hz  
 FIDRES 0.192661 Hz  
 AQ 2.5952256 sec  
 RG 2050  
 DW 79.200 usec  
 DE 6.00 usec  
 TE 299.9 K  
 D1 2.0000000 sec  
 TD0 1

----- CHANNEL f1 -----  
 NUC1 1H  
 P1 8.00 usec  
 PL1 0.20 dB  
 PL1W 19.19066429 W  
 SF01 600.1330006 MHz

F2 - Processing parameters  
 SI 32768  
 SF 600.1300108 MHz  
 WDW no  
 SSR 0  
 LB 0 Hz  
 GB 0  
 PC 1.00

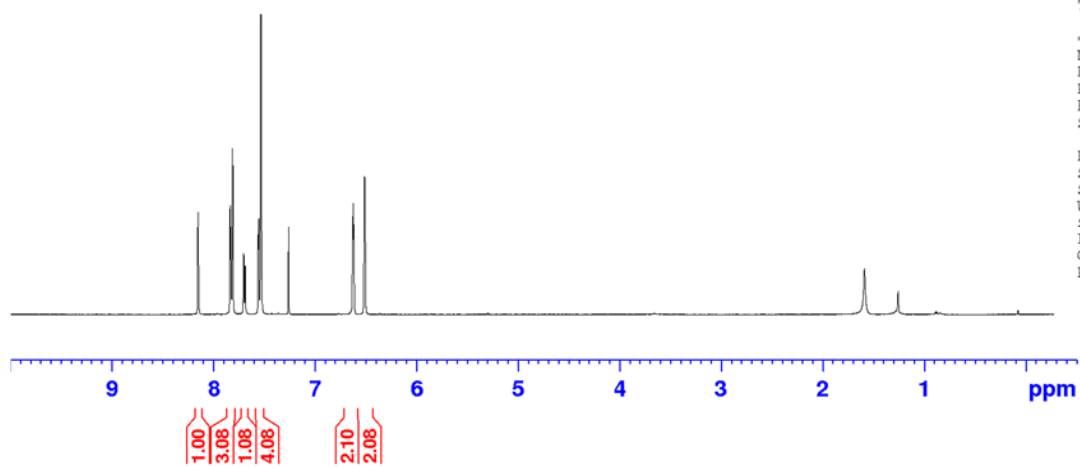

<sup>1</sup>H NMR (600 MHz, CDCl<sub>3</sub>) for compound **4a**

<sup>13</sup>C of JSZ2-144

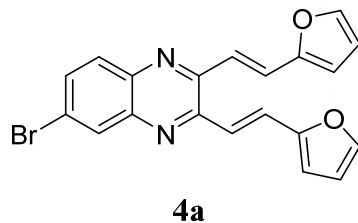

152.87  
152.82  
149.36  
148.94  
143.75  
143.70  
142.11  
140.31  
132.68  
130.88  
129.89  
125.06  
124.79  
123.05  
119.76  
119.66  
113.07  
112.50  
112.28

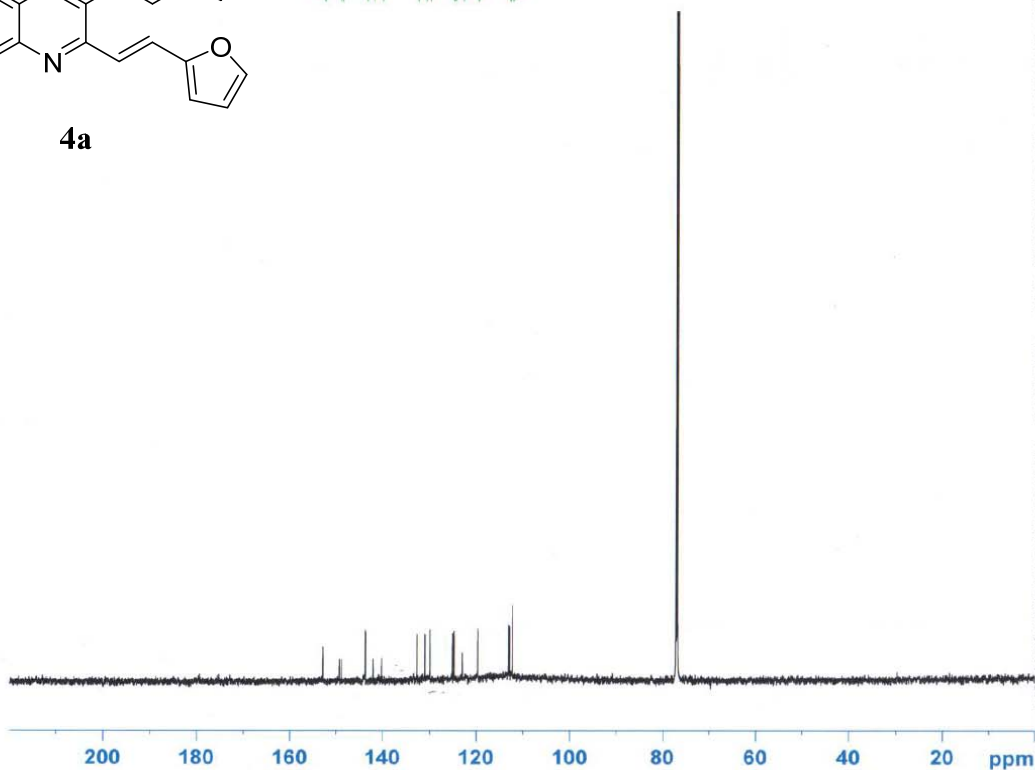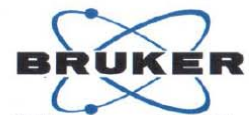

NAME JSZ2-144  
EXPNO 2  
PROCNO 1  
Date\_ 20220419  
Time\_ 10.51  
INSTRUM spect  
PROBHD 5 mm TXI 1H/D-  
PULPROG zgpg30  
TD 65536  
SOLVENT CDCl3  
NS 608  
DS 0  
SWH 34013.605 Hz  
FIDRES 0.519006 Hz  
AQ 0.9634439 sec  
RG 46300  
DW 14.700 usec  
DE 6.00 usec  
TE 300.1 K  
D1 2.4000010 sec  
D11 0.03000000 sec  
TD0 1

===== CHANNEL f1 =====  
NUC1 13C  
P1 10.95 usec  
PL1 -4.00 dB  
PL1W 236.60900879 W  
SFO1 150.9194083 MHz

===== CHANNEL f2 =====  
CPDPRG2 waltz16  
NUC2 1H  
PCPD2 90.00 usec  
PL2 2.00 dB  
PL12 19.00 dB  
PL13 21.00 dB  
PL2W 12.67914581 W  
PL12W 0.25298220 W  
PL13W 0.15962099 W  
SFO2 600.1339008 MHz  
SI 32768  
SF 150.9028108 MHz  
WDW EM  
SSB 0  
LB 3.00 Hz  
GB 0  
PC 1.00

<sup>13</sup>C NMR (150 MHz, CDCl<sub>3</sub>) for compound **4a**

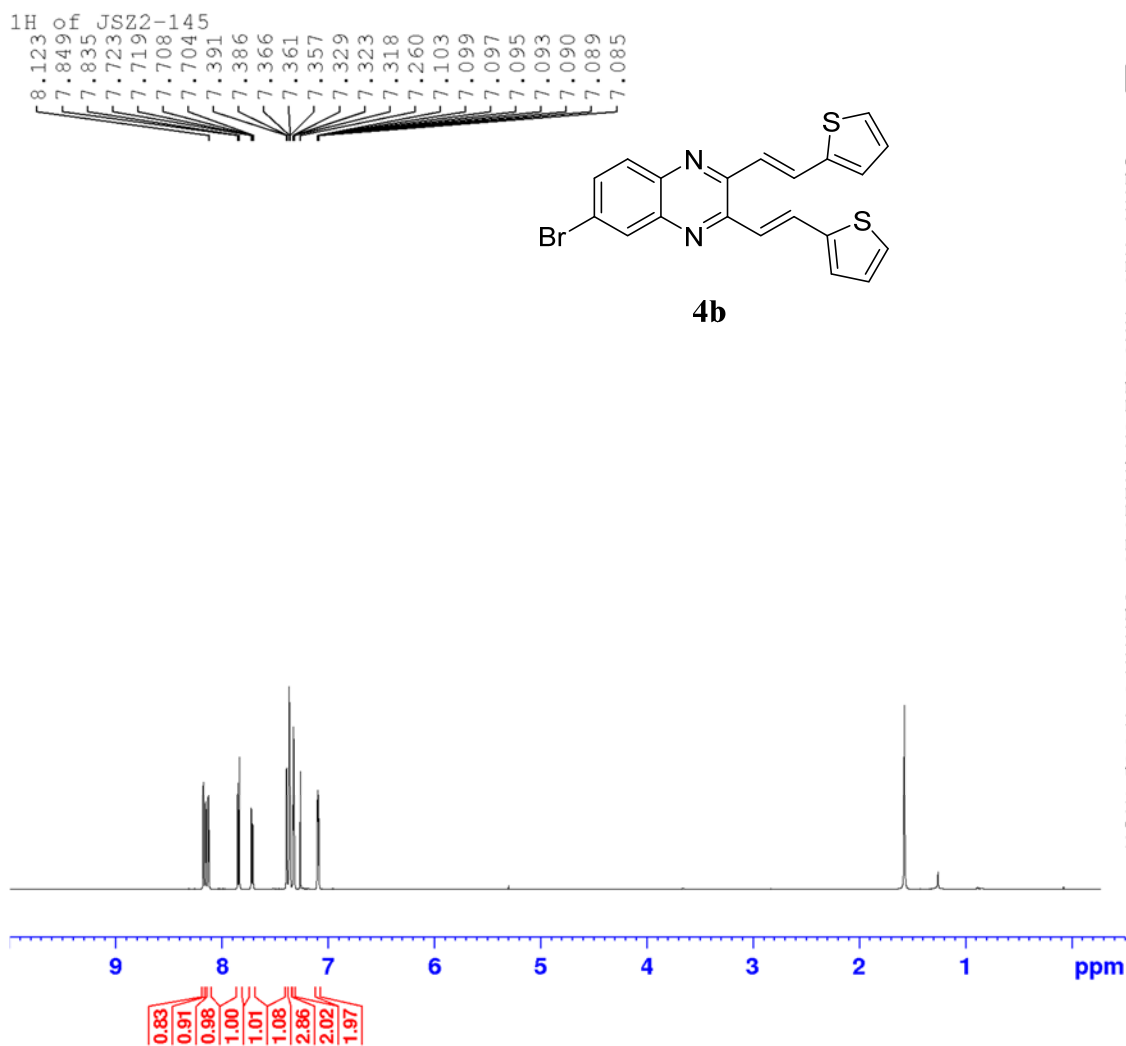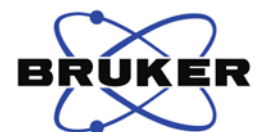

Current Data Parameters  
NAME JSZ2-145  
EXPNO 1  
PROCNO 1

F2 - Acquisition Parameters  
Date\_ 20220420  
Time 17.05  
INSTRUM spect  
PROBHD 5 mm TXI 1H/D-  
PULPROG zg30  
TD 32768  
SOLVENT CDCl3  
NS 16  
DS 0  
SWH 6313.131 Hz  
FIDRES 0.192661 Hz  
AQ 2.5952256 sec  
RG 912  
DW 79.200 usec  
DE 6.00 usec  
TE 300.0 K  
D1 2.0000000 sec  
TD0 1

----- CHANNEL f1 -----  
NUC1 1H  
P1 15.00 usec  
PL1 -0.80 dB  
PL1W 24.15961456 W  
SFO1 600.1330006 MHz

F2 - Processing parameters  
SI 32768  
SF 600.1300108 MHz  
WDW no  
SSB 0  
LB 0 Hz  
GB 0  
PC 1.00

<sup>1</sup>H NMR (600 MHz, CDCl<sub>3</sub>) for compound **4b**

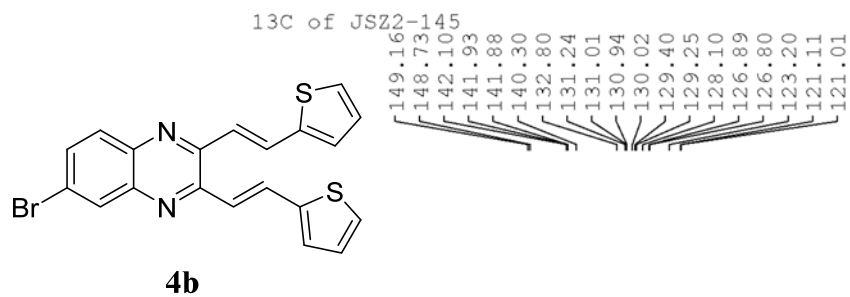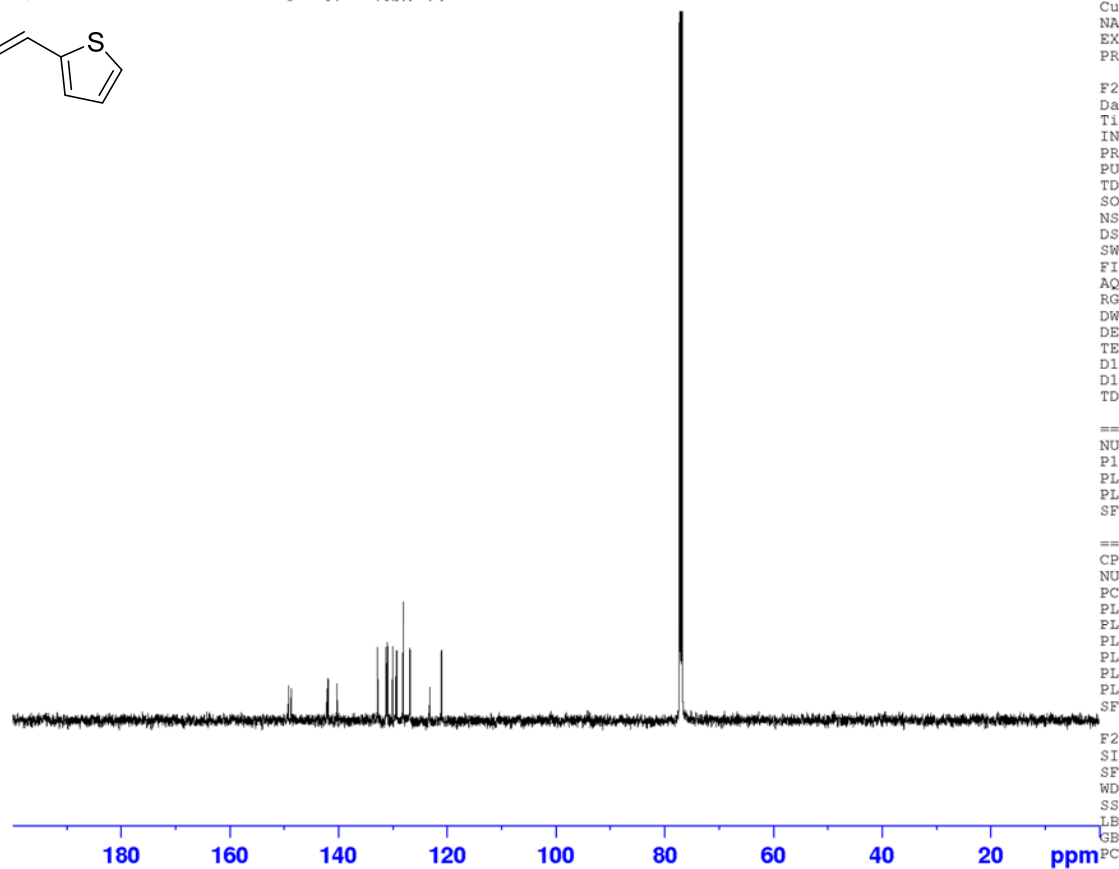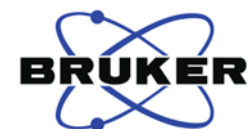

Current Data Parameters  
 NAME JSZ2-145  
 EXPNO 2  
 PROCNO 1

F2 - Acquisition Parameters  
 Date\_ 20220420  
 Time 16.24  
 INSTRUM spect  
 PROBHD 5 mm PABBO BB-  
 PULPROG zgpg30  
 TD 65536  
 SOLVENT CDCl3  
 NS 381  
 DS 0  
 SWH 33333.332 Hz  
 FIDRES 0.508626 Hz  
 AQ 0.9830400 sec  
 RG 46300  
 DW 15.000 usec  
 DE 6.00 usec  
 TE 300.9 K  
 D1 2.40000010 sec  
 D11 0.03000000 sec  
 TD0 1

===== CHANNEL f1 =====  
 NUC1 13C  
 P1 10.00 usec  
 PL1 -1.60 dB  
 PL1W 136.15426636 W  
 SFO1 150.9194083 MHz

===== CHANNEL f2 =====  
 CPDPRG[2] waltz16  
 NUC2 1H  
 PCPD2 90.00 usec  
 PL2 -1.50 dB  
 PL12 13.20 dB  
 PL13 16.20 dB  
 PL2W 28.38507080 W  
 PL12W 0.96181160 W  
 PL13W 0.48204759 W  
 SFO2 600.1339008 MHz

F2 - Processing parameters  
 SI 32768  
 SF 150.9028090 MHz  
 WDW EM  
 SSB 0  
 LB 3.00 Hz  
 GB 0  
 PC 1.00

$^{13}\text{C}$  NMR (150 MHz,  $\text{CDCl}_3$ ) for compound **4b**

1H of JSZ2-167

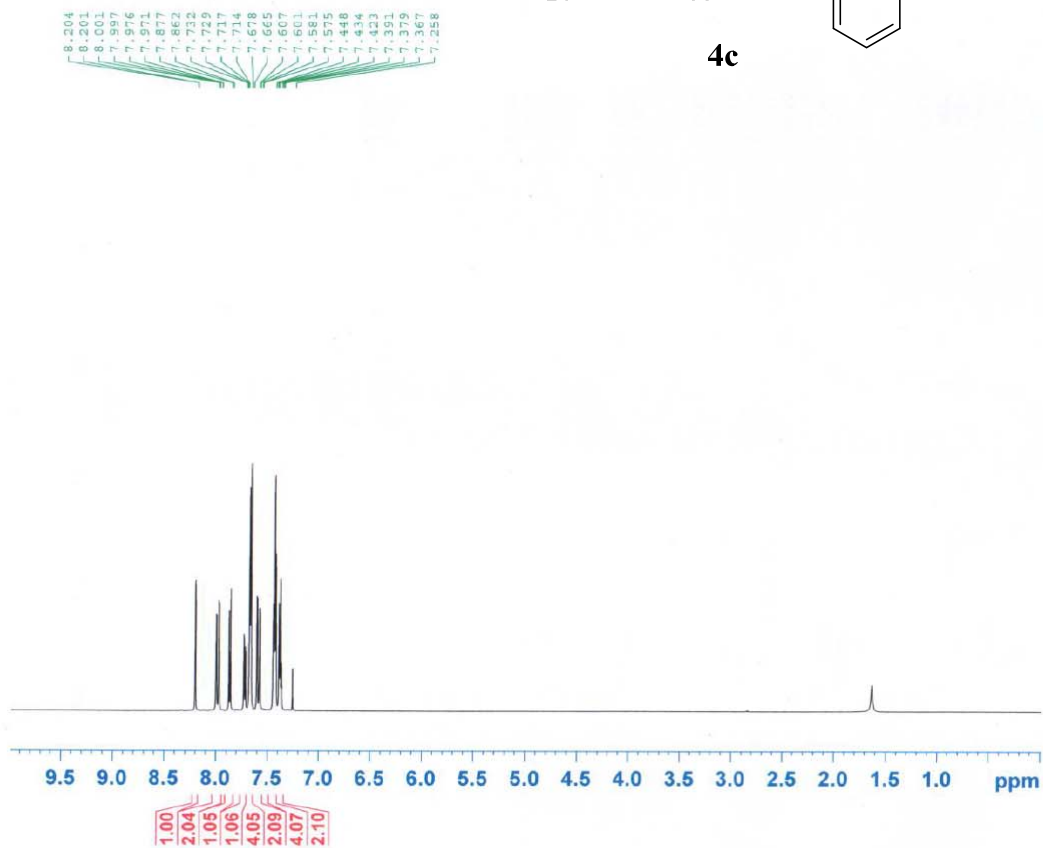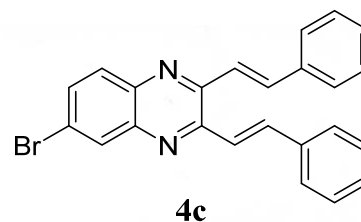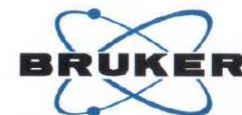

```
NAME JSZ2-167
EXPNO 1
PROCNO 1
Date_ 20210722
Time 9.03
INSTRUM spect
PROBHD 5 mm TXI 1H/D-
PULPROG zg30
TD 32768
SOLVENT CDCl3
NS 1
DS 0
SWH 6009.615 Hz
FIDRES 0.183399 Hz
AQ 2.7264309 sec
RG 456
DW 83.200 usec
DE 6.00 usec
TE 299.9 K
D1 2.00000000 sec
TD0 1
```

```
----- CHANNEL f1 -----
NUC1 1H
P1 8.00 usec
PL1 -0.57 dB
PL1W 22.91342354 W
SFO1 600.1330006 MHz
SI 16384
SF 600.1300120 MHz
WDW no
SSB 0
LB 0.00 Hz
GB 0
PC 1.00
```

<sup>1</sup>H NMR (600 MHz, CDCl<sub>3</sub>) for compound **4c**



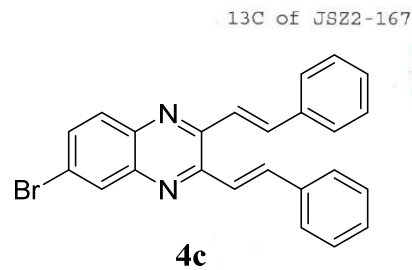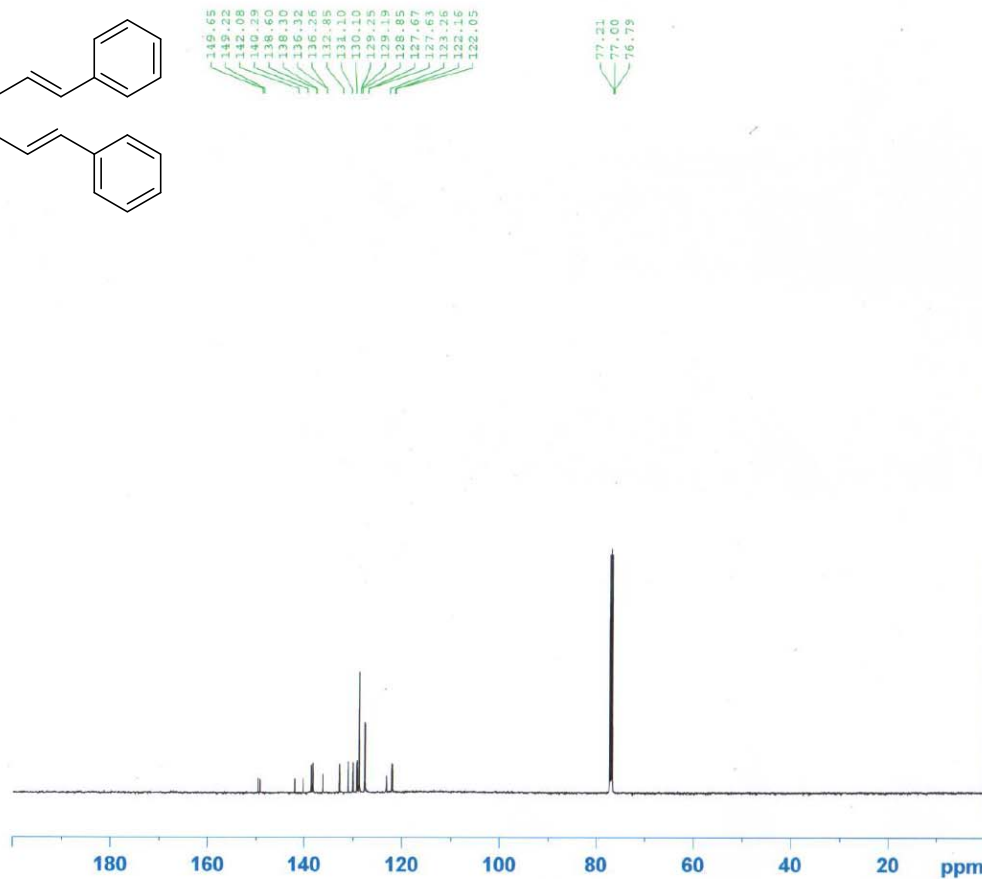

149.65  
149.22  
142.08  
140.29  
138.60  
138.50  
136.32  
136.26  
132.85  
131.10  
130.10  
129.25  
129.19  
128.85  
127.67  
127.63  
127.16  
122.05

77.31  
77.00  
76.79

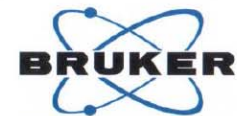

NAME JSZ2-167  
EXPNO 2  
PROCNO 1  
Date\_ 20210722  
Time 8.59  
INSTRUM spect  
PROBHD 5 mm TXI 1H/D-  
PULPROG zgpg30  
TD 65536  
SOLVENT CDCl3  
NS 443  
DS 0  
SWH 33333.332 Hz  
FIDRES 0.508626 Hz  
AQ 0.9831050 sec  
RG 46300  
DW 15.000 usec  
DE 6.00 usec  
TE 300.1 K  
D1 2.40000010 sec  
D11 0.03000000 sec  
TD0 1

===== CHANNEL f1 =====  
NUC1 13C  
P1 12.00 usec  
PL1 -3.00 dB  
PL1W 187.94520569 W  
SFO1 150.9194083 MHz

===== CHANNEL f2 =====  
CPDPRG2 waltz16  
NUC2 1H  
PCPD2 90.00 usec  
PL2 -3.00 dB  
PL12 17.00 dB  
PL13 20.00 dB  
PL2W 40.09497833 W  
PL12W 0.40094978 W  
PL13W 0.20095092 W  
SFO2 600.1339008 MHz  
SI 32768  
SF 150.9028152 MHz  
WDW EM  
SSB 0  
LB 3.00 Hz  
GB 0  
PC 1.00

$^{13}\text{C}$  NMR (150 MHz,  $\text{CDCl}_3$ ) for compound **4c**

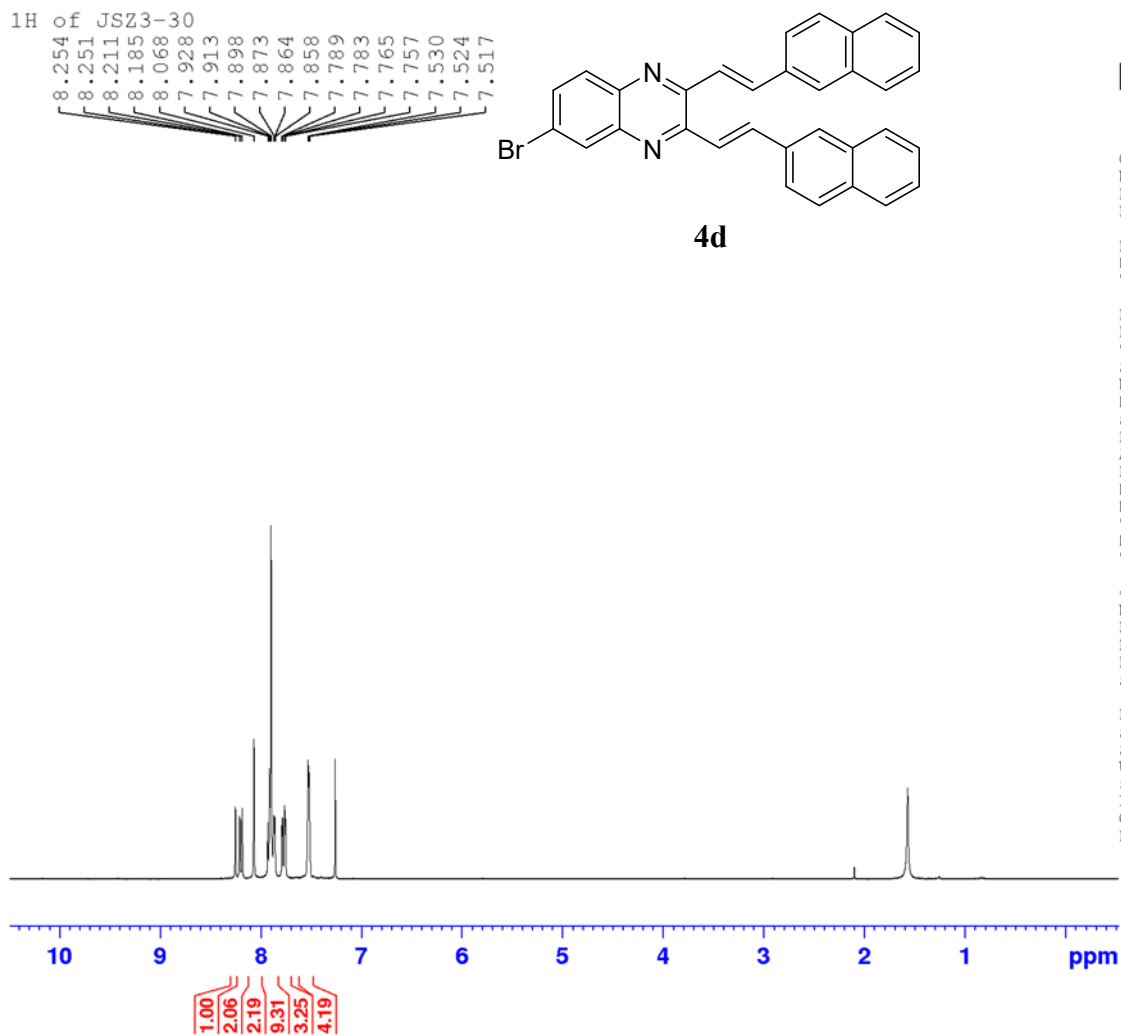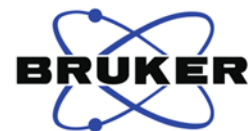

Current Data Parameters  
 NAME JSZ3-30  
 EXPNO 1  
 PROCNO 1

F2 - Acquisition Parameters  
 Date\_ 20220317  
 Time 11.28  
 INSTRUM spect  
 PROBHD 5 mm PABBO BB-  
 PULPROG zg30  
 TD 32768  
 SOLVENT CDC13  
 NS 16  
 DS 0  
 SWH 6613.757 Hz  
 FIDRES 0.201836 Hz  
 AQ 2.4772608 sec  
 RG 5790  
 DW 75.600 usec  
 DE 6.00 usec  
 TE 297.8 K  
 D1 2.0000000 sec  
 TD0 1

----- CHANNEL f1 -----  
 NUC1 1H  
 P1 10.00 usec  
 PL1 -2.70 dB  
 PL1W 37.41881180 W  
 SFO1 600.1330006 MHz

F2 - Processing parameters  
 SI 32768  
 SF 600.1300099 MHz  
 WDW no  
 SSB 0  
 LB 0 Hz  
 GB 0  
 PC 1.00

<sup>1</sup>H NMR (600 MHz, CDCl<sub>3</sub>) for compound **4d**

13C of JSZ3-30

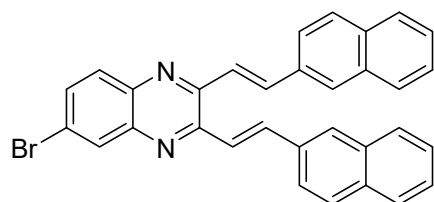

4d

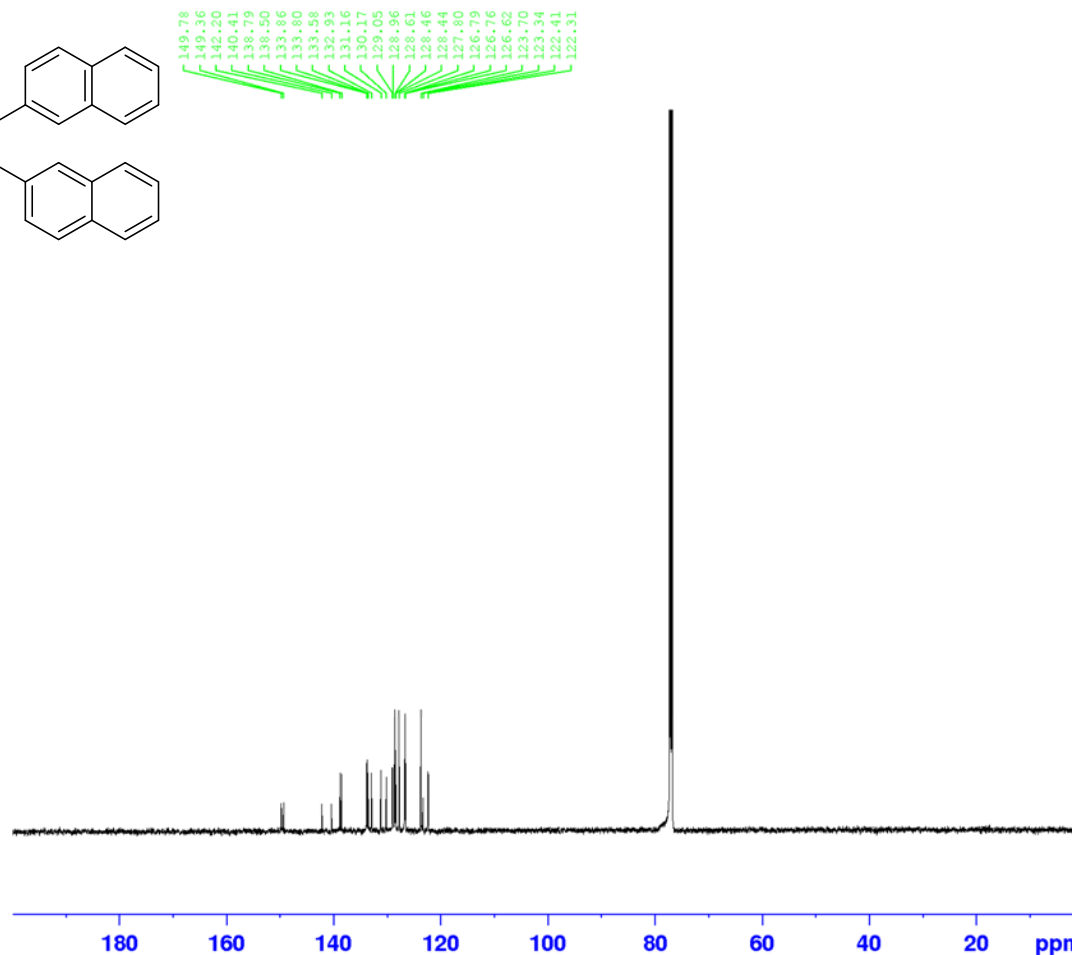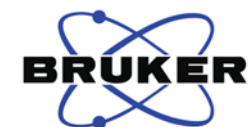

Current Data Parameters  
NAME JSZ3-30  
EXPNO 2  
PROCNO 1

F2 - Acquisition Parameters  
Date\_ 20220317  
Time 8.56  
INSTRUM spect  
PROBHD 5 mm PABBO BB-  
PULPROG zgpg30  
TD 65536  
SOLVENT CDCl3  
NS 3001  
DS 0  
SWH 33333.332 Hz  
FIDRES 0.508626 Hz  
AQ 0.9830400 sec  
RG 46300  
DW 15.000 usec  
DE 6.00 usec  
TE 299.3 K  
D1 2.40000010 sec  
D11 0.03000000 sec  
TDO 1

===== CHANNEL f1 =====  
NUC1 13C  
P1 10.00 usec  
PL1 -1.60 dB  
PL1W 136.15426636 W  
SFO1 150.9194083 MHz

===== CHANNEL f2 =====  
CPDPRG[2] waltz16  
NUC2 1H  
PCPD2 90.00 usec  
PL2 -1.50 dB  
PL12 13.20 dB  
PL13 16.20 dB  
PL2W 28.38507080 W  
PL12W 0.96181160 W  
PL13W 0.48204759 W  
SFO2 600.1339008 MHz

F2 - Processing parameters  
SI 32768  
SF 150.9028098 MHz  
WDW EM  
SSB 0  
LB 3.00 Hz  
GB 0  
PC 1.00

$^{13}\text{C}$  NMR (150 MHz,  $\text{CDCl}_3$ ) for compound 4d

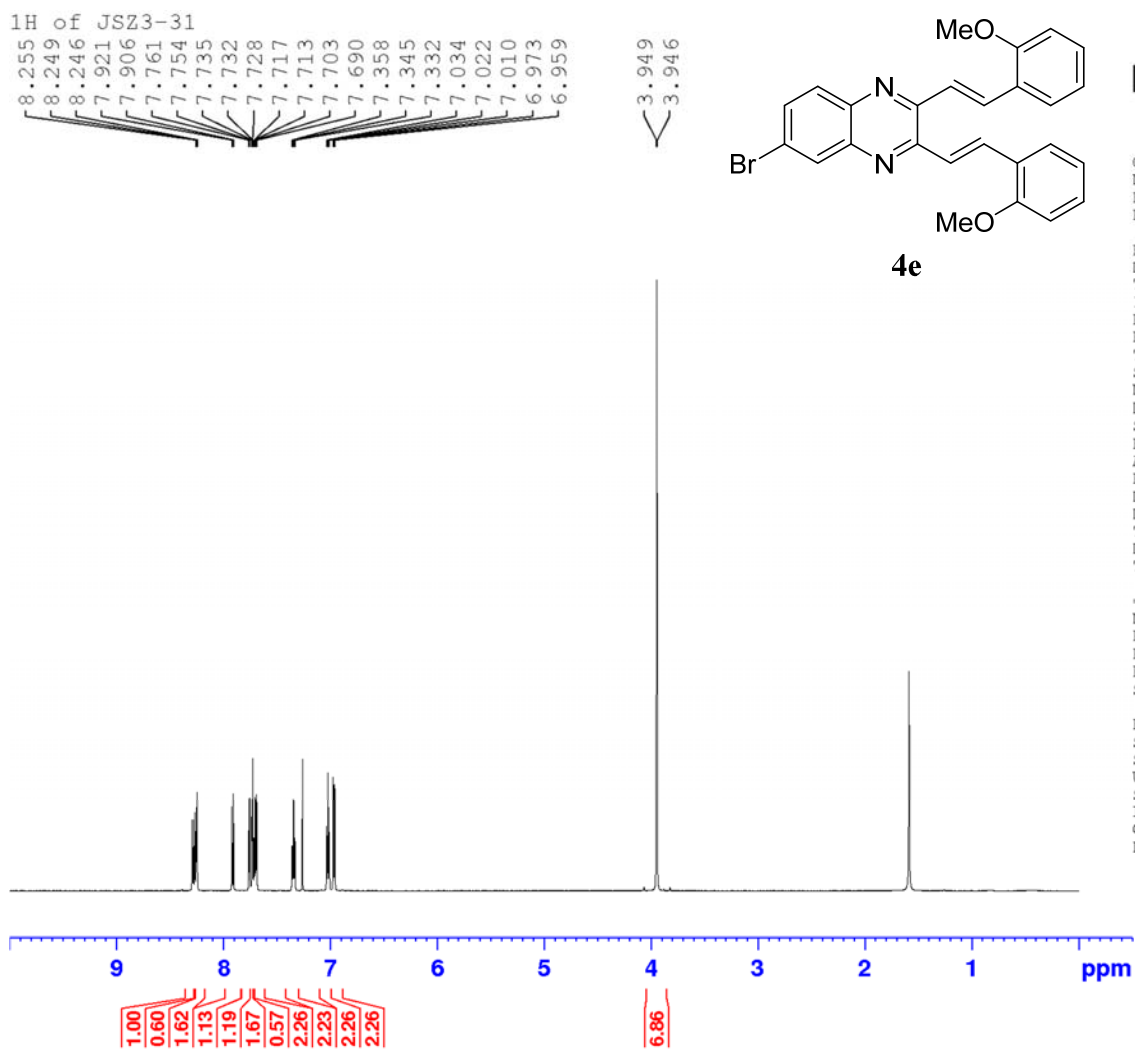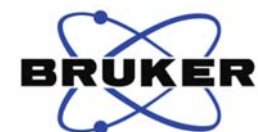

Current Data Parameters  
 NAME JSZ3-31  
 EXPNO 11  
 PROCNO 1

F2 - Acquisition Parameters  
 Date\_ 20220411  
 Time 15.41  
 INSTRUM spect  
 PROBHD 5 mm TXI 1H/D-  
 PULPROG zg30  
 TD 32768  
 SOLVENT CDCl3  
 NS 16  
 DS 0  
 SWH 7183.908 Hz  
 FIDRES 0.219235 Hz  
 AQ 2.2806528 sec  
 RG 1150  
 DW 69.600 usec  
 DE 6.00 usec  
 TE 300.0 K  
 D1 2.0000000 sec  
 TD0 1

----- CHANNEL f1 -----  
 NUC1 1H  
 P1 8.00 usec  
 PL1 0.20 dB  
 PL1W 19.19066429 W  
 SF01 600.1336008 MHz

F2 - Processing parameters  
 SI 32768  
 SF 600.1300106 MHz  
 WDW no  
 SSB 0  
 LB 0 Hz  
 GB 0  
 PC 1.00

<sup>1</sup>H NMR (600 MHz, CDCl<sub>3</sub>) for compound 4e

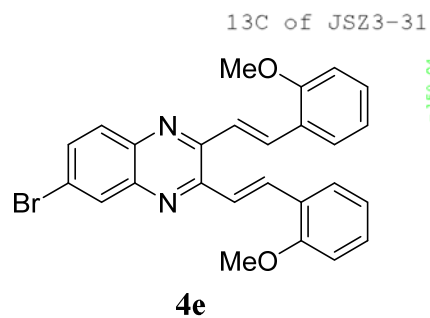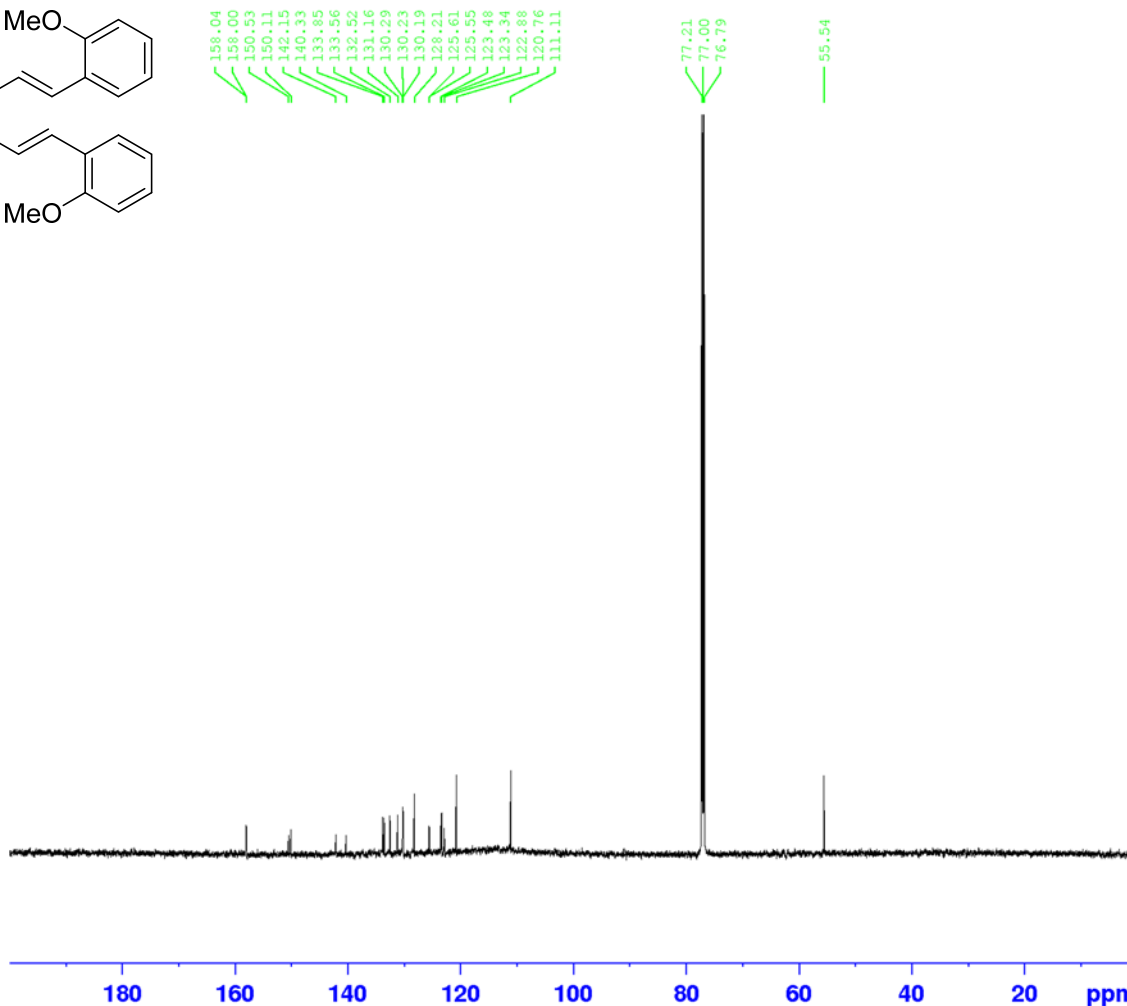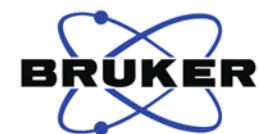

Current Data Parameters  
 NAME JSZ3-31  
 EXPNO 12  
 PROCNO 1

F2 - Acquisition Parameters  
 Date\_ 20220411  
 Time 15.49  
 INSTRUM spect  
 PROBHD 5 mm TXI 1H/D-  
 PULPROG zgpg30  
 TD 65536  
 SOLVENT CDCl3  
 NS 1015  
 DS 0  
 SWH 33333.332 Hz  
 FIDRES 0.508626 Hz  
 AQ 0.9830400 sec  
 RG 41200  
 DW 15.000 usec  
 DE 6.00 usec  
 TE 300.1 K  
 D1 2.40000010 sec  
 D11 0.03000000 sec  
 TDO 1

==== CHANNEL f1 =====  
 NUC1 13C  
 P1 12.00 usec  
 PL1 -5.20 dB  
 PL1W 311.91140747 W  
 SFO1 150.9194083 MHz

==== CHANNEL f2 =====  
 CPDPRG[2] waltz16  
 NUC2 1H  
 PCPD2 90.00 usec  
 PL2 -2.00 dB  
 PL12 10.00 dB  
 PL13 21.00 dB  
 PL2W 31.84857368 W  
 PL12W 0.31848574 W  
 PL13W 0.15962099 W  
 SFO2 600.1339008 MHz

F2 - Processing parameters  
 SI 32768  
 SF 150.9028106 MHz  
 WDW EM  
 SSB 0  
 LB 3.00 Hz  
 GB 0  
 PC 1.00

<sup>13</sup>C NMR (150 MHz, CDCl<sub>3</sub>) for compound **4e**

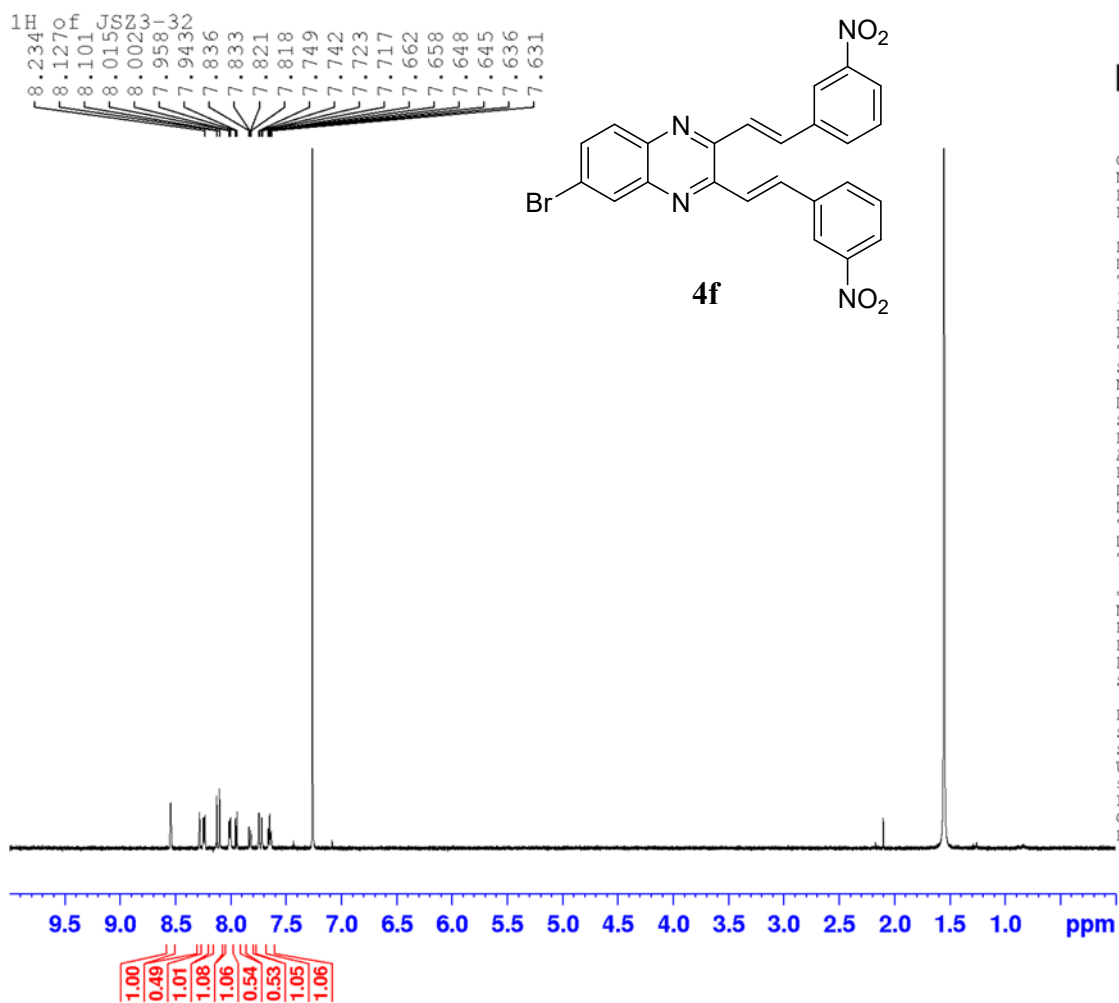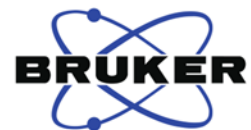

Current Data Parameters  
 NAME JSZ3-32  
 EXPNO 1  
 PROCNO 1

F2 - Acquisition Parameters  
 Date\_ 20220421  
 Time 9.18  
 INSTRUM spect  
 PROBHD 5 mm PABBO BB-  
 PULPROG zg30  
 TD 32768  
 SOLVENT CDCl3  
 NS 32  
 DS 0  
 SWH 6613.757 Hz  
 FIDRES 0.201836 Hz  
 AQ 2.4772608 sec  
 RG 16400  
 DW 75.600 usec  
 DE 6.00 usec  
 TE 297.4 K  
 D1 2.0000000 sec  
 TD0 1

----- CHANNEL f1 -----  
 NUC1 1H  
 P1 10.00 usec  
 PL1 -2.70 dB  
 PL1W 37.41881180 W  
 SFO1 600.1330006 MHz

F2 - Processing parameters  
 SI 32768  
 SF 600.1300101 MHz  
 WDW no  
 SSB 0  
 LB 0 Hz  
 GB 0  
 PC 1.00

<sup>1</sup>H NMR (600 MHz, CDCl<sub>3</sub>) for compound **4f**

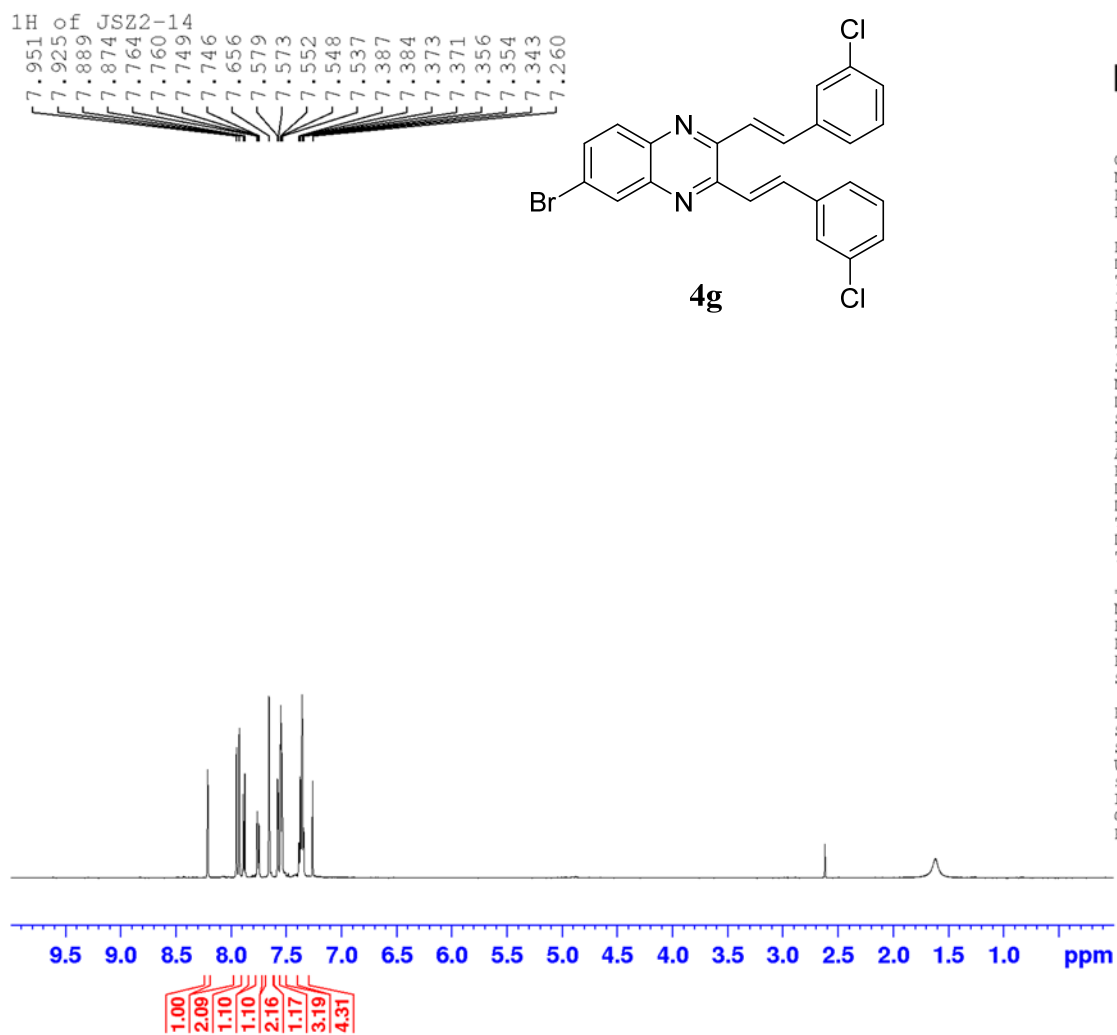

7.951  
7.925  
7.889  
7.874  
7.764  
7.760  
7.749  
7.746  
7.656  
7.579  
7.573  
7.552  
7.548  
7.537  
7.387  
7.384  
7.373  
7.371  
7.356  
7.354  
7.343  
7.260

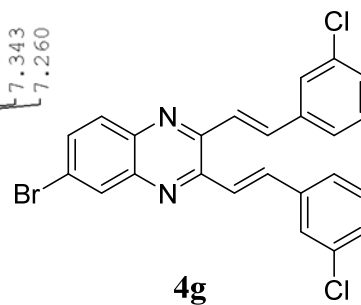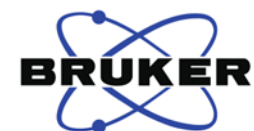

Current Data Parameters  
NAME JSZ2-14  
EXPNO 1  
PROCNO 1

F2 - Acquisition Parameters  
Date\_ 20220331  
Time 16.14  
INSTRUM spect  
PROBHD 5 mm PABBO BB-  
PULPROG zg30  
TD 32768  
SOLVENT CDCl3  
NS 16  
DS 0  
SWH 6613.757 Hz  
FIDRES 0.201836 Hz  
AQ 2.4772608 sec  
RG 3250  
DW 75.600 usec  
DE 6.00 usec  
TE 297.1 K  
D1 2.00000000 sec  
TDO 1

===== CHANNEL f1 =====  
NUC1 1H  
P1 10.00 usec  
PL1 -2.70 dB  
PLIW 37.41881180 W  
SFO1 600.1330006 MHz

F2 - Processing parameters  
SI 32768  
SF 600.1300100 MHz  
WDW no  
SSB 0  
LB 0 Hz  
GB 0  
PC 1.00

<sup>1</sup>H NMR (600 MHz, CDCl<sub>3</sub>) for compound **4g**

13C of JSZ2-14

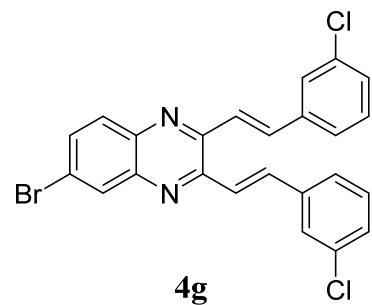

149.11  
148.67  
142.19  
140.42  
138.10  
138.04  
137.31  
137.02  
134.91  
133.27  
131.20  
130.20  
130.12  
129.21  
129.15  
127.42  
125.84  
123.87  
123.73  
123.23  
123.14

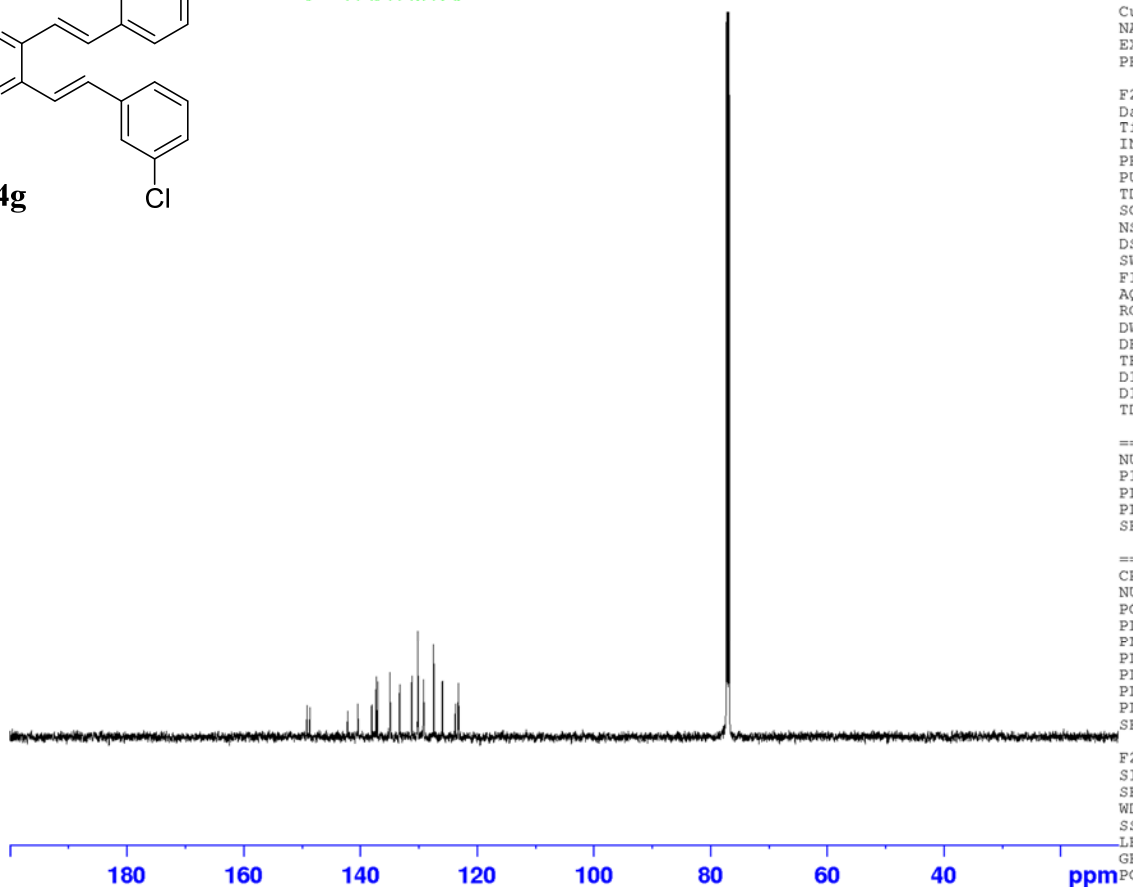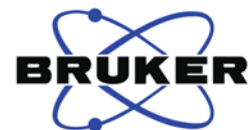

Current Data Parameters  
NAME JSZ2-14  
EXPNO 2  
PROCNO 1

F2 - Acquisition Parameters  
Date\_ 20220331  
Time\_ 16.35  
INSTRUM spect  
PROBHD 5 mm PABBO BB-  
PULPROG zgpg30  
TD 65536  
SOLVENT CDCl3  
NS 866  
DS 0  
SWH 33333.332 Hz  
FIDRES 0.508626 Hz  
AQ 0.9830400 sec  
RG 46300  
DW 15.000 usec  
DE 6.00 usec  
TE 300.4 K  
D1 2.4000010 sec  
D11 0.03000000 sec  
TD0 1

=====  
CHANNEL f1  
NUC1 13C  
P1 10.00 usec  
PL1 -1.60 dB  
PL1W 136.15426636 W  
SFO1 150.9194083 MHz

=====  
CHANNEL f2  
CPDPRG[2] waltz16  
NUC2 1H  
PCPD2 90.00 usec  
PL2 -1.50 dB  
PL12 13.20 dB  
PL13 16.20 dB  
PL2W 28.38507080 W  
PL12W 0.96181160 W  
PL13W 0.48204759 W  
SFO2 600.1339008 MHz

F2 - Processing parameters  
SI 32768  
SF 150.9028097 MHz  
WDW EM  
SSB 0  
LB 3.00 Hz  
GB 0  
PC 1.00

<sup>13</sup>C NMR (150 MHz, CDCl<sub>3</sub>) for compound 4g



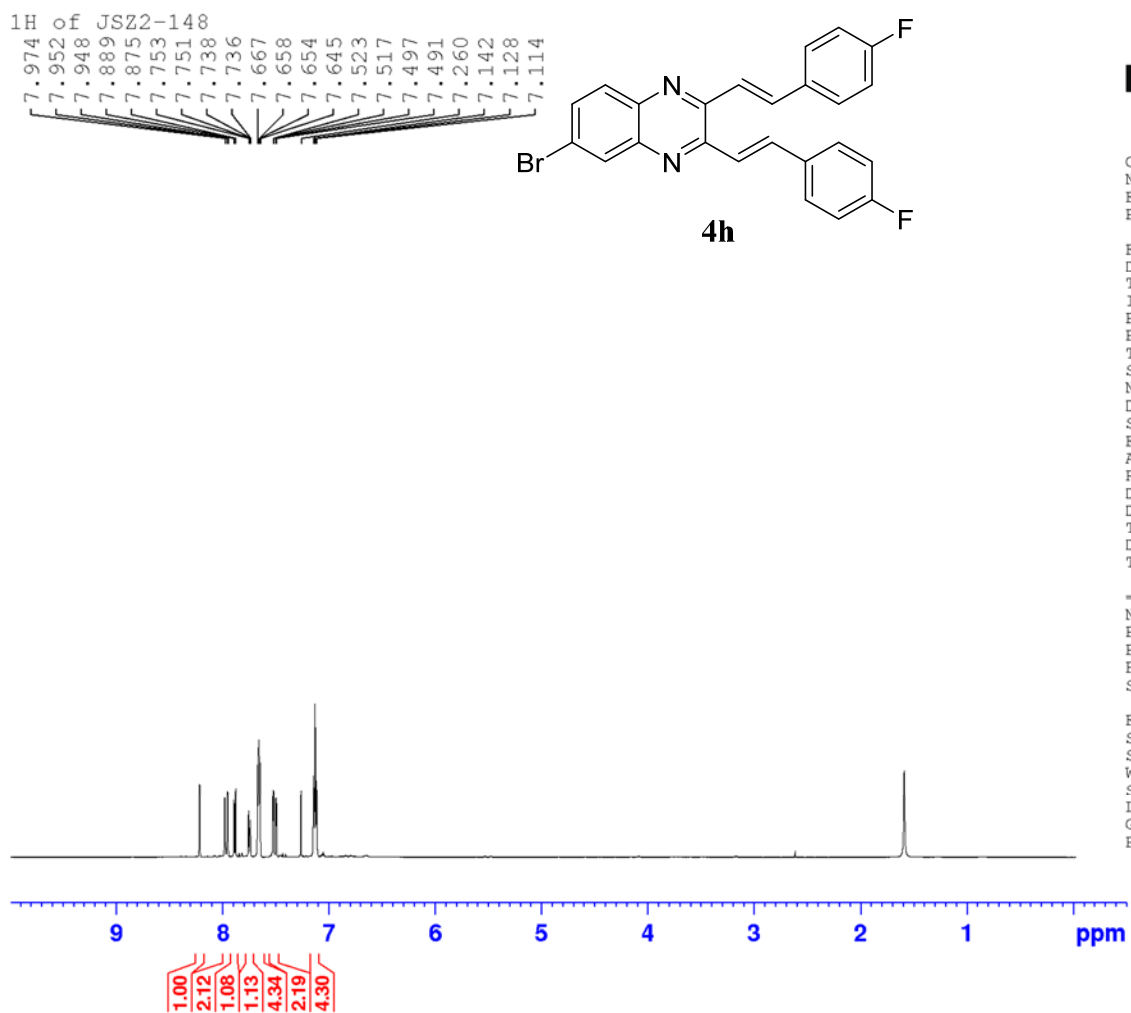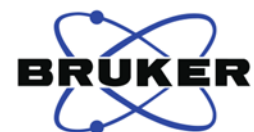

Current Data Parameters  
 NAME JSZ2-148  
 EXPNO 1  
 PROCNO 1

F2 - Acquisition Parameters  
 Date\_ 20220315  
 Time 13.37  
 INSTRUM spect  
 PROBHD 5 mm TXI 1H/D-  
 PULPROG zg30  
 TD 32768  
 SOLVENT CDCl3  
 NS 16  
 DS 0  
 SWH 6009.615 Hz  
 FIDRES 0.183399 Hz  
 AQ 2.7262976 sec  
 RG 1290  
 DW 83.200 usec  
 DE 6.00 usec  
 TE 299.9 K  
 D1 2.0000000 sec  
 TD0 1

----- CHANNEL f1 -----  
 NUC1 1H  
 P1 8.00 usec  
 PL1 0.20 dB  
 PL1W 19.19066429 W  
 SFO1 600.1330006 MHz

F2 - Processing parameters  
 SI 32768  
 SF 600.1300110 MHz  
 WDW no  
 SSB 0  
 LB 0 Hz  
 GB 0  
 PC 1.00

$^1\text{H}$  NMR (600 MHz,  $\text{CDCl}_3$ ) for compound **4h**

13C of JSZ2-148

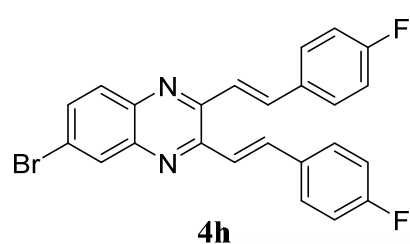

164.17  
164.13  
162.51  
149.47  
149.04  
145.12  
140.33  
137.43  
137.14  
133.00  
132.54  
131.50  
131.11  
130.11  
129.42  
129.37  
129.31  
125.41  
121.80  
121.69  
116.05  
115.90

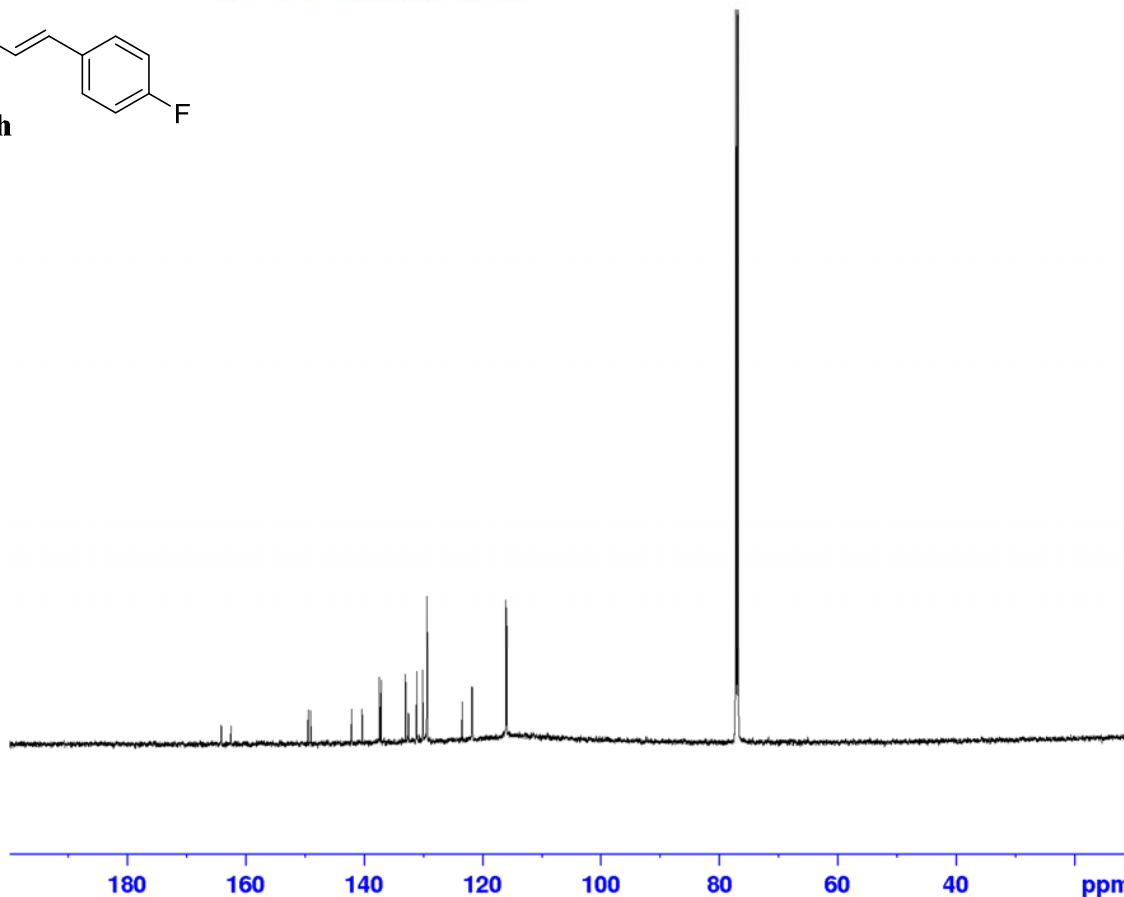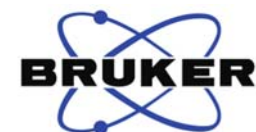

Current Data Parameters  
NAME JSZ2-148  
EXPNO 2  
PROCNO 1

F2 - Acquisition Parameters  
Date\_ 20220315  
Time 15.16  
INSTRUM spect  
PROBHD 5 mm TXI 1H/D-  
PULPROG zgpg30  
TD 65536  
SOLVENT CDCl3  
NS 2068  
DS 0  
SWH 33333.332 Hz  
FIDRES 0.508626 Hz  
AQ 0.9830400 sec  
RG 41200  
DW 15.000 usec  
DE 6.00 usec  
TE 300.1 K  
D1 2.4000010 sec  
D11 0.03000000 sec  
TD0 1

===== CHANNEL f1 =====  
NUC1 13C  
P1 12.00 usec  
PL1 -5.20 dB  
PL1W 311.91140747 W  
SFO1 150.9194083 MHz

===== CHANNEL f2 =====  
CPDPRG[2] waltz16  
NUC2 1H  
PCPD2 90.00 usec  
PL2 -2.00 dB  
PL12 18.00 dB  
PL13 21.00 dB  
PL2W 31.84857368 W  
PL12W 0.31848574 W  
PL13W 0.15962099 W  
SFO2 600.1339008 MHz

F2 - Processing parameters  
SI 32768  
SF 150.9028108 MHz  
WDW EM  
SSB 0  
LB 3.00 Hz  
GB 0  
PC 1.00

<sup>13</sup>C NMR (150 MHz, CDCl<sub>3</sub>) for compound **4h**

<sup>1</sup>H  
 8.222  
 7.970  
 7.944  
 7.897  
 7.882  
 7.766  
 7.763  
 7.751  
 7.748  
 7.613  
 7.599  
 7.576  
 7.570  
 7.550  
 7.544  
 7.415  
 7.413  
 7.401  
 7.259

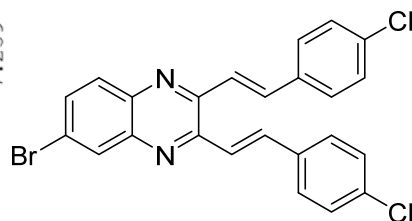

**4i**

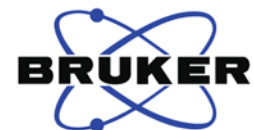

Current Data Parameters  
 NAME JSZ3-9  
 EXPNO 1  
 PROCNO 1

F2 - Acquisition Parameters  
 Date\_ 20220329  
 Time 15.31  
 INSTRUM spect  
 PROBHD 5 mm TXI 1H/D-  
 PULPROG zg30  
 TD 32768  
 SOLVENT CDCl3  
 NS 16  
 DS 0  
 SWH 6613.757 Hz  
 FIDRES 0.201836 Hz  
 AQ 2.4772608 sec  
 RG 2890  
 DW 75.600 usec  
 DE 6.00 usec  
 TE 334.1 K  
 D1 2.0000000 sec  
 TD0 1

----- CHANNEL f1 -----  
 NUC1 1H  
 P1 8.00 usec  
 PL1 0.20 dB  
 PL1W 19.19066429 W  
 SF01 600.1330006 MHz

F2 - Processing parameters  
 SI 32768  
 SF 600.1300113 MHz  
 WDW EM  
 SSR 0  
 LB 0 Hz  
 GB 0  
 PC 1.00

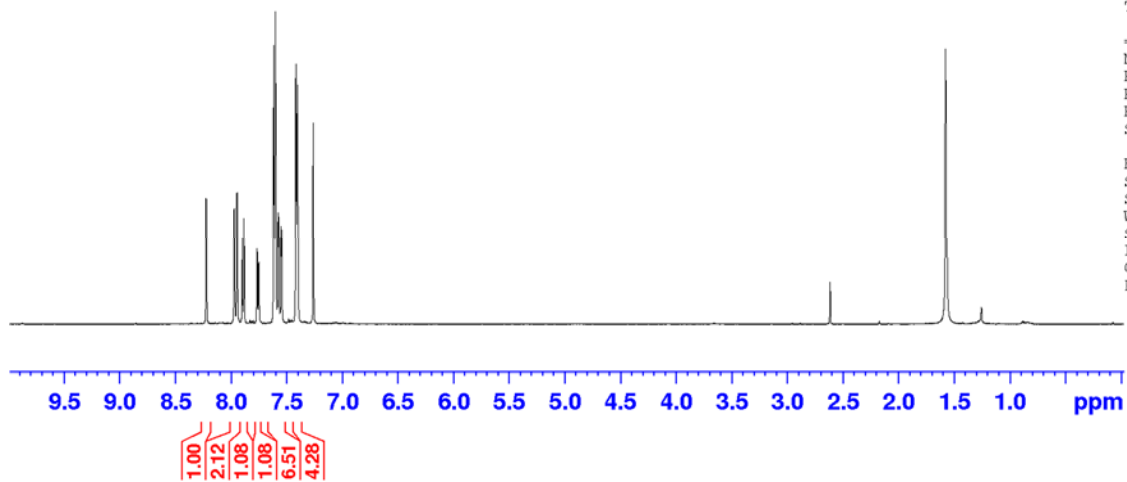

<sup>1</sup>H NMR (600 MHz, CDCl<sub>3</sub>) for compound **4i**

13C of JSZ3-9

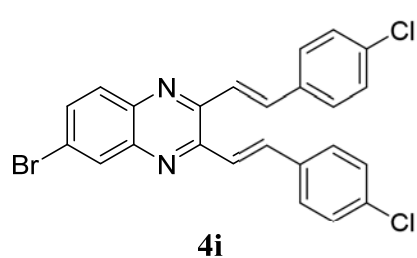

149.30  
148.87  
142.15  
140.37  
137.36  
137.07  
135.13  
135.06  
134.76  
134.70  
133.16  
131.14  
130.14  
129.14  
128.83  
128.79  
123.60  
122.50  
122.40

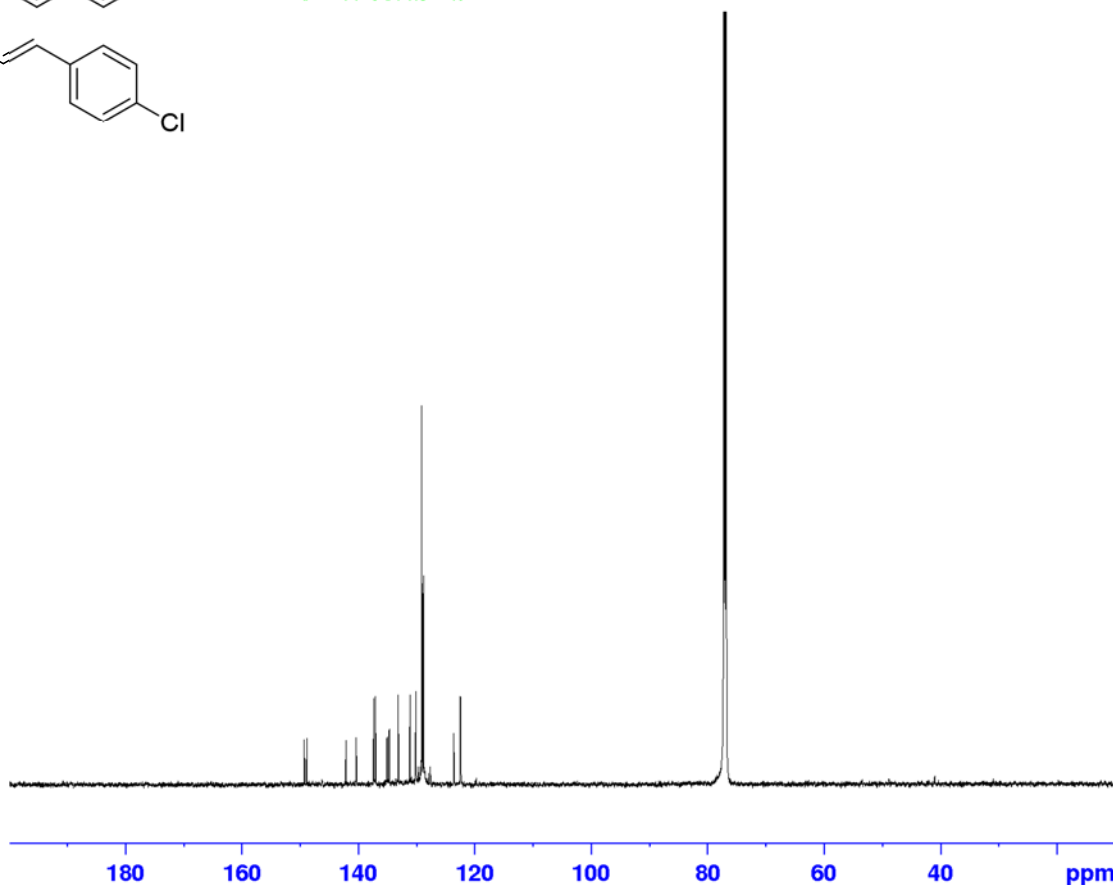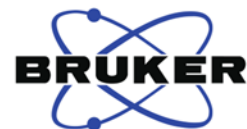

Current Data Parameters  
NAME JSZ3-9  
EXPNO 2  
PROCNO 1

F2 - Acquisition Parameters  
Date\_ 20220326  
Time 7.41  
INSTRUM spect  
PROBHD 5 mm PABBO BB-  
PULPROG zgpg30  
TD 65536  
SOLVENT CDCl3  
NS 16000  
DS 0  
SWH 33333.332 Hz  
FIDRES 0.508626 Hz  
AQ 0.9830400 sec  
RG 46300  
DW 15.000 usec  
DE 6.00 usec  
TE 674.0 K  
D1 2.40000010 sec  
D11 0.03000000 sec  
TD0 1

==== CHANNEL f1 =====  
NUC1 13C  
P1 9.00 usec  
PL1 2.50 dB  
PL1W 52.97015762 W  
SFO1 150.9194083 MHz

==== CHANNEL f2 =====  
CPDPRG[2] waltz16  
NUC2 1H  
PCPD2 100.00 usec  
PL2 -2.60 dB  
PL12 15.50 dB  
PL13 18.00 dB  
PL2W 36.56705475 W  
PL12W 0.56635660 W  
PL13W 0.31848574 W  
SFO2 600.1339008 MHz

F2 - Processing parameters  
SI 32768  
SF 150.9028109 MHz  
WDW EM  
SSB 0  
LB 3.00 Hz  
GB 0  
PC 1.00

<sup>13</sup>C NMR (150 MHz, CDCl<sub>3</sub>) for compound **4i**

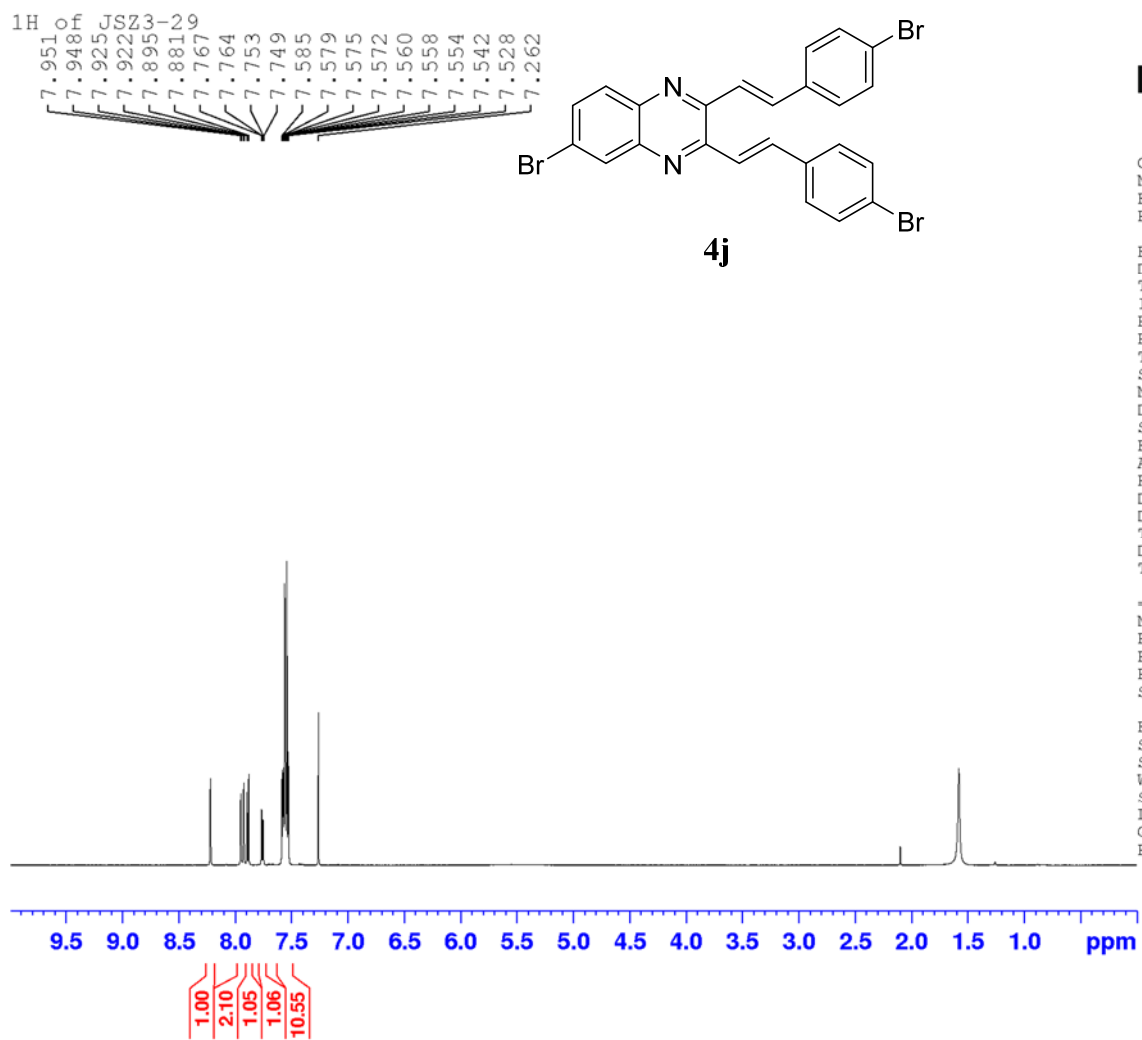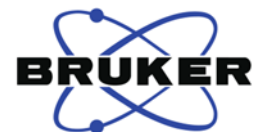

Current Data Parameters  
 NAME JSZ3-29  
 EXPNO 1  
 PROCNO 1

F2 - Acquisition Parameters  
 Date\_ 20220330  
 Time 16.21  
 INSTRUM spect  
 PROBHD 5 mm TXI 1H/D-  
 PULPROG zg30  
 TD 32768  
 SOLVENT CDC13  
 NS 16  
 DS 0  
 SWH 6613.757 Hz  
 FIDRES 0.201836 Hz  
 AQ 2.4772608 sec  
 RG 2890  
 DW 75.600 usec  
 DE 6.00 usec  
 TE 300.0 K  
 D1 2.00000000 sec  
 TDO 1

----- CHANNEL f1 -----  
 NUC1 1H  
 P1 8.00 usec  
 PL1 0.20 dB  
 PL1W 19.19066429 W  
 SFO1 600.1330006 MHz

F2 - Processing parameters  
 SI 32768  
 SF 600.1330099 MHz  
 WDW no  
 SSB 0  
 LB 0 Hz  
 GB 0  
 PC 1.00

<sup>1</sup>H NMR (600 MHz, CDCl<sub>3</sub>) for compound **4j**

13C of JSZ3-29

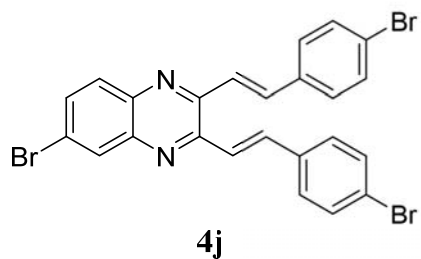

149.31  
148.87  
142.19  
140.41  
137.46  
137.17  
135.20  
135.14  
133.21  
132.10  
131.17  
131.16  
129.08  
129.04  
123.64  
123.42  
123.34  
122.63  
122.53

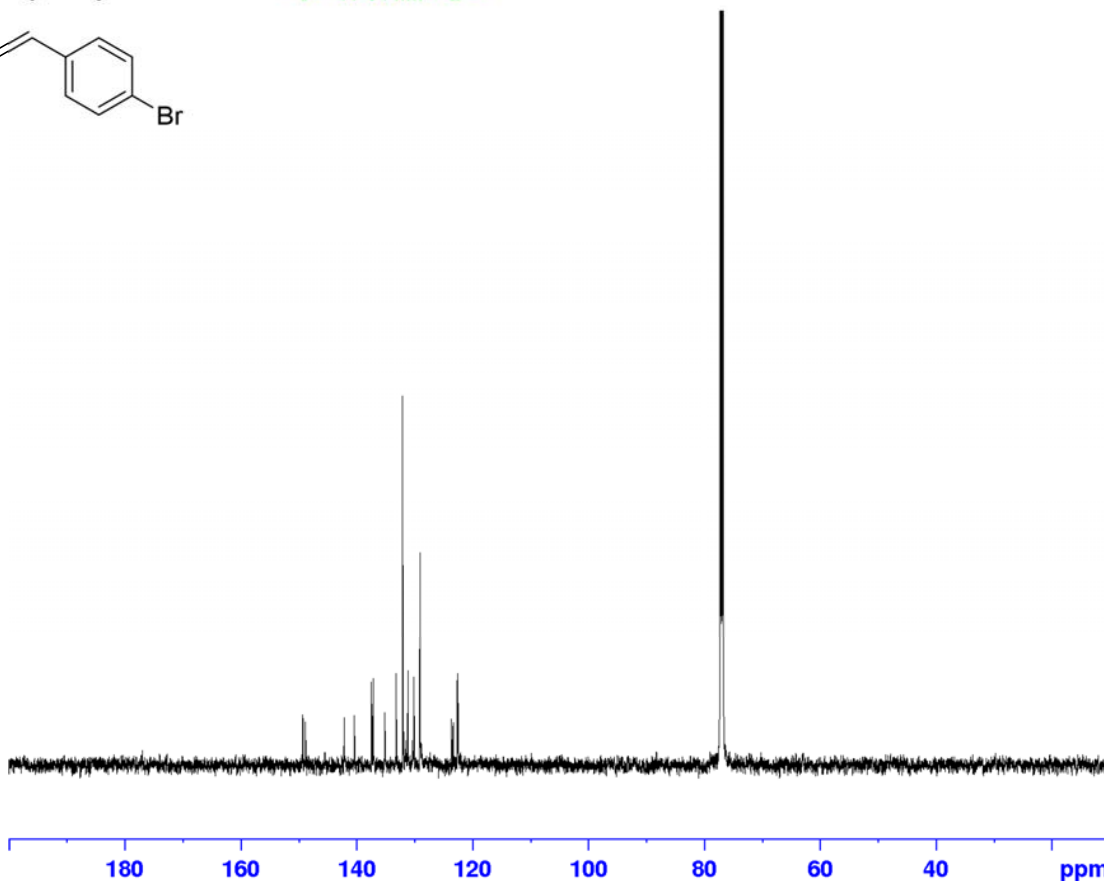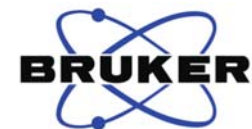

Current Data Parameters  
NAME JSZ3-29  
EXPNO 2  
PROCNO 1

F2 - Acquisition Parameters  
Date\_ 20220318  
Time 9.29  
INSTRUM spect  
PROBHD 5 mm PABBO BB-  
PULPROG zgpg30  
TD 65536  
SOLVENT CDC13  
NS 1204  
DS 0  
SWH 33333.332 Hz  
FIDRES 0.508626 Hz  
AQ 0.9830400 sec  
RG 46300  
DW 15.000 usec  
DE 6.00 usec  
TE 299.6 K  
D1 2.4000010 sec  
D11 0.03000000 sec  
TD0 1

===== CHANNEL f1 =====  
NUC1 13C  
P1 10.00 usec  
PL1 -1.60 dB  
PL1W 136.15426636 W  
SFO1 150.9194083 MHz

===== CHANNEL f2 =====  
CPDPRG[2] waltz16  
NUC2 1H  
PCPD2 90.00 usec  
PL2 -1.50 dB  
PL12 13.20 dB  
PL13 16.20 dB  
PL2W 28.38507080 W  
PL12W 0.96181160 W  
PL13W 0.48204759 W  
SFO2 600.1339008 MHz

F2 - Processing parameters  
SI 32768  
SF 150.9028098 MHz  
WDW EM  
SSB 0  
LB 3.00 Hz  
GB 0  
PC 1.00

<sup>13</sup>C NMR (150 MHz, CDCl<sub>3</sub>) for compound **4j**

<sup>1</sup>H OF

8.320  
8.307  
8.285  
8.120  
8.095  
7.959  
7.944  
7.842  
7.829  
7.805  
7.765  
7.738

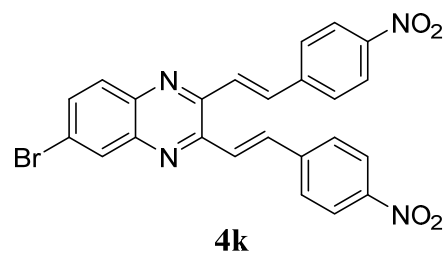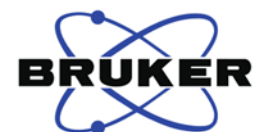

Current Data Parameters  
NAME JSZ2-154  
EXPNO 1  
PROCNO 1

F2 - Acquisition Parameters  
Date\_ 20220421  
Time 13.33  
INSTRUM spect  
PROBHD 5 mm PABBO BB-  
PULPROG zg30  
TD 32768  
SOLVENT CDCl3  
NS 32  
DS 0  
SWH 6613.757 Hz  
FIDRES 0.201836 Hz  
AQ 2.4772608 sec  
RG 16400  
DW 75.600 usec  
DE 6.00 usec  
TE 297.1 K  
D1 2.00000000 sec  
TD0 1

----- CHANNEL f1 -----  
NUC1 1H  
P1 15.00 usec  
PL1 -0.80 dB  
PL1W 24.15961456 W  
SFO1 600.1330006 MHz

F2 - Processing parameters  
SI 32768  
SF 600.1300118 MHz  
WDW no  
SSB 0  
LB 0 Hz  
GB 0  
PC 1.00

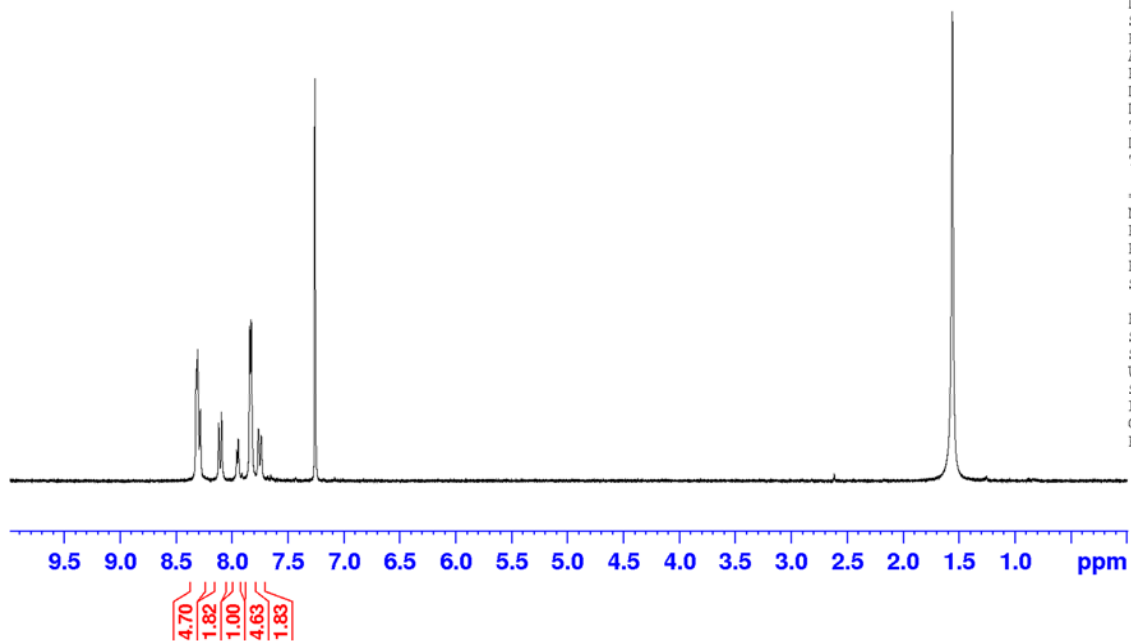

<sup>1</sup>H NMR (600 MHz, CDCl<sub>3</sub>) for compound **4k**

13C of JSZ2-154

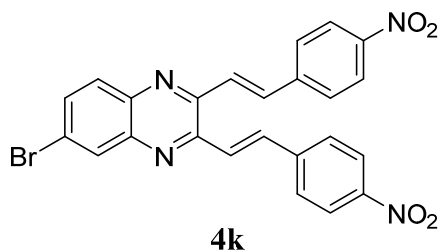

148.40  
147.94  
147.82  
142.66  
142.19  
142.12  
140.53  
136.23  
135.94  
133.88  
131.24  
130.22  
128.09  
128.03  
125.65  
125.56  
124.43  
124.17

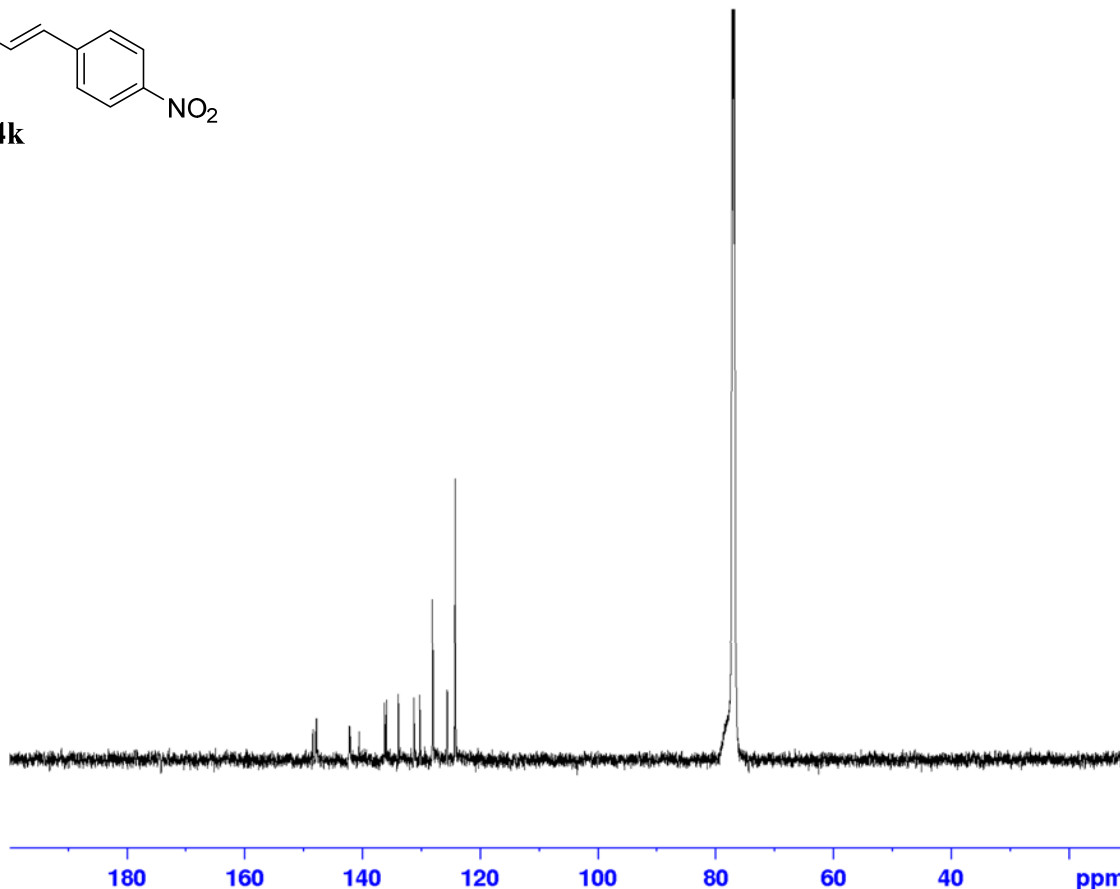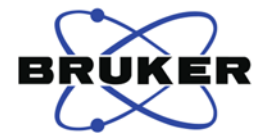

Current Data Parameters  
NAME JSZ2-154  
EXPNO 2  
PROCNO 1

F2 - Acquisition Parameters  
Date\_ 20220421  
Time 15.32  
INSTRUM spect  
PROBHD 5 mm PABBO BB-  
PULPROG zgpg30  
TD 65536  
SOLVENT CDCl3  
NS 20785  
DS 0  
SWH 33333.332 Hz  
FIDRES 0.508626 Hz  
AQ 0.9830400 sec  
RG 46300  
DW 15.000 usec  
DE 6.00 usec  
TE 299.3 K  
D1 2.40000010 sec  
D11 0.03000000 sec  
TD0 1

===== CHANNEL f1 =====  
NUC1 13C  
P1 10.00 usec  
PL1 -1.60 dB  
PL1W 136.15426636 W  
SFO1 150.9194083 MHz

===== CHANNEL f2 =====  
CPDPRG[2] waltz16  
NUC2 1H  
PCPD2 90.00 usec  
PL2 -1.50 dB  
PL12 13.20 dB  
PL13 16.20 dB  
PL2W 28.38507080 W  
PL12W 0.96181160 W  
PL13W 0.48204759 W  
SFO2 600.1348880 MHz

F2 - Processing parameters  
SI 32768  
SF 150.9028294 MHz  
WDW EM  
SSB 0  
LB 3.00 Hz  
GB 0  
PC 1.00

<sup>13</sup>C NMR (150 MHz, CDCl<sub>3</sub>) for compound 4k



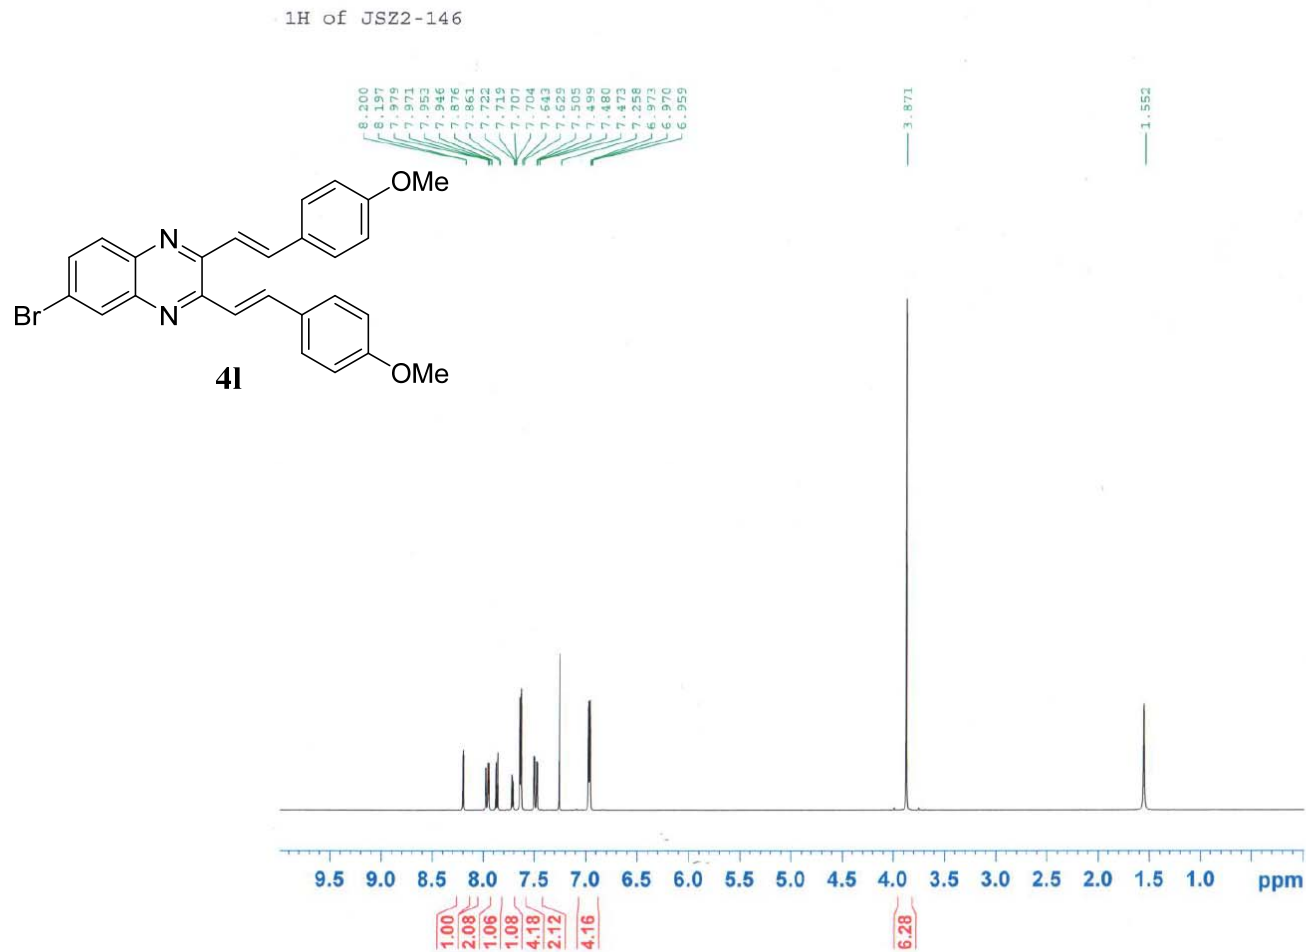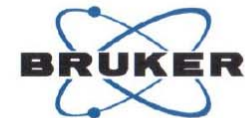

```

NAME      JSZ2-146
EXPNO     1
PROCNO    1
Date_     20220309
Time      16.27
INSTRUM   spect
PROBHD    5 mm TXI 1H/D-
PULPROG   zg30
TD         32768
SOLVENT   CDCl3
NS         16
DS         0
SWH        6009.615 Hz
FIDRES     0.183399 Hz
AQ         2.7264309 sec
RG         2050
DW         83.200 usec
DE         6.00 usec
TE         300.0 K
D1         2.0000000 sec
TDO        1
  
```

```

===== CHANNEL f1 =====
NUC1      1H
P1         8.00 usec
PL1        0.20 dB
PL1W      19.19066429 W
SF01      600.1330006 MHz
SI         32768
SF         600.1300117 MHz
WDW        no
SSB        0
LB         0.00 Hz
GB         0
PC         1.00
  
```

<sup>1</sup>H NMR (600 MHz, CDCl<sub>3</sub>) for compound **4I**

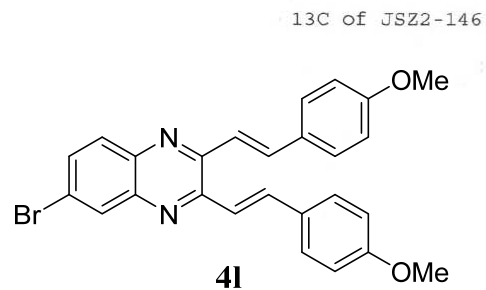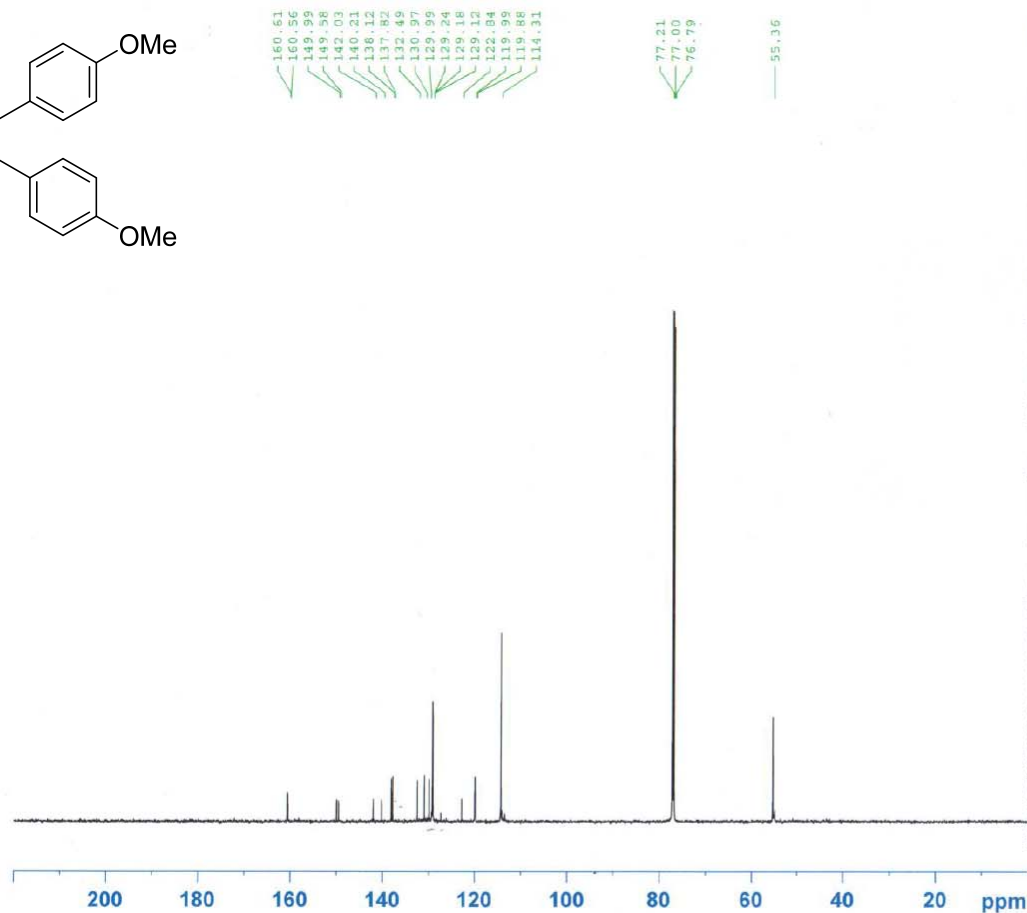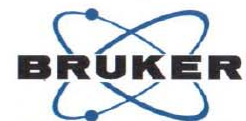

```

NAME          JSZ2-146
EXPNO         2
PROCNO        1
Date_         20220304
Time          16.07
INSTRUM       spect
PROBHD        5 mm PABBO BB-
PULPROG       zgpg30
TD            65536
SOLVENT       CDCl3
NS            787
DS            0
SWH           33333.332 Hz
FIDRES        0.508626 Hz
AQ            0.9831050 sec
RG            46300
DW            15.000 usec
DE            6.00 usec
TE            301.1 K
D1            2.40000010 sec
D11           0.03000000 sec
TD0           1
  
```

```

===== CHANNEL f1 =====
NUC1          13C
P1            10.00 usec
PL1           -1.60 dB
PL1W          136.15426636 W
SFO1          150.9194083 MHz
  
```

```

===== CHANNEL f2 =====
CPDPRG2       waltz16
NUC2          1H
PCPD2         90.00 usec
PL2           -1.50 dB
PL12          13.20 dB
PL13          16.20 dB
PL2W          28.38507080 W
PL12W         0.96181160 W
PL13W         0.48204759 W
SFO2          600.1339008 MHz
SI            32768
SF            150.9028108 MHz
WDW           EM
SSB           0
LB            3.00 Hz
GB            0
PC            1.00
  
```

<sup>13</sup>C NMR (150 MHz, CDCl<sub>3</sub>) for compound **4I**

1H of JSZ3-26

10.122  
10.117  
8.183  
8.181  
7.946  
7.920  
7.905  
7.890  
7.880  
7.865  
7.854  
7.843  
7.830  
7.821  
7.687  
7.681  
7.674  
7.668

2.073

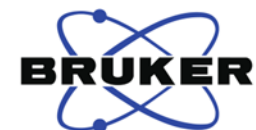

Current Data Parameters  
NAME JSZ3-26  
EXPNO 1  
PROCNO 1

F2 - Acquisition Parameters  
Date\_ 20220414  
Time 16.43  
INSTRUM spect  
PROBHD 5 mm PABBO BB-  
PULPROG zg30  
TD 32768  
SOLVENT DMSO  
NS 16  
DS 0  
SWH 7183.908 Hz  
FIDRES 0.219235 Hz  
AQ 2.2806528 sec  
RG 1150  
DW 69.600 usec  
DE 6.00 usec  
TE 300.1 K  
D1 2.0000000 sec  
TD0 1

===== CHANNEL f1 =====  
NUC1 1H  
P1 15.00 usec  
PL1 -0.80 dB  
PL1W 24.15961456 W  
SF01 600.1336008 MHz

F2 - Processing parameters  
SI 32768  
SF 600.1300062 MHz  
WDW no  
SSB 0  
LB 0 Hz  
GB 0  
PC 1.00

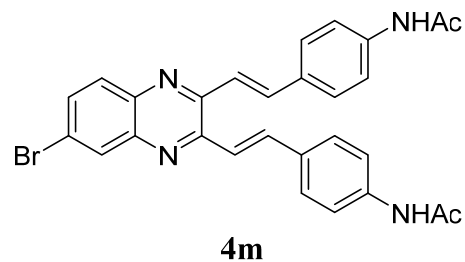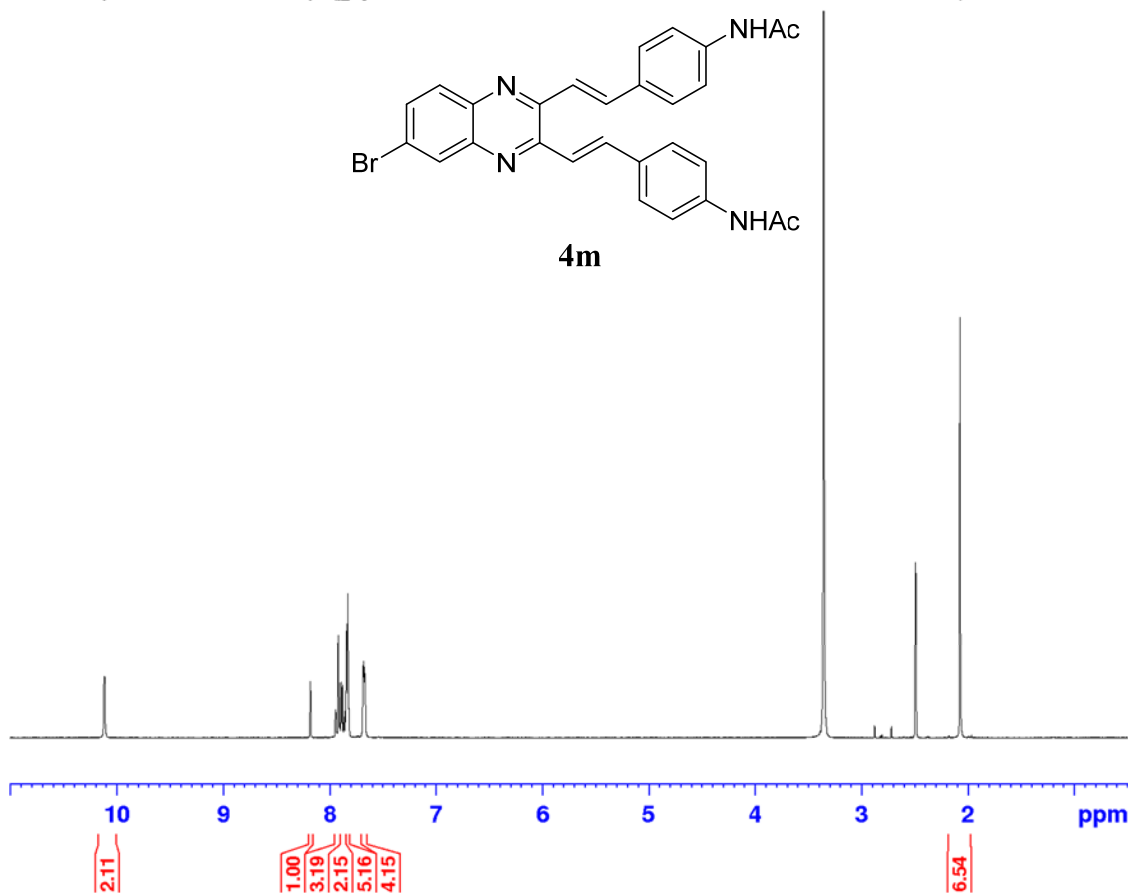

<sup>1</sup>H NMR (600 MHz, DMSO-*d*<sub>6</sub>) for compound **4m**

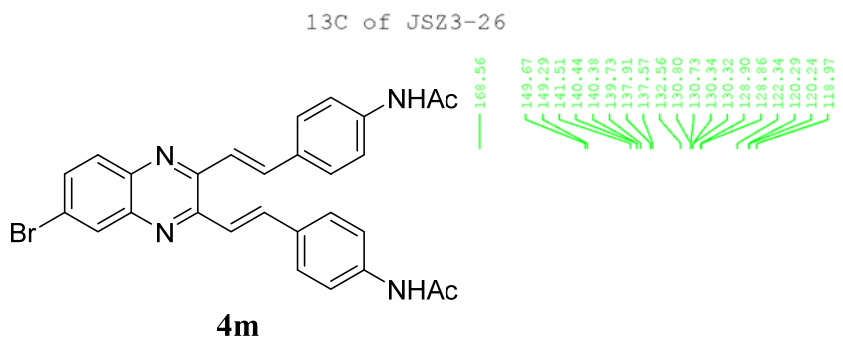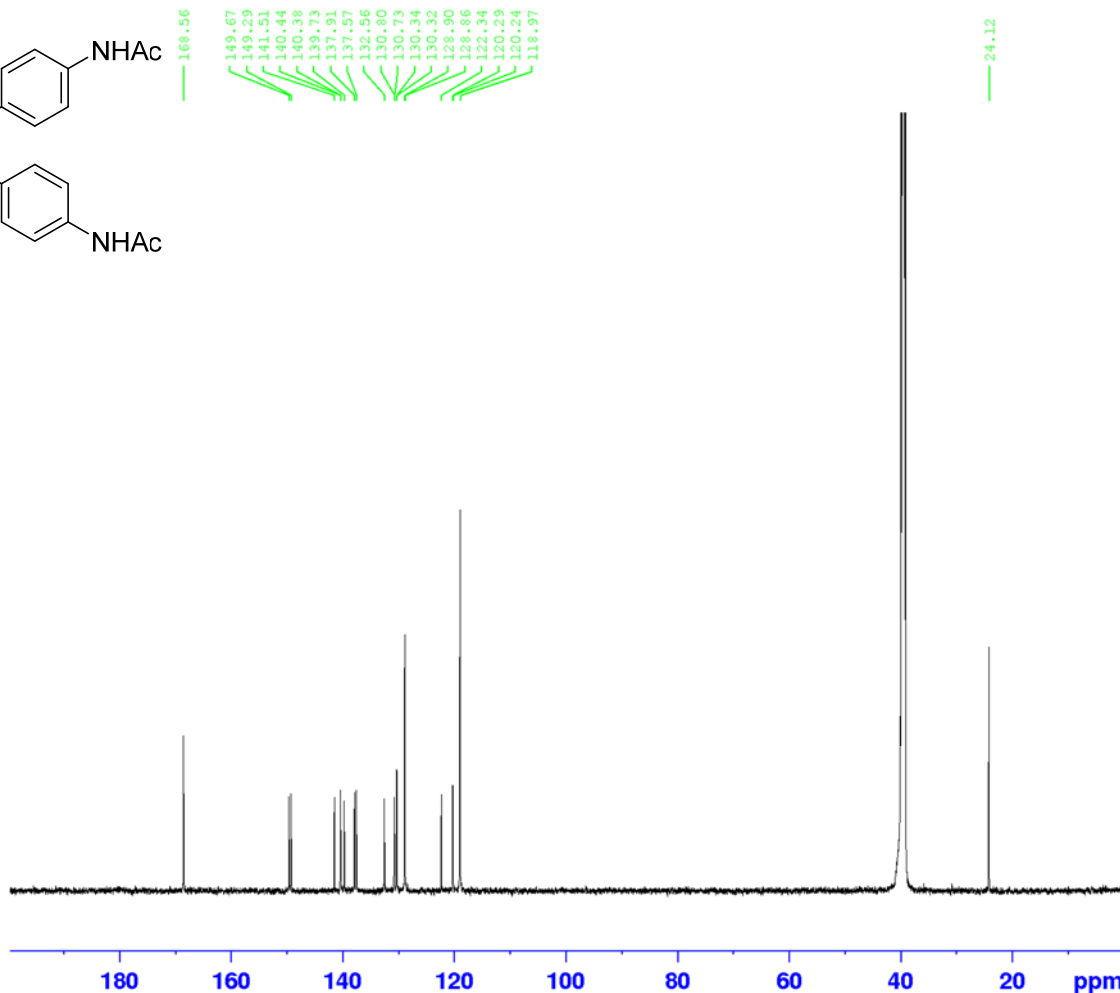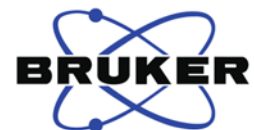

Current Data Parameters  
NAME JSZ3-26  
EXPNO 2  
PROCNO 1

F2 - Acquisition Parameters  
Date\_ 20220415  
Time 9.01  
INSTRUM spect  
PROBHD 5 mm PABBO BB-  
PULPROG zgpg30  
TD 65536  
SOLVENT DMSO  
NS 17100  
DS 0  
SWH 34013.605 Hz  
FIDRES 0.519006 Hz  
AQ 0.9633792 sec  
RG 46300  
DW 14.700 usec  
DE 6.00 usec  
TE 300.0 K  
D1 2.40000010 sec  
D11 0.03000000 sec  
TD0 1

===== CHANNEL f1 =====  
NUC1 13C  
P1 10.00 usec  
PL1 -1.60 dB  
PL1W 136.15426636 W  
SFO1 150.9194083 MHz

===== CHANNEL f2 =====  
CPDPRG[2] waltz16  
NUC2 1H  
PCPD2 90.00 usec  
PL2 -1.50 dB  
PL12 13.20 dB  
PL13 16.20 dB  
PL2W 28.38507080 W  
PL12W 0.96181160 W  
PL13W 0.48204759 W  
SFO2 600.1339008 MHz

F2 - Processing parameters  
SI 32768  
SF 150.9028764 MHz  
WDW EM  
SSB 0  
LB 3.00 Hz  
GB 0  
PC 1.00

<sup>13</sup>C NMR (150 MHz, DMSO-*d*<sub>6</sub>) for compound **4m**

1H of JSZ2-196

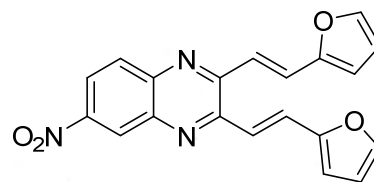

5a

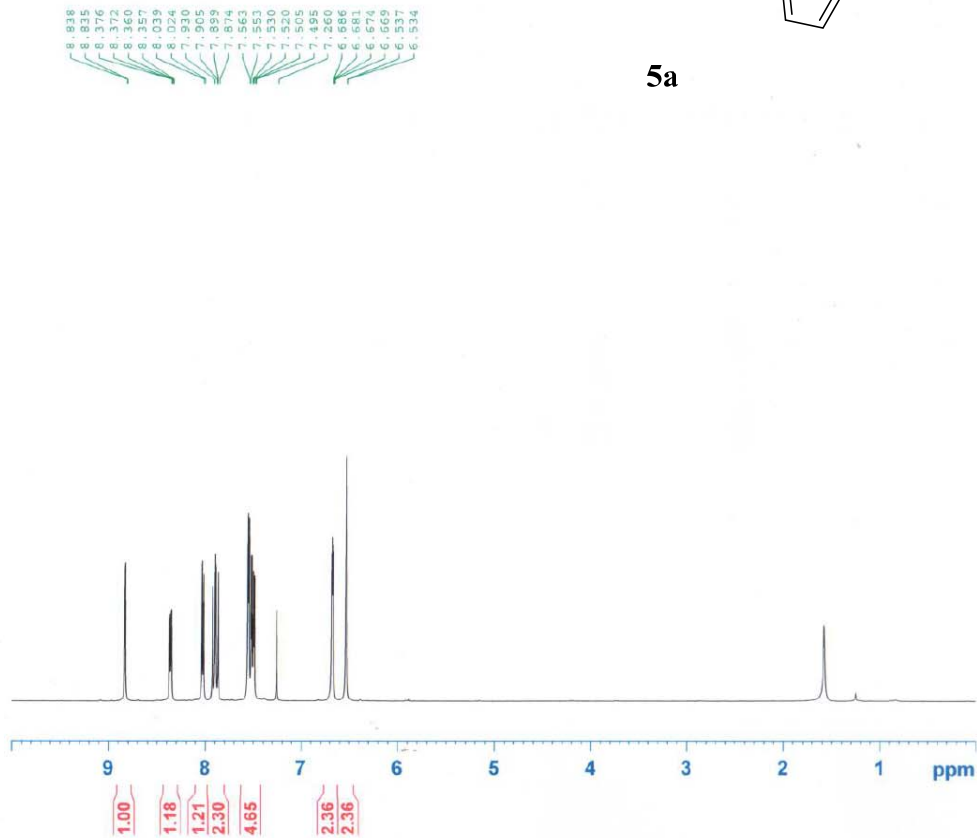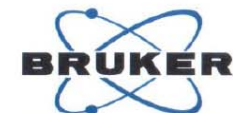

```
NAME JSZ2-196
EXPNO 1
PROCNO 1
Date_ 20220518
Time 11.34
INSTRUM spect
PROBHD 5 mm TXI 1H/D-
PULPROG zg30
TD 32768
SOLVENT CDCl3
NS 16
DS 0
SWH 6613.757 Hz
FIDRES 0.201836 Hz
AQ 2.4773865 sec
RG 1150
DW 75.600 usec
DE 6.00 usec
TE 300.0 K
D1 2.00000000 sec
TDO 1
```

```
----- CHANNEL f1 -----
NUC1 1H
P1 8.00 usec
PL1 0.20 dB
PL1W 19.19066429 W
SFO1 600.1330006 MHz
SI 32768
SF 600.1300109 MHz
WDW no
SSB 0
LB 0.00 Hz
GB 0
PC 1.00
```

$^1\text{H}$  NMR (600 MHz,  $\text{CDCl}_3$ ) for compound 5a

13C of JSZ2-196

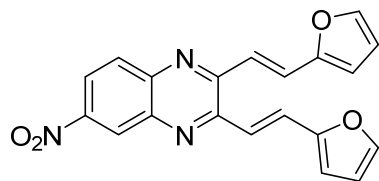

5a

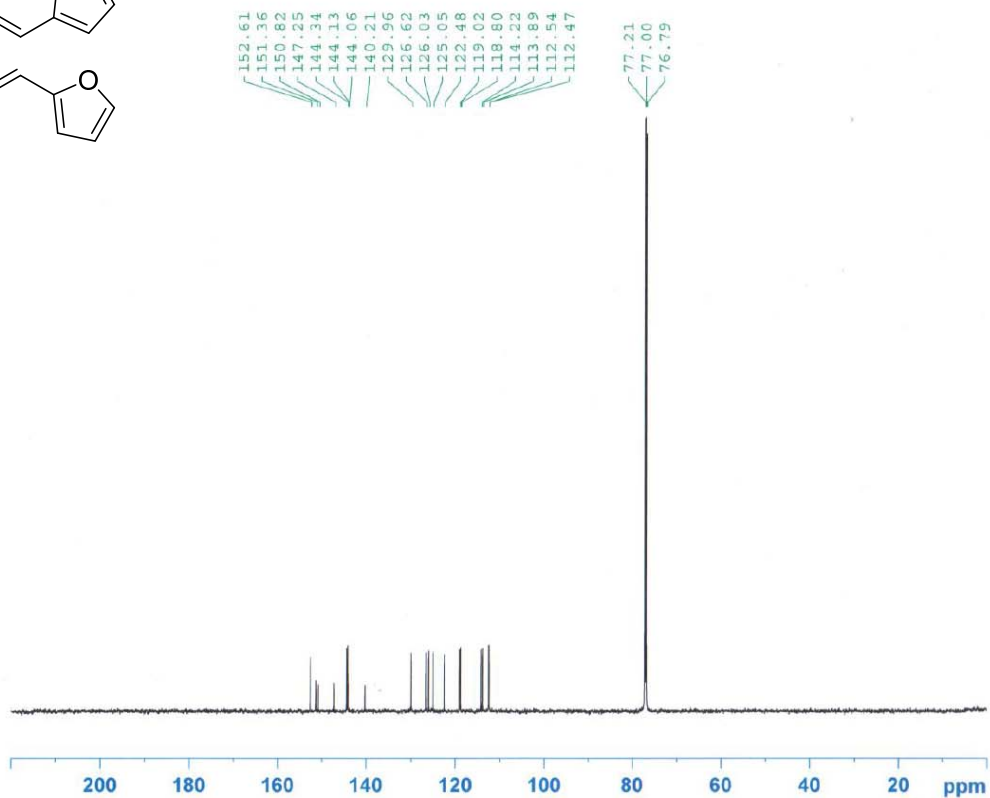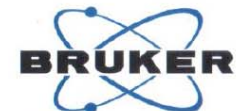

```
NAME JSZ2-196
EXPNO 2
PROCNO 1
Date_ 20220518
Time 10.54
INSTRUM spect
PROBHD 5 mm PABBO BB-
PULPROG zgpg30
TD 65536
SOLVENT CDCl3
NS 601
DS 0
SWH 33333.332 Hz
FIDRES 0.508626 Hz
AQ 0.9831050 sec
RG 16400
DW 15.000 usec
DE 6.00 usec
TE 299.3 K
D1 2.40000010 sec
D11 0.03000000 sec
TDO 1
```

```
===== CHANNEL f1 =====
NUC1 13C
P1 10.00 usec
PL1 -1.60 dB
PL1W 136.15426636 W
SFO1 150.9194083 MHz
```

```
===== CHANNEL f2 =====
CPDPRG2 waltz16
NUC2 1H
PCPD2 90.00 usec
PL2 -1.50 dB
PL12 13.20 dB
PL13 16.20 dB
PL2W 28.38507080 W
PL12W 0.96181160 W
PL13W 0.48204759 W
SFO2 600.1339008 MHz
SI 32768
SF 150.9028089 MHz
WDW EM
SSB 0
LB 3.00 Hz
GB 0
PC 1.00
```

$^{13}\text{C}$  NMR (150 MHz,  $\text{CDCl}_3$ ) for compound 5a

1H of JSZ3-135

8.378  
8.269  
8.243  
8.237  
8.211  
8.072  
8.057  
7.418  
7.410  
7.403  
7.394  
7.375  
7.372  
7.366  
7.358  
7.351  
7.341  
7.260  
7.126  
7.122  
7.120  
7.117  
7.114  
7.108

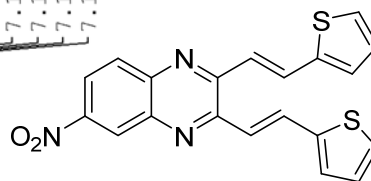

**5b**

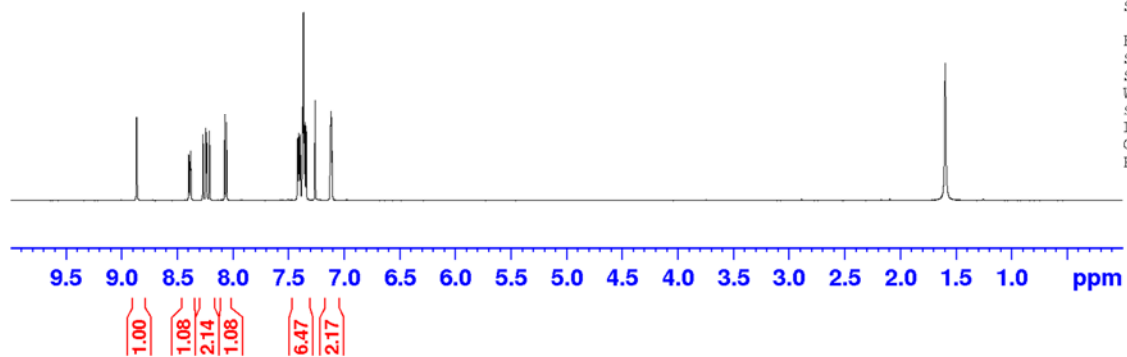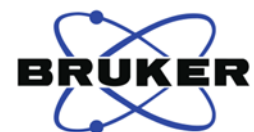

Current Data Parameters  
NAME JSZ3-135  
EXPNO 1  
PROCNO 1

F2 - Acquisition Parameters  
Date\_ 20220513  
Time 13.21  
INSTRUM spect  
PROBHD 5 mm PABBO BB-  
PULPROG zg30  
TD 32768  
SOLVENT CDCl3  
NS 16  
DS 0  
SWH 6613.757 Hz  
FIDRES 0.201836 Hz  
AQ 2.4772608 sec  
RG 3640  
DW 75.600 usec  
DE 6.00 usec  
TE 297.6 K  
D1 2.00000000 sec  
TD0 1

----- CHANNEL f1 -----  
NUC1 1H  
P1 15.00 usec  
PL1 -0.80 dB  
PL1W 24.15961456 W  
SFO1 600.1330006 MHz

F2 - Processing parameters  
SI 32768  
SF 600.1300100 MHz  
WDW no  
SSB 0  
LB 0 Hz  
GB 0  
PC 1.00

<sup>1</sup>H NMR (600 MHz, CDCl<sub>3</sub>) for compound **5b**

13C of JSZ3-135

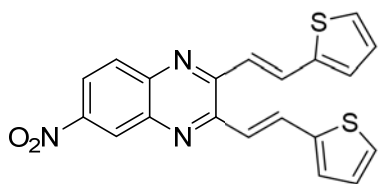

**5b**

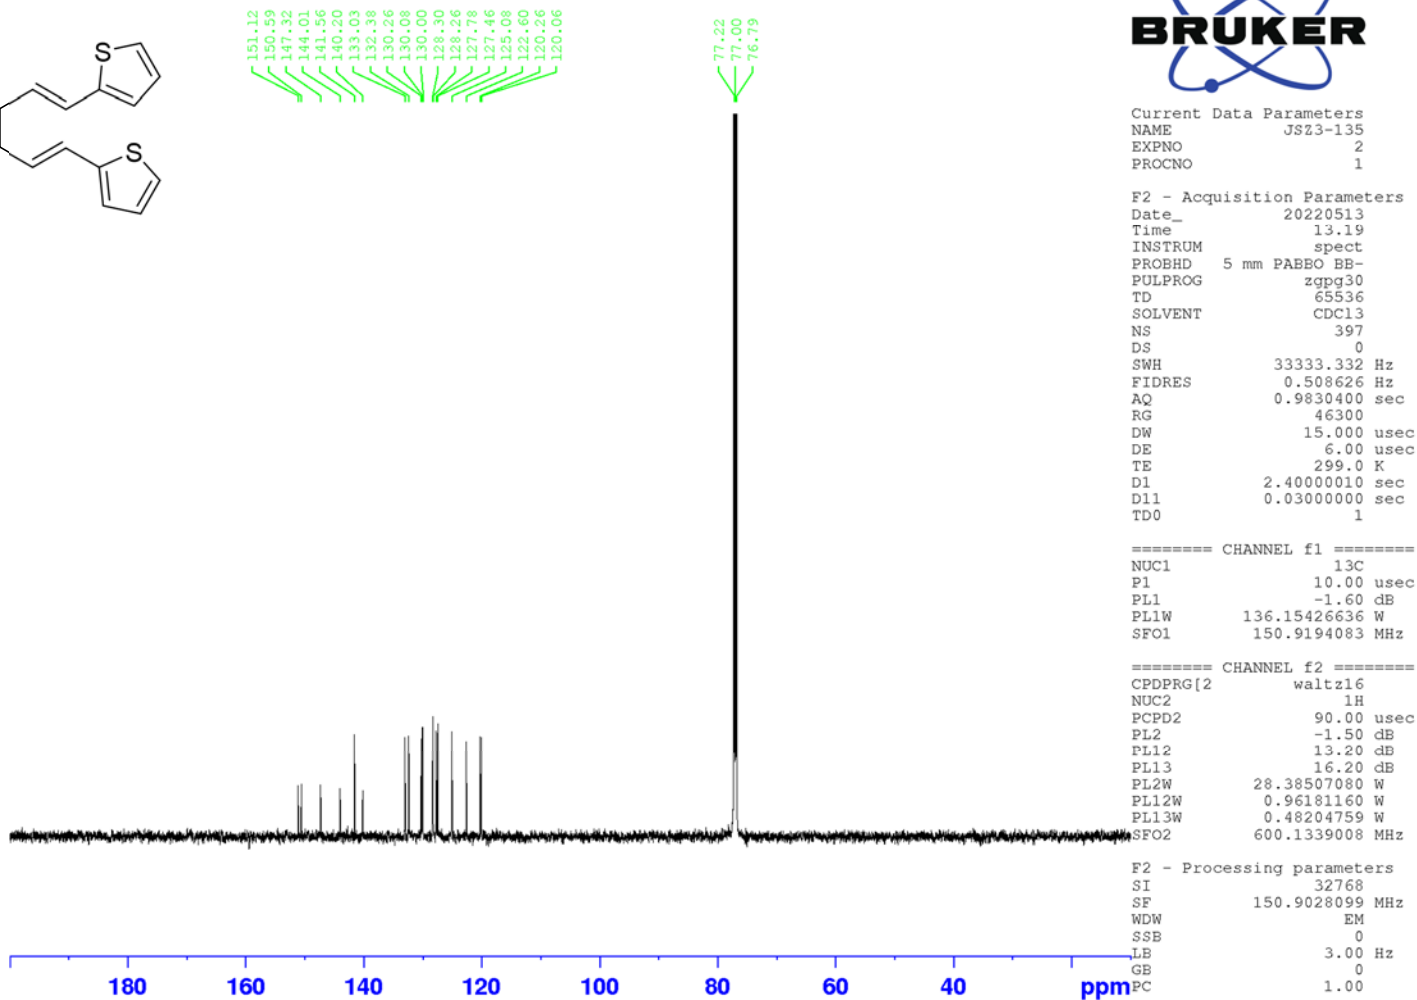

<sup>13</sup>C NMR (150 MHz, CDCl<sub>3</sub>) for compound **5b**



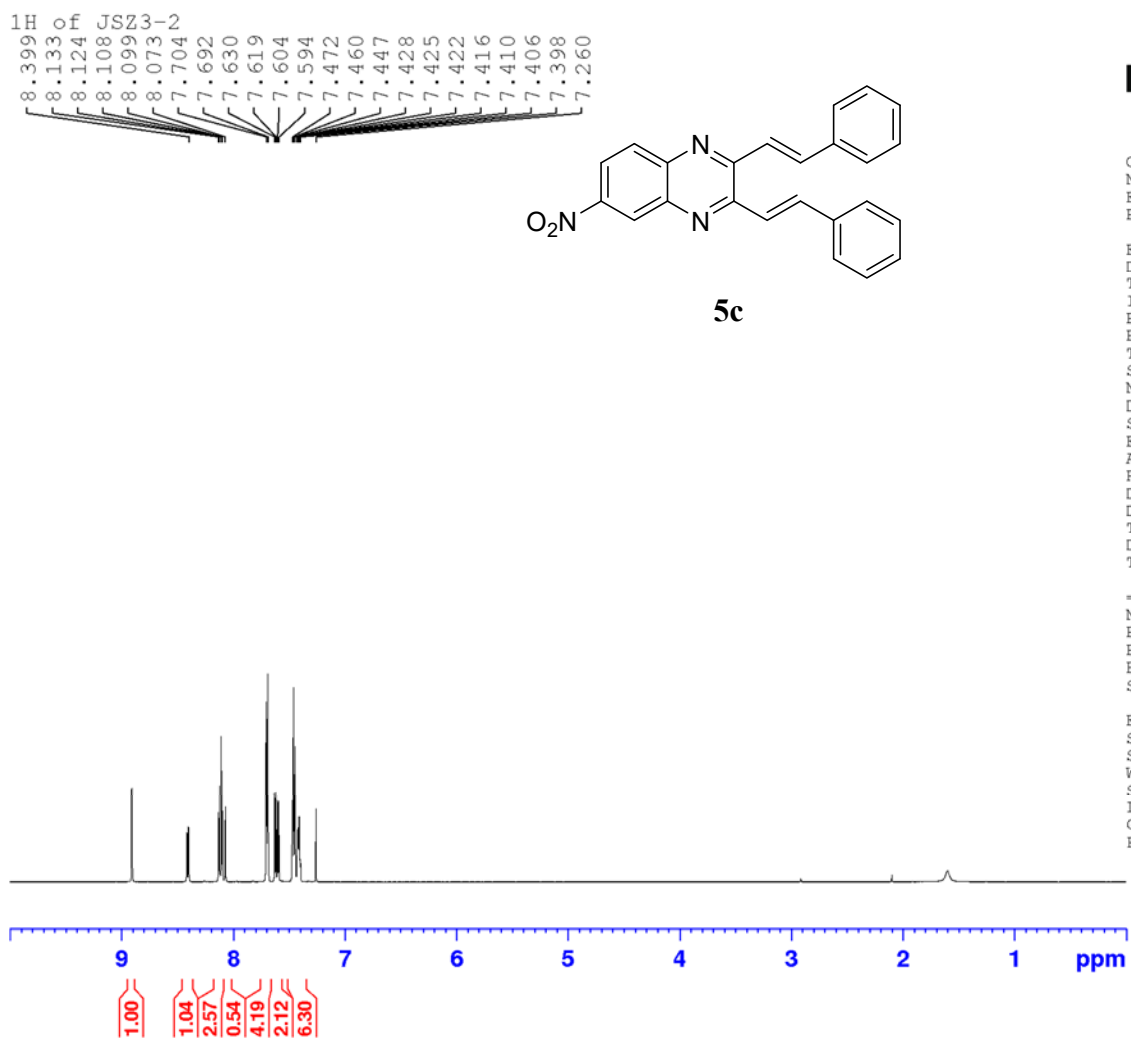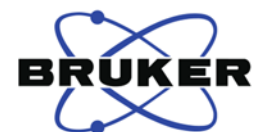

Current Data Parameters  
NAME JSZ3-2  
EXPNO 1  
PROCNO 1

F2 - Acquisition Parameters  
Date\_ 20220523  
Time 11.27  
INSTRUM spect  
PROBHD 5 mm TXI 1H/D-  
PULPROG zg30  
TD 32768  
SOLVENT CDCl3  
NS 16  
DS 0  
SWH 6613.757 Hz  
FIDRES 0.201836 Hz  
AQ 2.4772608 sec  
RG 2300  
DW 75.600 usec  
DE 6.00 usec  
TE 300.1 K  
D1 2.00000000 sec  
TD0 1

----- CHANNEL f1 -----  
NUC1 1H  
P1 8.00 usec  
PL1 0.20 dB  
PL1W 19.19066429 W  
SFO1 600.1330006 MHz

F2 - Processing parameters  
SI 32768  
SF 600.1300107 MHz  
WDW no  
SSB 0  
LB 0 Hz  
GB 0  
EC 1.00

<sup>1</sup>H NMR (600 MHz, CDCl<sub>3</sub>) for compound **5c**

13C of JSZ3-2

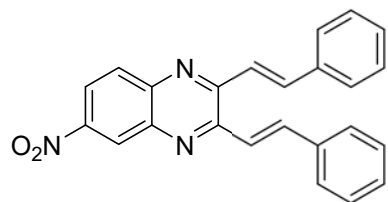

5c

151.64  
151.12  
147.39  
144.03  
140.52  
139.86  
135.96  
130.18  
129.81  
129.67  
128.97  
127.92  
127.84  
125.22  
122.68  
121.44  
121.23

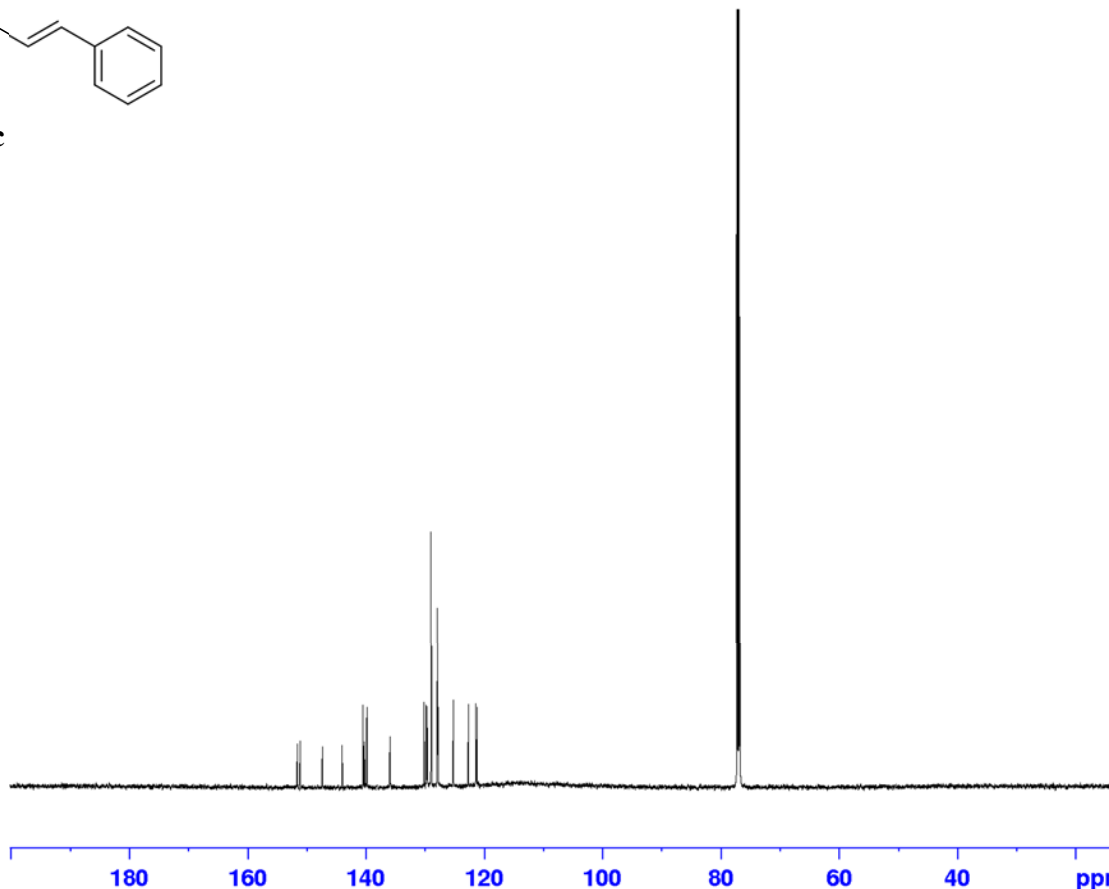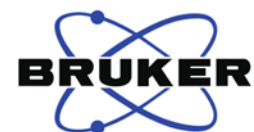

```
Current Data Parameters
NAME          JSZ3-2
EXPNO         2
PROCNO        1

F2 - Acquisition Parameters
Date_         20220523
Time          12.38
INSTRUM       spect
PROBHD        5 mm TXI 1H/D-
PULPROG       zgpg30
TD            65536
SOLVENT       CDCl3
NS            1183
DS            0
SWH           34013.605 Hz
FIDRES        0.519006 Hz
AQ            0.9633792 sec
RG            46300
DW            14.700 usec
DE            6.00 usec
TE            300.1 K
D1            2.40000010 sec
D11           0.03000000 sec
TD0           1

===== CHANNEL f1 =====
NUC1           13C
P1             12.00 usec
PL1            -5.20 dB
PL1W           311.91140747 W
SFO1           150.9194083 MHz

===== CHANNEL f2 =====
CPDPRG[2]     waltz16
NUC2           1H
PCPD2          90.00 usec
PL2            -2.00 dB
PL12           16.00 dB
PL13           21.00 dB
PL2W           31.84857368 W
PL12W          0.31848574 W
PL13W          0.15962099 W
SFO2           600.1339008 MHz

F2 - Processing parameters
SI             32768
SF            150.9028121 MHz
WDW            EM
SSB            0
LB             3.00 Hz
GB            0
PC             1.00
```

<sup>13</sup>C NMR (150 MHz, CDCl<sub>3</sub>) for compound 5c

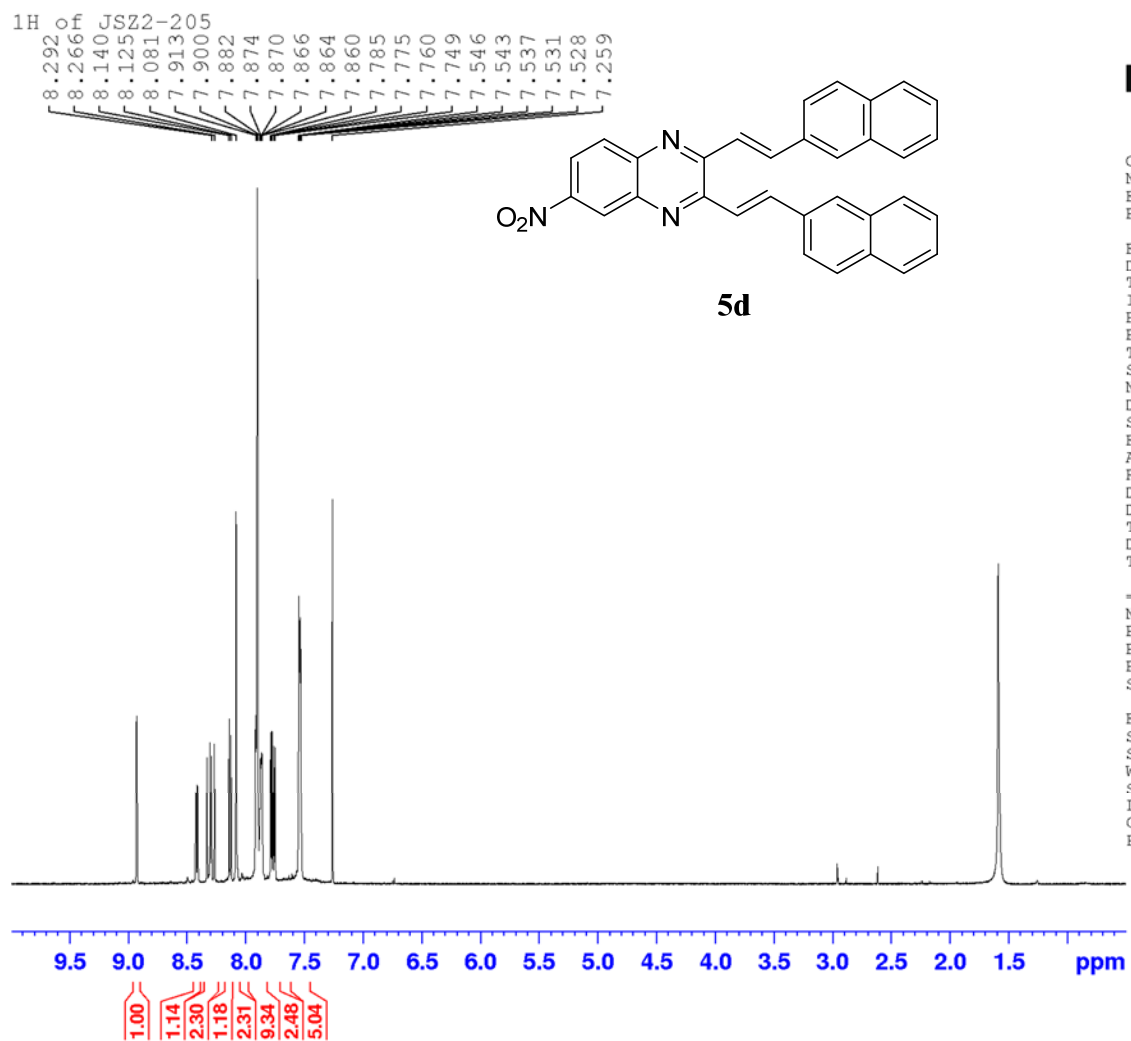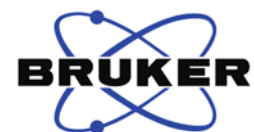

Current Data Parameters  
 NAME JSZ2-205  
 EXPNO 1  
 PROCNO 1

F2 - Acquisition Parameters  
 Date\_ 20220428  
 Time 14.57  
 INSTRUM spect  
 PROBHD 5 mm PABBO BB-  
 PULPROG zg30  
 TD 32768  
 SOLVENT CDCl3  
 NS 16  
 DS 0  
 SWH 7183.908 Hz  
 FIDRES 0.219235 Hz  
 AQ 2.2806528 sec  
 RG 2890  
 DW 69.600 usec  
 DE 6.00 usec  
 TE 296.4 K  
 D1 2.0000000 sec  
 TD0 1

----- CHANNEL f1 -----  
 NUC1 1H  
 P1 15.00 usec  
 PL1 -0.80 dB  
 PL1W 24.15961456 W  
 SF01 600.1336008 MHz

F2 - Processing parameters  
 SI 32768  
 SF 600.1300104 MHz  
 WDW no  
 SSR 0  
 LB 0 Hz  
 GB 0  
 PC 1.00

<sup>1</sup>H NMR (600 MHz, CDCl<sub>3</sub>) for compound **5d**

13C of JSZ2-205

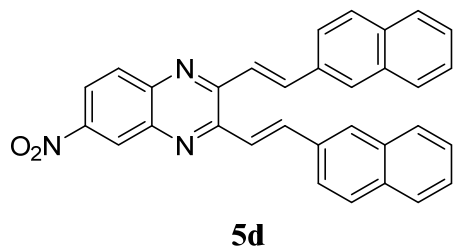

151.71  
151.19  
147.41  
144.10  
140.66  
140.31  
139.99  
134.04  
133.97  
133.52  
133.47  
133.44  
130.18  
129.65  
129.49  
128.75  
128.72  
128.53  
127.83  
127.11  
127.03  
126.77  
126.74  
125.23  
123.58  
122.69  
121.61  
121.41

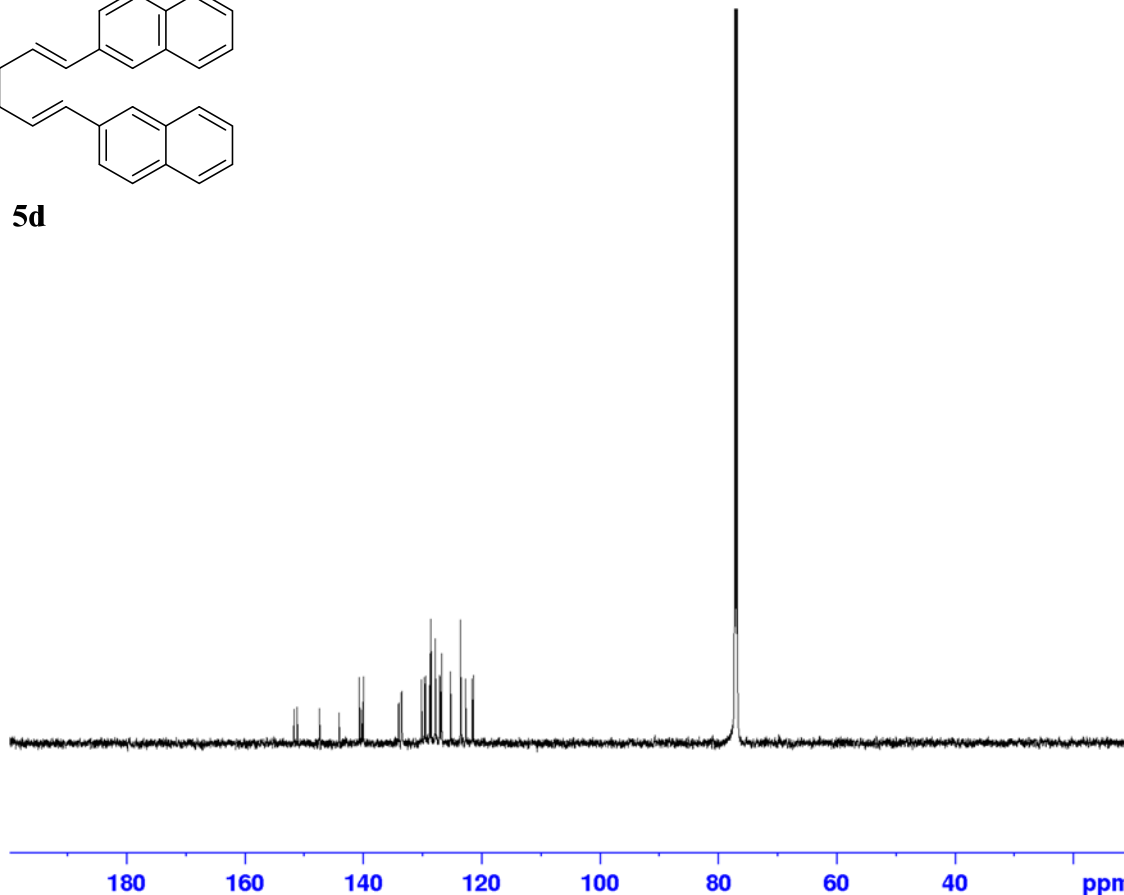

<sup>13</sup>C NMR (150 MHz, CDCl<sub>3</sub>) for compound **5d**

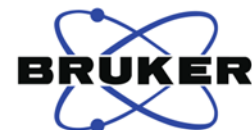

Current Data Parameters  
NAME JSZ2-205  
EXPNO 2  
PROCNO 1

F2 - Acquisition Parameters  
Date\_ 20220428  
Time 14.14  
INSTRUM spect  
PROBHD 5 mm PABBO BB-  
PULPROG zgpg30  
TD 65536  
SOLVENT CDCl3  
NS 1509  
DS 0  
SWH 34013.605 Hz  
FIDRES 0.519006 Hz  
AQ 0.9633792 sec  
RG 46300  
DW 14.700 usec  
DE 6.00 usec  
TE 299.1 K  
D1 2.4000010 sec  
D11 0.03000000 sec  
TD0 1

=====  
CHANNEL f1  
NUC1 13C  
P1 10.00 usec  
PL1 -1.60 dB  
PL1W 136.15426636 W  
SFO1 150.9194083 MHz

=====  
CHANNEL f2  
CPDPRG[2] waltz16  
NUC2 1H  
PCPD2 90.00 usec  
PL2 -1.50 dB  
PL12 13.20 dB  
PL13 16.20 dB  
PL2W 28.38507080 W  
PL12W 0.96181160 W  
PL13W 0.48204759 W  
SFO2 600.1339008 MHz

F2 - Processing parameters  
SI 32768  
SF 150.9028099 MHz  
WDW EM  
SSB 0  
LB 3.00 Hz  
GB 0  
PC 1.00

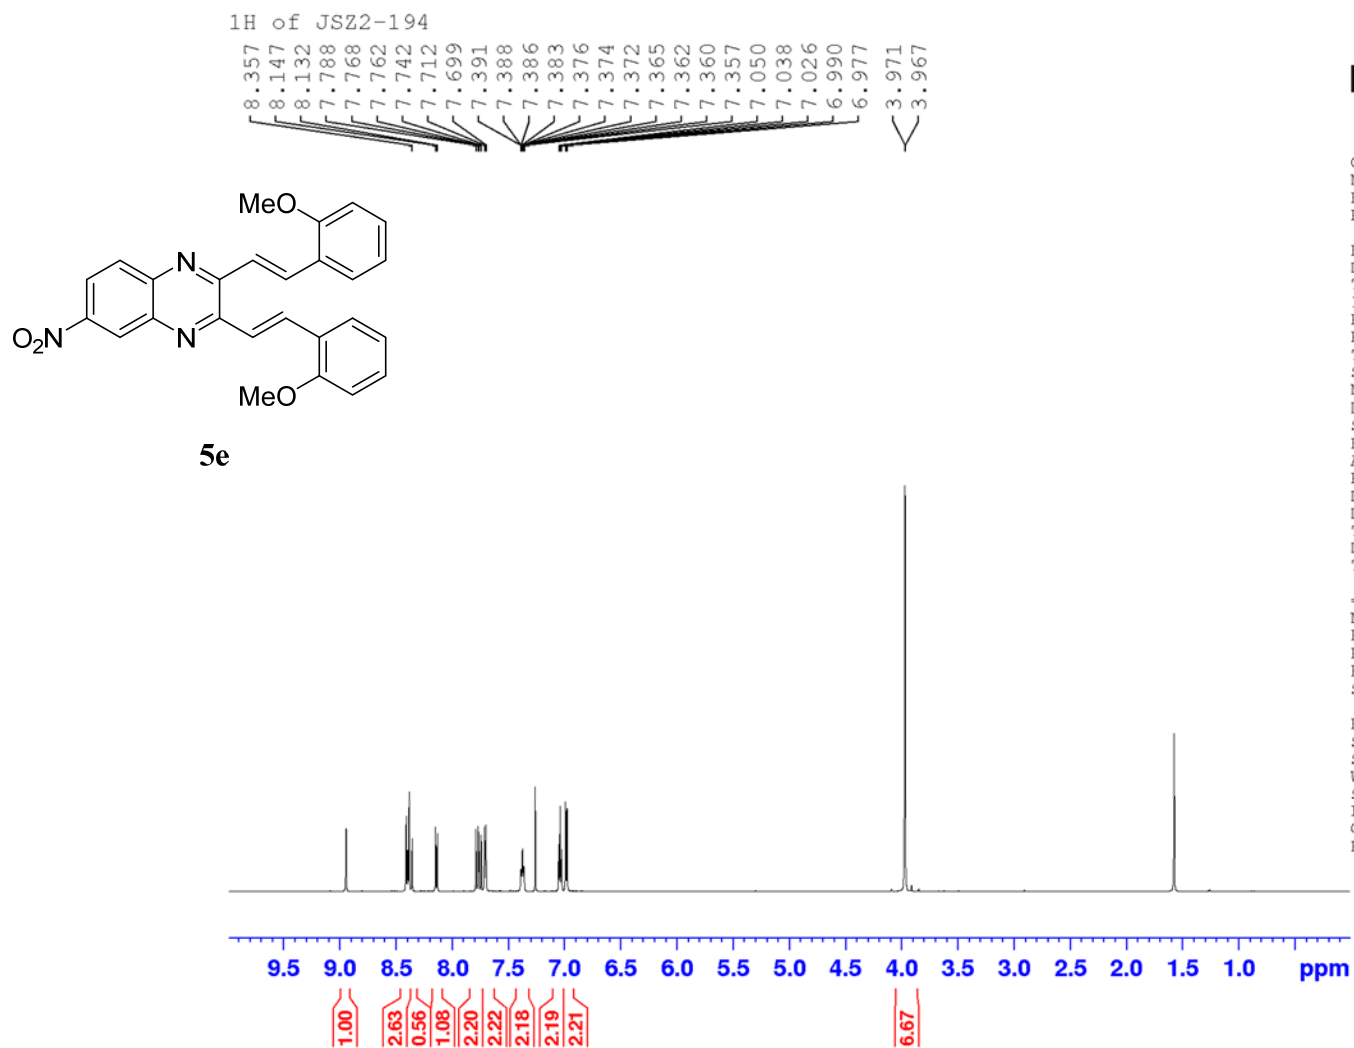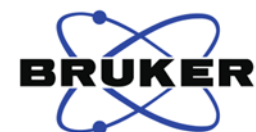

Current Data Parameters  
 NAME JSZ2-194  
 EXPNO 1  
 PROCNO 1

F2 - Acquisition Parameters  
 Date\_ 20220509  
 Time 10.40  
 INSTRUM spect  
 PROBHD 5 mm TXI 1H/D-  
 PULPROG zg30  
 TD 32768  
 SOLVENT CDCl3  
 NS 16  
 DS 0  
 SWH 6613.757 Hz  
 FIDRES 0.201836 Hz  
 AQ 2.4772608 sec  
 RG 1150  
 DW 75.600 usec  
 DE 6.00 usec  
 TE 300.0 K  
 D1 2.00000000 sec  
 TD0 1

===== CHANNEL f1 =====  
 NUC1 1H  
 P1 8.00 usec  
 PL1 0.20 dB  
 PL1W 19.19066429 W  
 SFO1 600.1330006 MHz

F2 - Processing parameters  
 SI 32768  
 SF 600.1300108 MHz  
 WDW EM  
 SSB 0  
 LB 0 Hz  
 GB 0  
 PC 1.00

<sup>1</sup>H NMR (600 MHz, CDCl<sub>3</sub>) for compound **5e**

13C of JSZ2-194

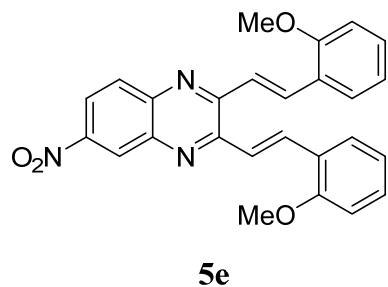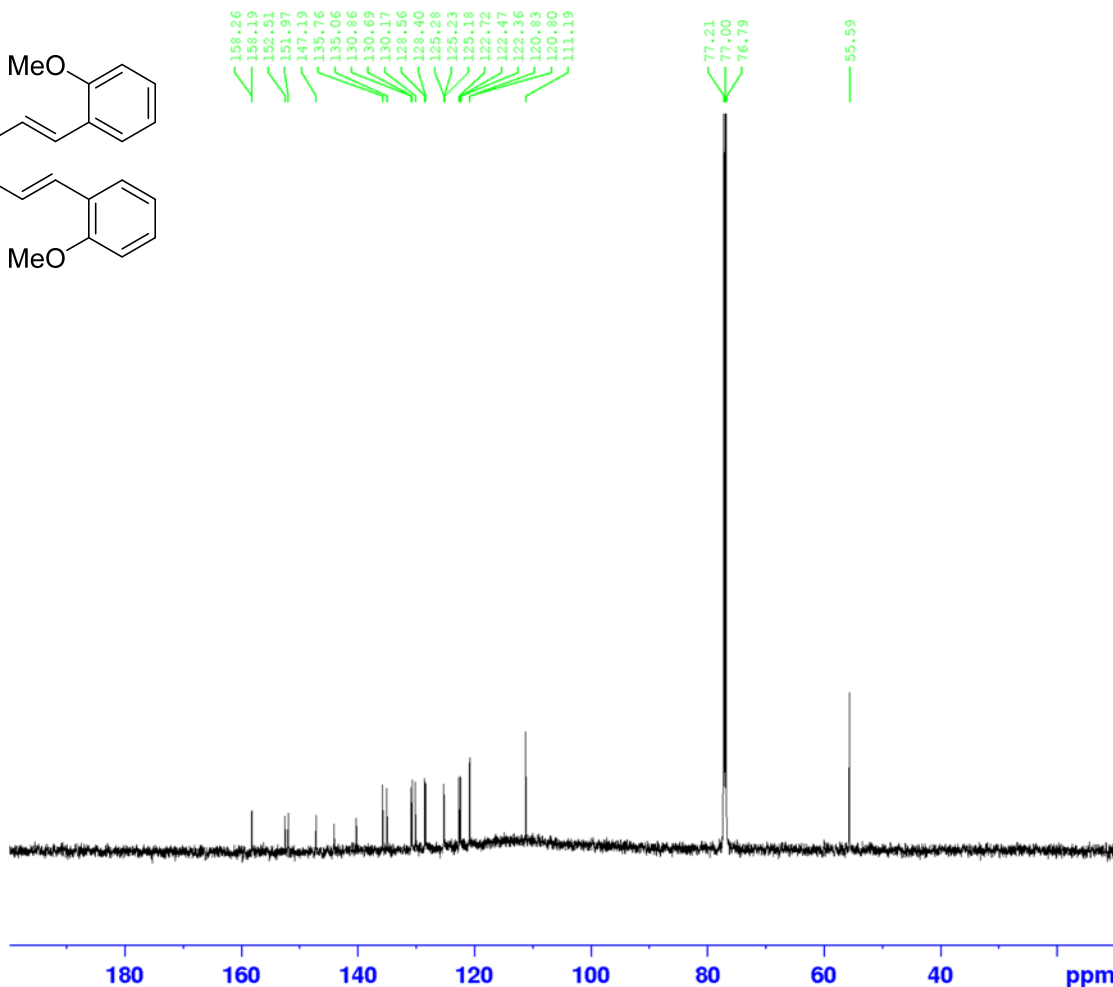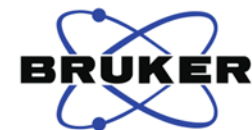

Current Data Parameters  
NAME JSZ2-194  
EXPNO 2  
PROCNO 1

F2 - Acquisition Parameters  
Date\_ 20220509  
Time 10.51  
INSTRUM spect  
PROBHD 5 mm TXI 1H/D-  
PULPROG zgpg30  
TD 65536  
SOLVENT CDCl3  
NS 691  
DS 0  
SWH 34013.605 Hz  
FIDRES 0.519006 Hz  
AQ 0.9633792 sec  
RG 23100  
DW 14.700 usec  
DE 6.00 usec  
TE 300.0 K  
D1 2.4000010 sec  
D11 0.03000000 sec  
TD0 1

===== CHANNEL f1 =====  
NUC1 13C  
P1 12.00 usec  
PL1 -5.20 dB  
PL1W 311.91140747 W  
SFO1 150.9194083 MHz

===== CHANNEL f2 =====  
CPDPRG[2] waltz16  
NUC2 1H  
PCPD2 90.00 usec  
PL2 -2.00 dB  
PL12 10.00 dB  
PL13 21.00 dB  
PL2W 31.84857368 W  
PL12W 0.31848574 W  
PL13W 0.15962099 W  
SFO2 600.1339008 MHz

F2 - Processing parameters  
SI 32768  
SF 150.9028110 MHz  
WDW EM  
SSB 0  
LB 3.00 Hz  
GB 0  
PC 1.00

<sup>13</sup>C NMR (150 MHz, CDCl<sub>3</sub>) for compound **5e**

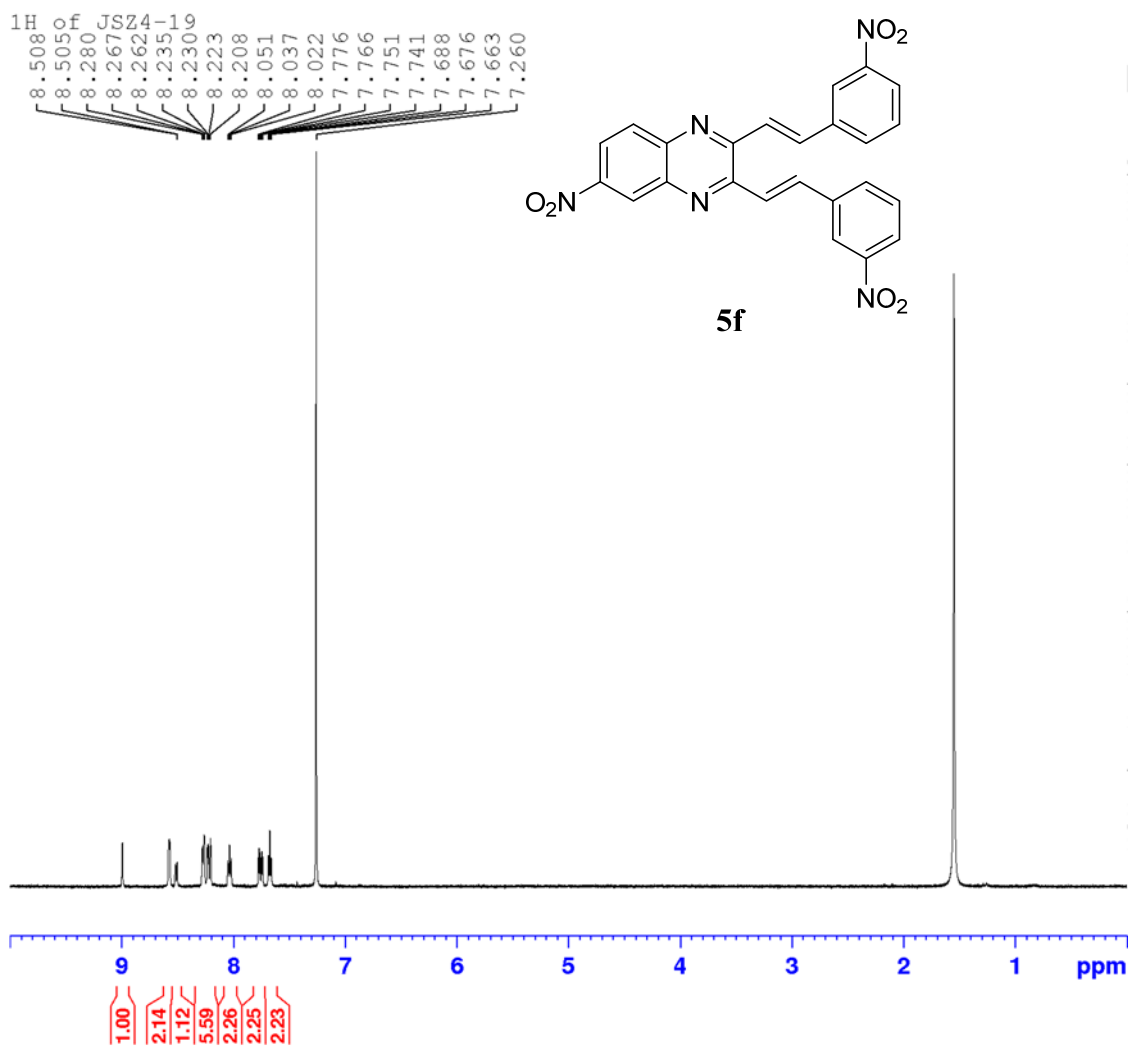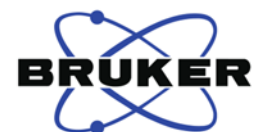

Current Data Parameters  
 NAME JS24-19  
 EXPNO 11  
 PROCNO 1

F2 - Acquisition Parameters  
 Date\_ 20220606  
 Time 13.38  
 INSTRUM spect  
 PROBHD 5 mm PABBO BB-  
 PULPROG zg30  
 TD 32768  
 SOLVENT CDC13  
 NS 32  
 DS 0  
 SWH 6613.757 Hz  
 FIDRES 0.201836 Hz  
 AQ 2.4772608 sec  
 RG 16400  
 DW 75.600 usec  
 DE 6.00 usec  
 TE 297.7 K  
 D1 2.00000000 sec  
 TD0 1

----- CHANNEL f1 -----  
 NUC1 1H  
 P1 15.00 usec  
 PL1 -0.80 dB  
 PL1W 24.15961456 W  
 SFO1 600.1330006 MHz

F2 - Processing parameters  
 SI 32768  
 SF 600.1300099 MHz  
 WDW EM  
 SSB 0  
 LB 0 Hz  
 GB 0  
 PC 1.00

<sup>1</sup>H NMR (600 MHz, CDCl<sub>3</sub>) for compound **5f**

13C of JSZ3-2

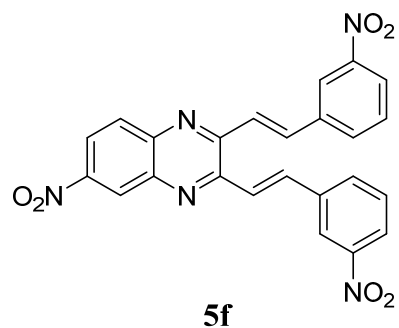

150.64  
150.13  
148.89  
148.00  
144.14  
140.60  
138.20  
137.62  
137.53  
133.65  
133.49  
130.57  
130.08  
125.44  
124.15  
124.04  
124.00  
123.82  
123.47  
122.44  
122.18

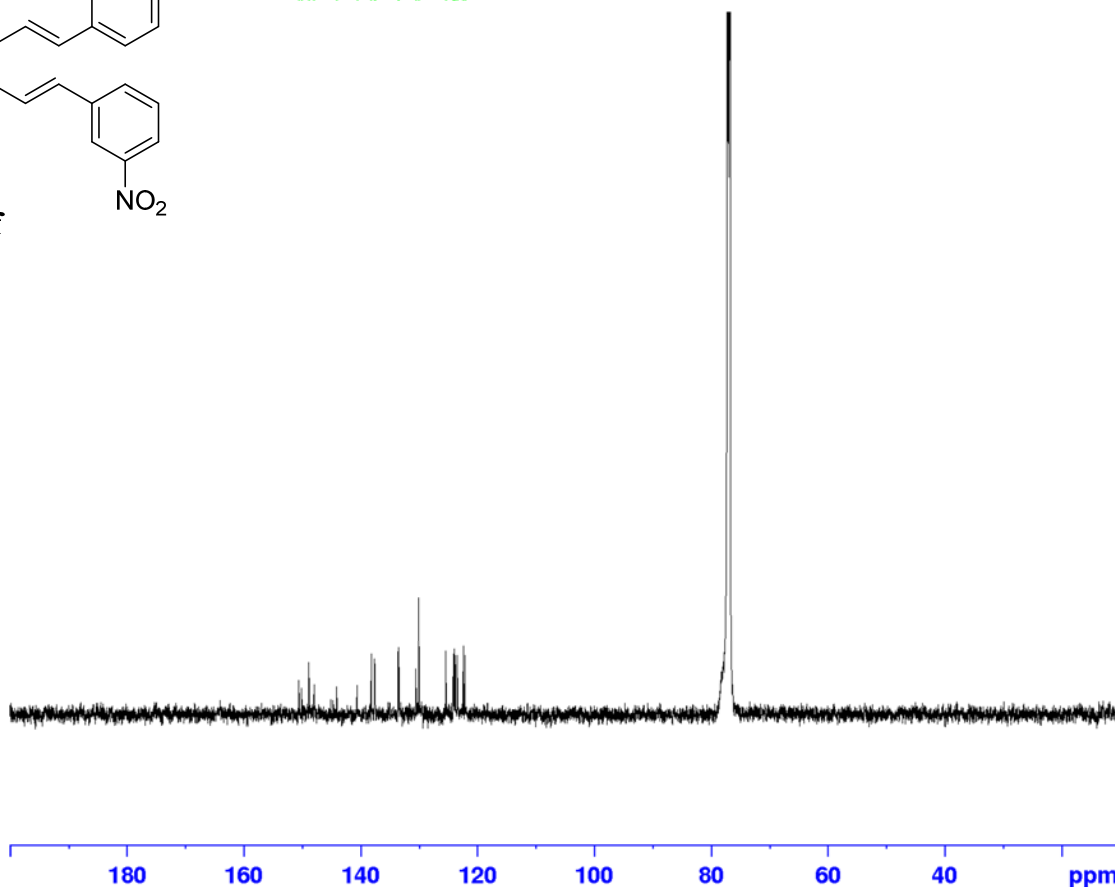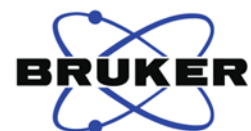

Current Data Parameters  
NAME JSZ4-19  
EXPNO 12  
PROCNO 1

F2 - Acquisition Parameters  
Date\_ 20220607  
Time 8.10  
INSTRUM spect  
PROBHD 5 mm PABBO BB-  
PULPROG zgpg30  
TD 65536  
SOLVENT CDCl3  
NS 19354  
DS 0  
SWH 33333.332 Hz  
FIDRES 0.508626 Hz  
AQ 0.9830400 sec  
RG 46300  
DW 15.000 usec  
DE 6.00 usec  
TE 300.1 K  
D1 2.4000010 sec  
D11 0.03000000 sec  
TD0 1

==== CHANNEL f1 =====  
NUC1 13C  
P1 10.00 usec  
PL1 -1.60 dB  
PL1W 136.15426636 W  
SFO1 150.9194083 MHz

==== CHANNEL f2 =====  
CPDPRG[2] waltz16  
NUC2 1H  
PCPD2 90.00 usec  
PL2 -1.50 dB  
PL12 13.20 dB  
PL13 16.20 dB  
PL2W 28.38507080 W  
PL12W 0.96181160 W  
PL13W 0.48204759 W  
SFO2 600.1339008 MHz

F2 - Processing parameters  
SI 32768  
SF 150.9028076 MHz  
WDW EM  
SSB 0  
LB 3.00 Hz  
GB 0  
PC 1.00

<sup>13</sup>C NMR (150 MHz, CDCl<sub>3</sub>) for compound 5f



1H  
 8.928  
 8.453  
 8.438  
 8.151  
 8.136  
 8.095  
 8.069  
 8.062  
 8.035  
 7.688  
 7.615  
 7.604  
 7.587  
 7.577  
 7.441  
 7.399  
 7.387  
 7.258

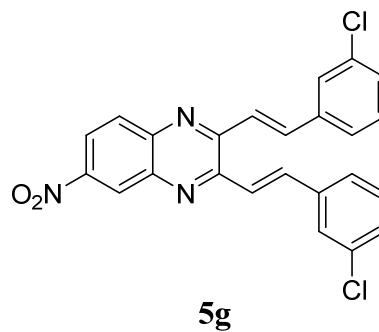

— 1.583

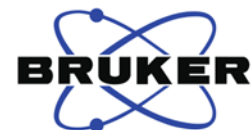

Current Data Parameters  
 NAME JSZ3-17  
 EXPNO 1  
 PROCNO 1

F2 - Acquisition Parameters  
 Date\_ 20220513  
 Time 11.20  
 INSTRUM spect  
 PROBHD 5 mm TXI 1H/D-  
 PULPROG zg30  
 TD 32768  
 SOLVENT CDCl3  
 NS 16  
 DS 0  
 SWH 6009.615 Hz  
 FIDRES 0.183399 Hz  
 AQ 2.7262976 sec  
 RG 2050  
 DW 83.200 usec  
 DE 6.00 usec  
 TE 300.1 K  
 D1 2.00000000 sec  
 TD0 1

----- CHANNEL f1 -----  
 NUC1 1H  
 P1 8.00 usec  
 PL1 0.20 dB  
 PL1W 19.19066429 W  
 SFO1 600.1330006 MHz

F2 - Processing parameters  
 SI 32768  
 SF 600.1300121 MHz  
 WDW no  
 SSB 0  
 LB 0 Hz  
 GB 0  
 PC 1.00

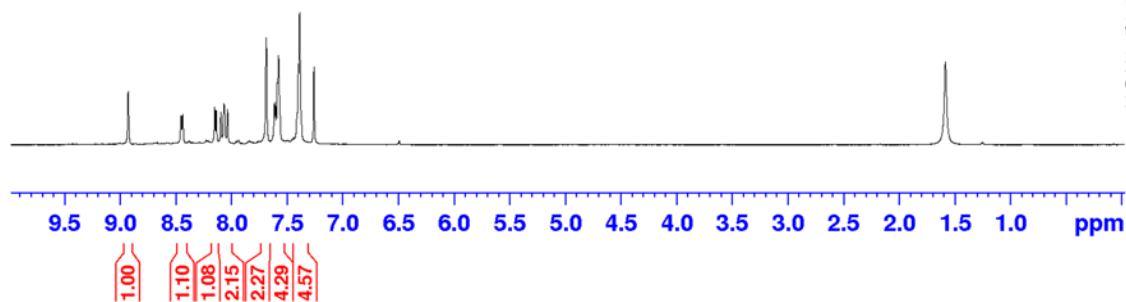

<sup>1</sup>H NMR (600 MHz, CDCl<sub>3</sub>) for compound **5g**

<sup>13</sup>C of JSZ3-17

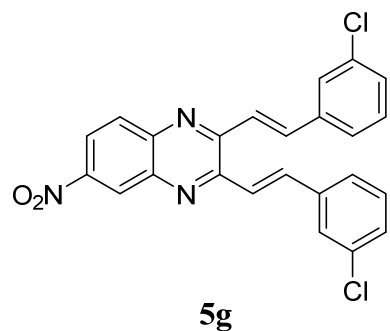

151.12  
150.60  
147.65  
144.06  
140.39  
139.17  
138.55  
137.72  
137.67  
135.03  
130.35  
130.23  
129.71  
129.59  
127.67  
127.52  
126.17  
125.31  
123.02  
122.55  
122.35

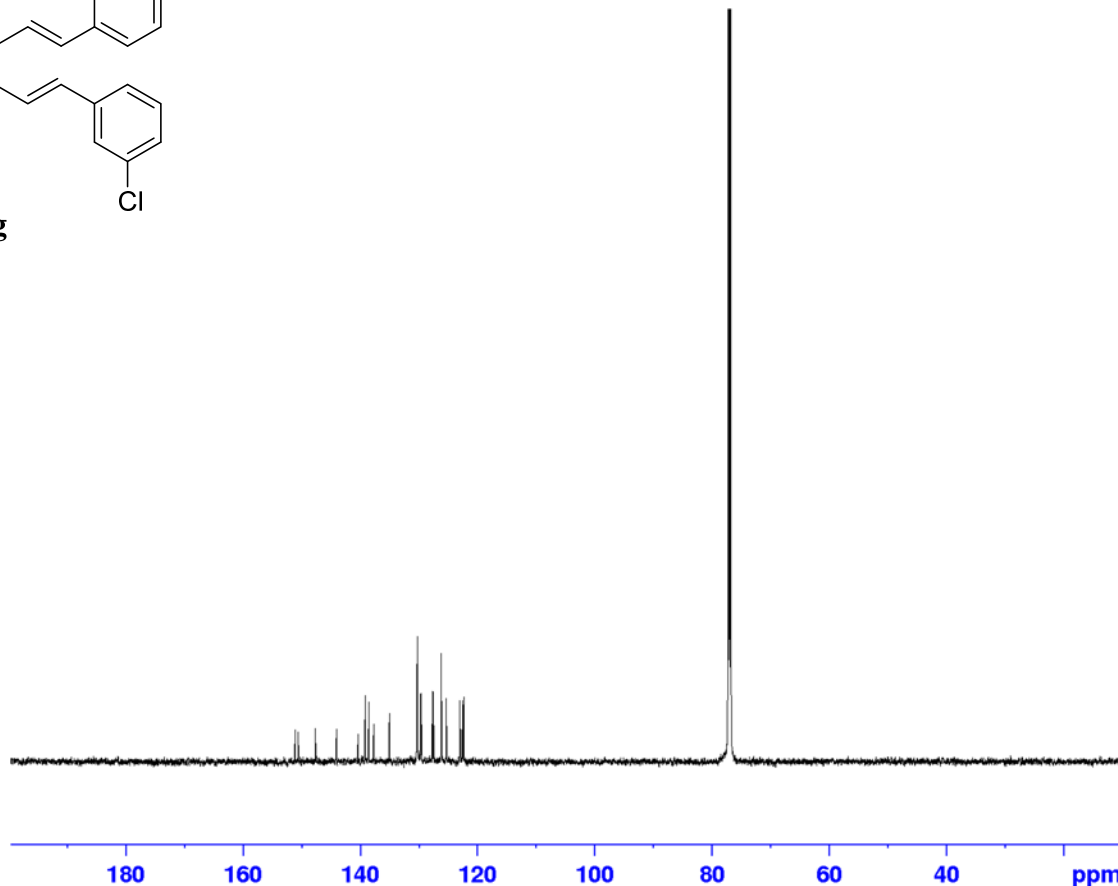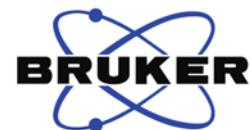

Current Data Parameters  
NAME JSZ3-17  
EXPNO 2  
PROCNO 1

F2 - Acquisition Parameters  
Date\_ 20220513  
Time 13.09  
INSTRUM spect  
PROBHD 5 mm PABBO BB-  
PULPROG zgpg30  
TD 65536  
SOLVENT CDCl3  
NS 1643  
DS 0  
SWH 33333.332 Hz  
FIDRES 0.508626 Hz  
AQ 0.9830400 sec  
RG 46300  
DW 15.000 usec  
DE 6.00 usec  
TE 299.3 K  
D1 2.40000010 sec  
D11 0.03000000 sec  
TD0 1

=====  
CHANNEL f1  
NUC1 13C  
P1 10.00 usec  
PL1 -1.60 dB  
PL1W 136.15426636 W  
SFO1 150.9194083 MHz

=====  
CHANNEL f2  
CPDPRG[2] waltz16  
NUC2 1H  
PCPD2 90.00 usec  
PL2 -1.50 dB  
PL12 13.20 dB  
PL13 16.20 dB  
PL2W 28.38507080 W  
PL12W 0.96181160 W  
PL13W 0.48204759 W  
SFO2 600.1339008 MHz

F2 - Processing parameters  
SI 32768  
SF 150.9028099 MHz  
WDW EM  
SSB 0  
LB 3.00 Hz  
GB 0  
PC 1.00

<sup>13</sup>C NMR (150 MHz, CDCl<sub>3</sub>) for compound **5g**

1H  
 8.9460  
 8.4566  
 8.440  
 8.157  
 8.140  
 8.111  
 8.101  
 8.075  
 7.703  
 7.572  
 7.559  
 7.547  
 7.534  
 7.260  
 7.173  
 7.159  
 7.145

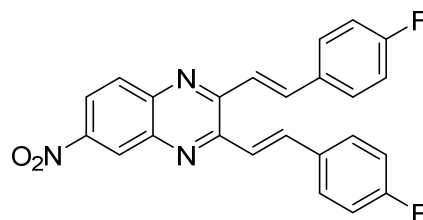

**5h**



Current Data Parameters  
 NAME JSZ3-11  
 EXPNO 1  
 PROCNO 1

F2 - Acquisition Parameters  
 Date\_ 20220530  
 Time 14.31  
 INSTRUM spect  
 PROBHD 5 mm PABBO BB-  
 PULPROG zg30  
 TD 32768  
 SOLVENT CDCl3  
 NS 32  
 DS 0  
 SWH 6613.757 Hz  
 FIDRES 0.201836 Hz  
 AQ 2.4772608 sec  
 RG 11500  
 DW 75.600 usec  
 DE 6.00 usec  
 TE 297.5 K  
 D1 2.00000000 sec  
 TD0 1

----- CHANNEL f1 -----  
 NUC1 1H  
 P1 15.00 usec  
 PL1 -0.80 dB  
 PL1W 24.15961456 W  
 SF01 600.1330006 MHz

F2 - Processing parameters  
 SI 32768  
 SF 600.1300102 MHz  
 WDW no  
 SSR 0  
 LB 0 Hz  
 GB 0  
 PC 1.00

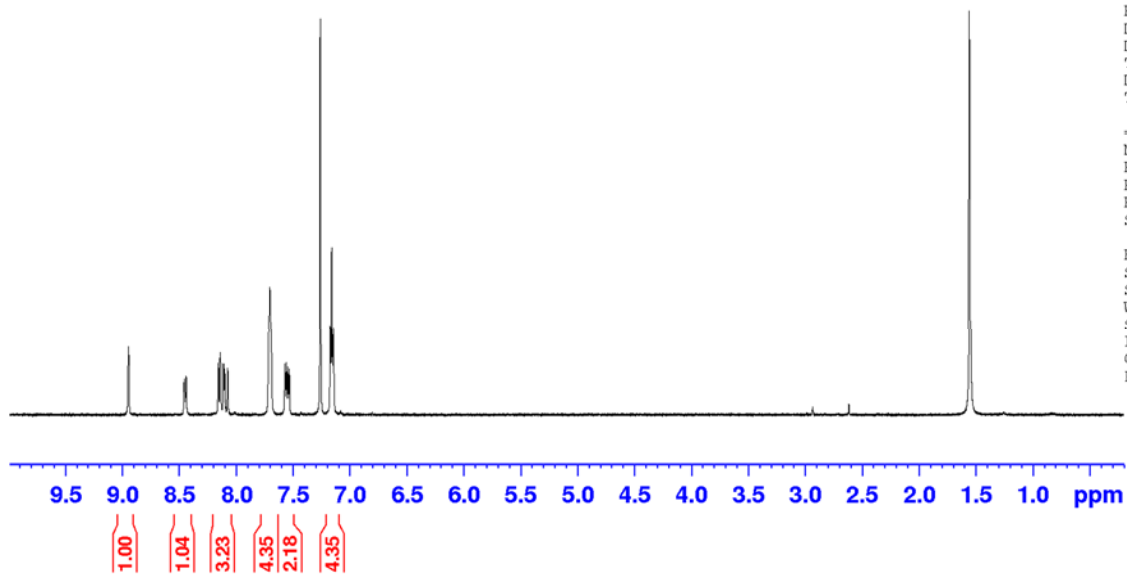

<sup>1</sup>H NMR (600 MHz, CDCl<sub>3</sub>) for compound **5h**

<sup>13</sup>C of JSZ3-11

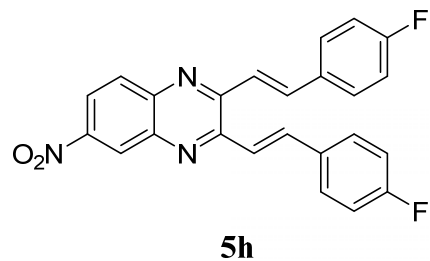

167.01  
164.49  
164.41  
162.83  
162.75  
151.48  
150.88  
147.53  
144.04  
140.32  
139.40  
138.72  
132.22  
130.21  
129.75  
129.70  
129.65  
129.59  
125.23  
122.83  
121.12  
120.93  
118.21  
116.18  
116.07  
116.04

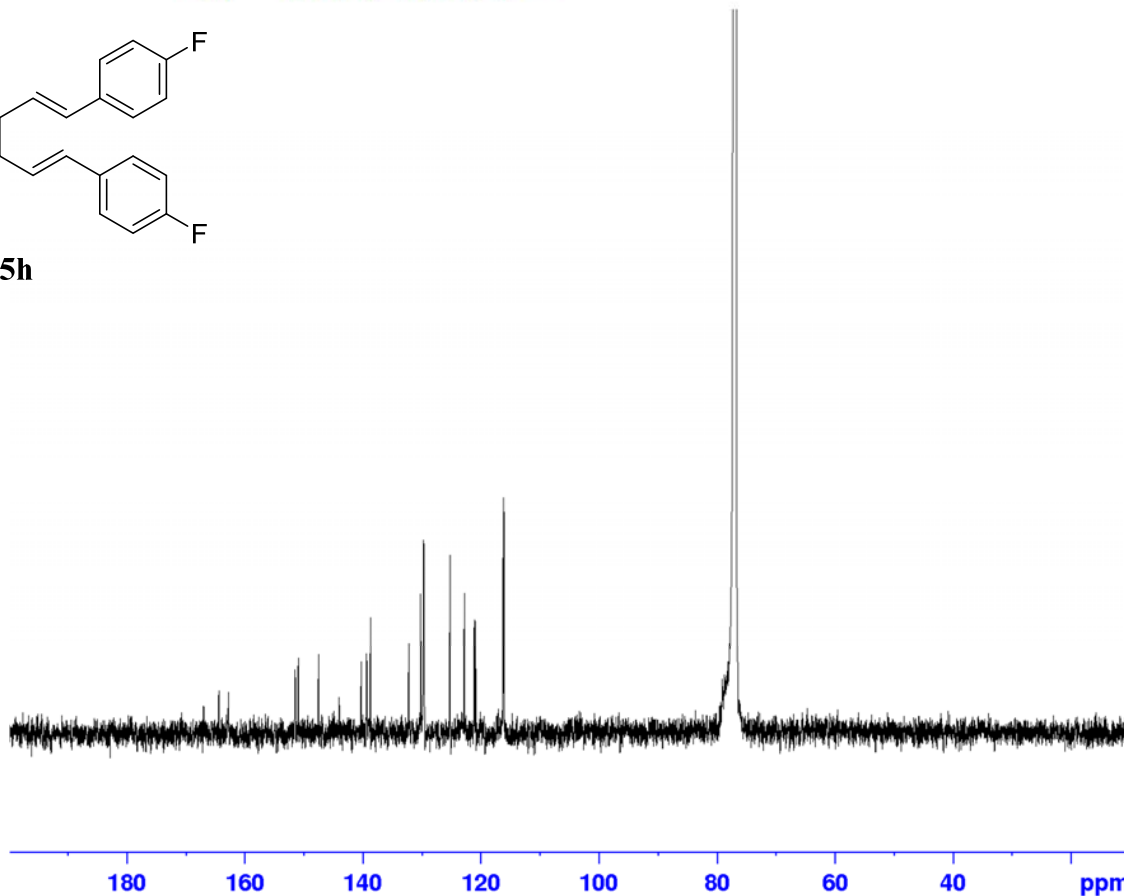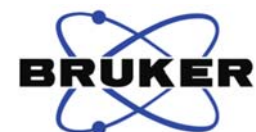

Current Data Parameters  
NAME JSZ3-11  
EXPNO 2  
PROCNO 1

F2 - Acquisition Parameters  
Date\_ 20220530  
Time 14.55  
INSTRUM spect  
PROBHD 5 mm PABBO BB-  
PULPROG zgpg30  
TD 65536  
SOLVENT CDCl3  
NS 18400  
DS 0  
SWH 33333.332 Hz  
FIDRES 0.508626 Hz  
AQ 0.9830400 sec  
RG 46300  
DW 15.000 usec  
DE 6.00 usec  
TE 299.9 K  
D1 2.40000010 sec  
D11 0.03000000 sec  
TD0 1

===== CHANNEL f1 =====  
NUC1 13C  
P1 10.00 usec  
PL1 -1.60 dB  
PL1W 136.15426636 W  
SFO1 150.9194083 MHz

===== CHANNEL f2 =====  
CPDPRG[2] waltz16  
NUC2 1H  
PCPD2 90.00 usec  
PL2 -1.50 dB  
PL12 13.20 dB  
PL13 16.20 dB  
PL2W 28.38507080 W  
PL12W 0.96181160 W  
PL13W 0.48204759 W  
SFO2 600.1339008 MHz

F2 - Processing parameters  
SI 32768  
SF 150.9028099 MHz  
WDW EM  
SSB 0  
LB 3.00 Hz  
GB 0  
PC 1.00

<sup>13</sup>C NMR (150 MHz, CDCl<sub>3</sub>) for compound **5h**

<sup>1</sup>H  
 8.932  
 8.450  
 8.437  
 8.147  
 8.132  
 8.110  
 8.084  
 8.077  
 8.051  
 7.643  
 7.631  
 7.603  
 7.591  
 7.577  
 7.566  
 7.438  
 7.426  
 7.259

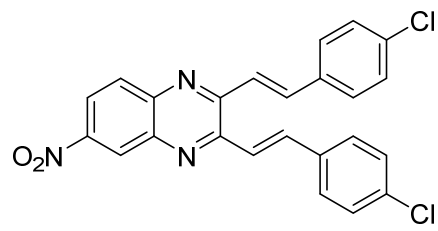

**5i**

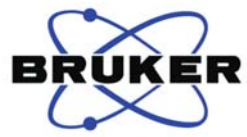

Current Data Parameters  
 NAME JSZ3-16  
 EXPNO 1  
 PROCNO 1

F2 - Acquisition Parameters  
 Date\_ 20220606  
 Time 10.35  
 INSTRUM spect  
 PROBHD 5 mm PABBO BB-  
 PULPROG zg30  
 TD 32768  
 SOLVENT CDC13  
 NS 16  
 DS 0  
 SWH 6613.757 Hz  
 FIDRES 0.201836 Hz  
 AQ 2.4772608 sec  
 RG 5790  
 DW 75.600 usec  
 DE 6.00 usec  
 TE 298.9 K  
 D1 2.00000000 sec  
 TD0 1

CHANNEL f1  
 NUC1 <sup>1</sup>H  
 P1 10.00 usec  
 PL1 -2.70 dB  
 PL1W 37.41881180 W  
 SFO1 600.1330006 MHz

F2 - Processing parameters  
 SI 32768  
 SF 600.1300098 MHz  
 WDW no  
 SSB 0  
 LB 0 Hz  
 GB 0  
 PC 1.00

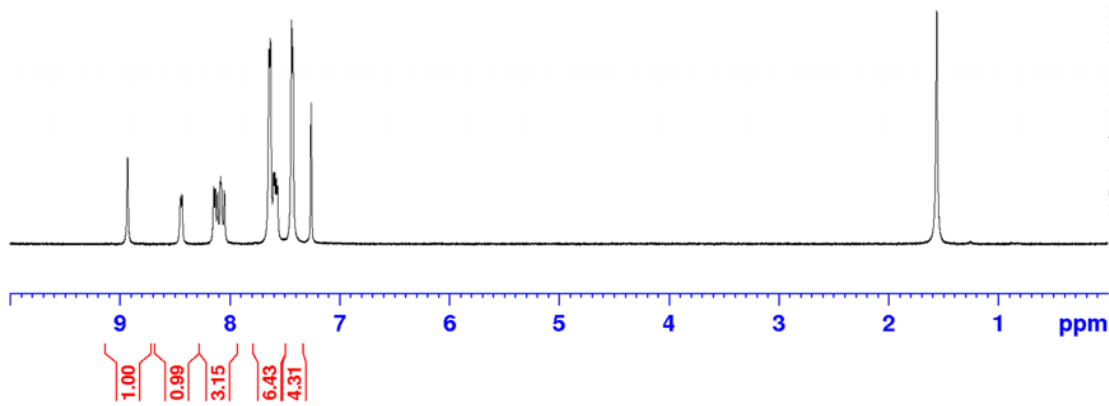

<sup>1</sup>H NMR (600 MHz, CDCl<sub>3</sub>) for compound **5i**

13C of JSZ3-16

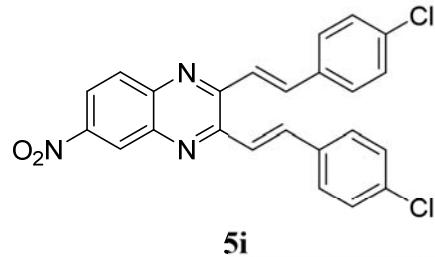

151.32  
150.80  
147.61  
146.07  
146.97  
139.25  
136.62  
135.74  
135.59  
134.44  
130.28  
129.27  
129.08  
129.01  
128.27  
122.94  
121.86

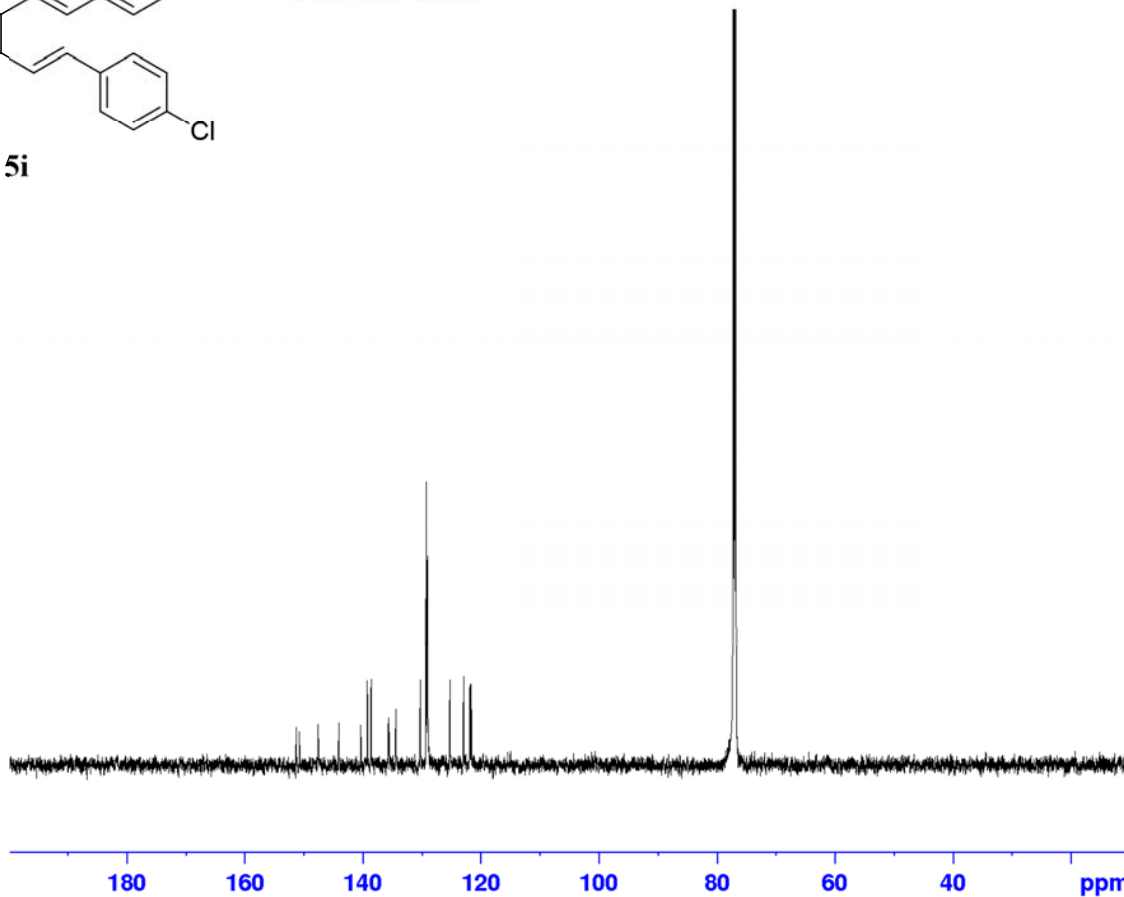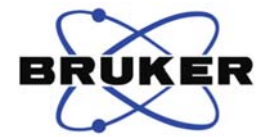

```
Current Data Parameters
NAME      JSZ3-16
EXPNO    2
PROCNO   1

F2 - Acquisition Parameters
Date_    20220606
Time     10.53
INSTRUM  spect
PROBHD   5 mm PABBO BB-
PULPROG  zgpg30
TD       65536
SOLVENT  CDCl3
NS       2338
DS       0
SWH      33333.332 Hz
FIDRES   0.508626 Hz
AQ       0.9830400 sec
RG       46300
DW       15.000 usec
DE       6.00 usec
TE       302.5 K
D1       2.40000010 sec
D11      0.03000000 sec
TD0      1

===== CHANNEL f1 =====
NUC1     13C
P1       10.00 usec
PL1      -1.60 dB
PL1W    136.15426636 W
SFO1    150.9194083 MHz

===== CHANNEL f2 =====
CPDPRG[2] waltz16
NUC2     1H
PCPD2    90.00 usec
PL2      -1.50 dB
PL12     13.20 dB
PL13     16.20 dB
PL2W    28.38507080 W
PL12W   0.96181160 W
PL13W   0.48204759 W
SFO2    600.1339008 MHz

F2 - Processing parameters
SI       32768
SF       150.9028076 MHz
WDW      EM
SSB      0
LB       3.00 Hz
GB       0
PC       1.00
```

<sup>13</sup>C NMR (150 MHz, CDCl<sub>3</sub>) for compound **5i**

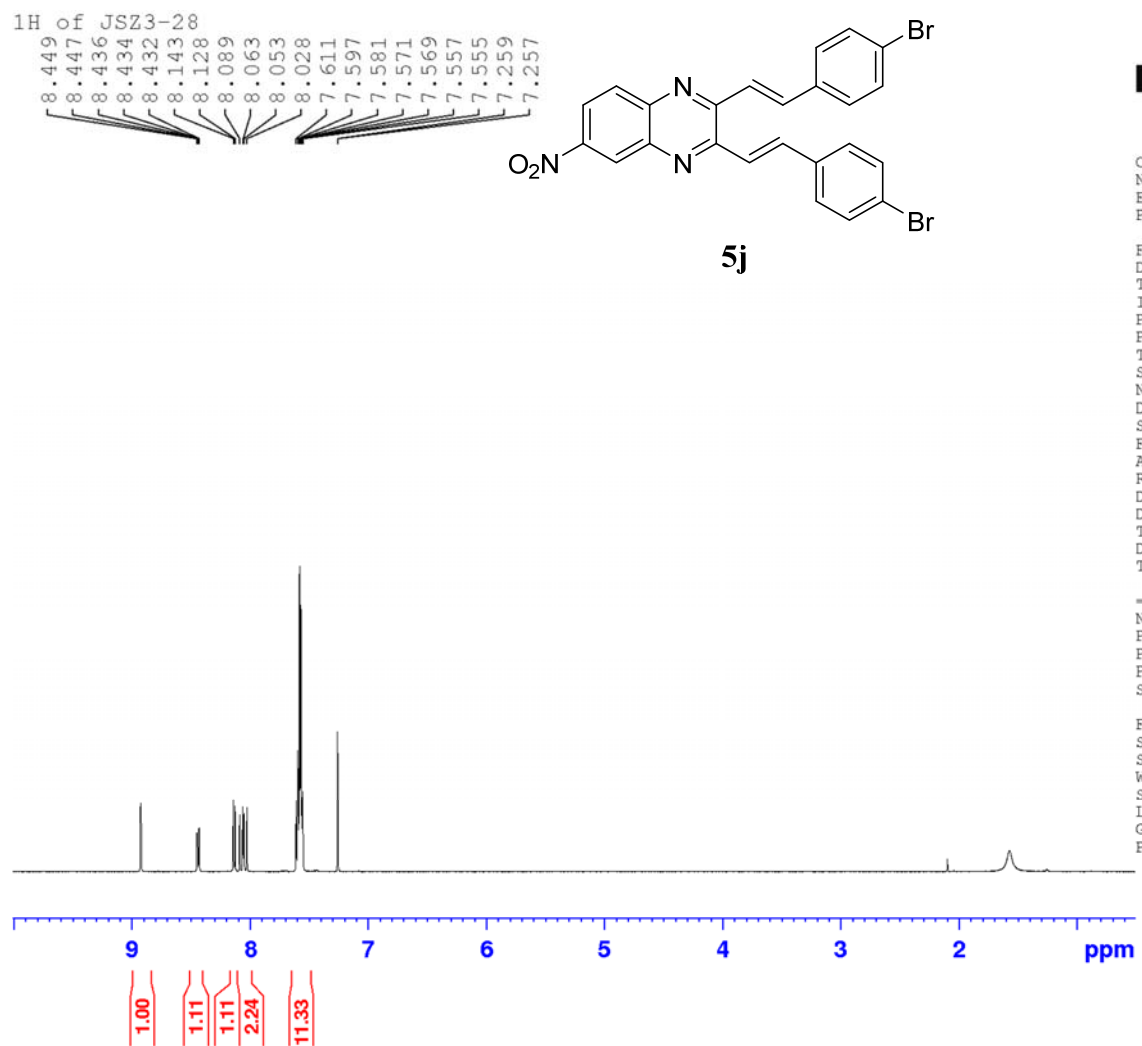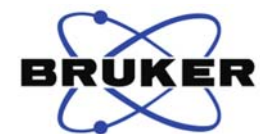

Current Data Parameters  
 NAME JSZ3-28  
 EXPNO 1  
 PROCNO 1

F2 - Acquisition Parameters  
 Date\_ 20220531  
 Time 17.18  
 INSTRUM spect  
 PROBHD 5 mm PABBO BB-  
 PULPROG zg30  
 TD 32768  
 SOLVENT CDC13  
 NS 16  
 DS 0  
 SWH 7183.908 Hz  
 FIDRES 0.219235 Hz  
 AQ 2.2806528 sec  
 RG 2890  
 DW 69.600 usec  
 DE 6.00 usec  
 TE 297.5 K  
 D1 2.00000000 sec  
 TD0 1

$^1\text{H}$  NMR (600 MHz,  $\text{CDCl}_3$ ) for compound **5j**

13C of JS23-28

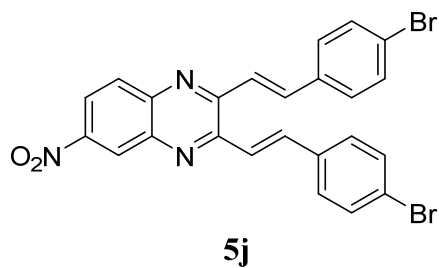

150.90  
150.38  
147.23  
143.67  
139.99  
138.93  
138.30  
134.46  
134.42  
131.86  
131.84  
129.90  
128.91  
126.85  
124.88  
123.66  
123.49  
122.57  
121.54  
121.34

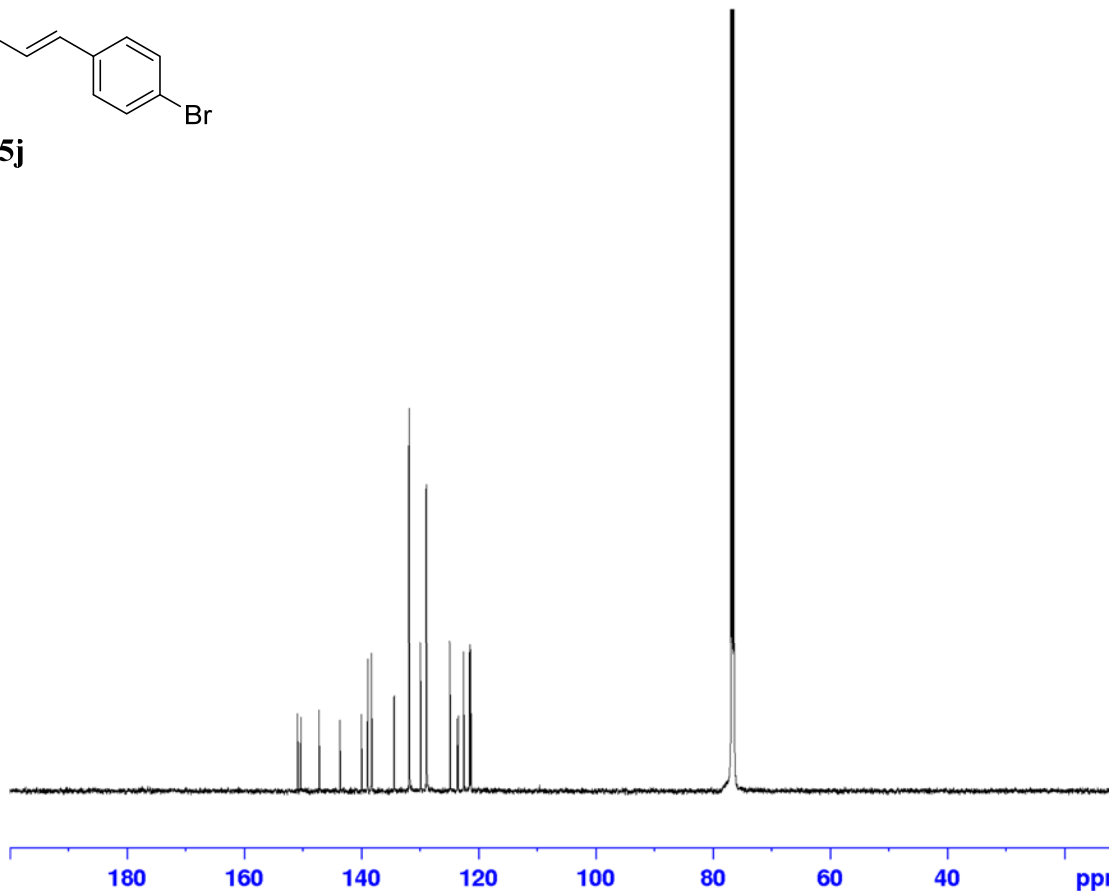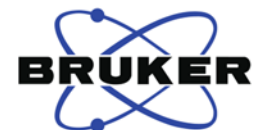

Current Data Parameters  
NAME JS23-28  
EXPNO 2  
PROCNO 1

F2 - Acquisition Parameters  
Date\_ 20220601  
Time 8.07  
INSTRUM spect  
PROBHD 5 mm PABBO BB-  
PULPROG zgpg30  
TD 65536  
SOLVENT CDCl3  
NS 15498  
DS 0  
SWH 33557.047 Hz  
FIDRES 0.512040 Hz  
AQ 0.9764864 sec  
RG 46300  
DW 14.900 usec  
DE 6.00 usec  
TE 301.0 K  
D1 2.40000010 sec  
D11 0.03000000 sec  
TD0 1

===== CHANNEL f1 =====  
NUC1 13C  
P1 10.00 usec  
PL1 -1.60 dB  
PL1W 136.15426636 W  
SFO1 150.9194083 MHz

===== CHANNEL f2 =====  
CPDPRG[2] waltz16  
NUC2 1H  
PCPD2 90.00 usec  
PL2 -1.50 dB  
PL12 13.20 dB  
PL13 16.20 dB  
PL2W 28.38507080 W  
PL12W 0.96181160 W  
PL13W 0.48204759 W  
SFO2 600.1339008 MHz

F2 - Processing parameters  
SI 32768  
SF 150.9028662 MHz  
WDW EM  
SSB 0  
LB 3.00 Hz  
GB 0  
PC 1.00

<sup>13</sup>C NMR (150 MHz, CDCl<sub>3</sub>) for compound **5j**



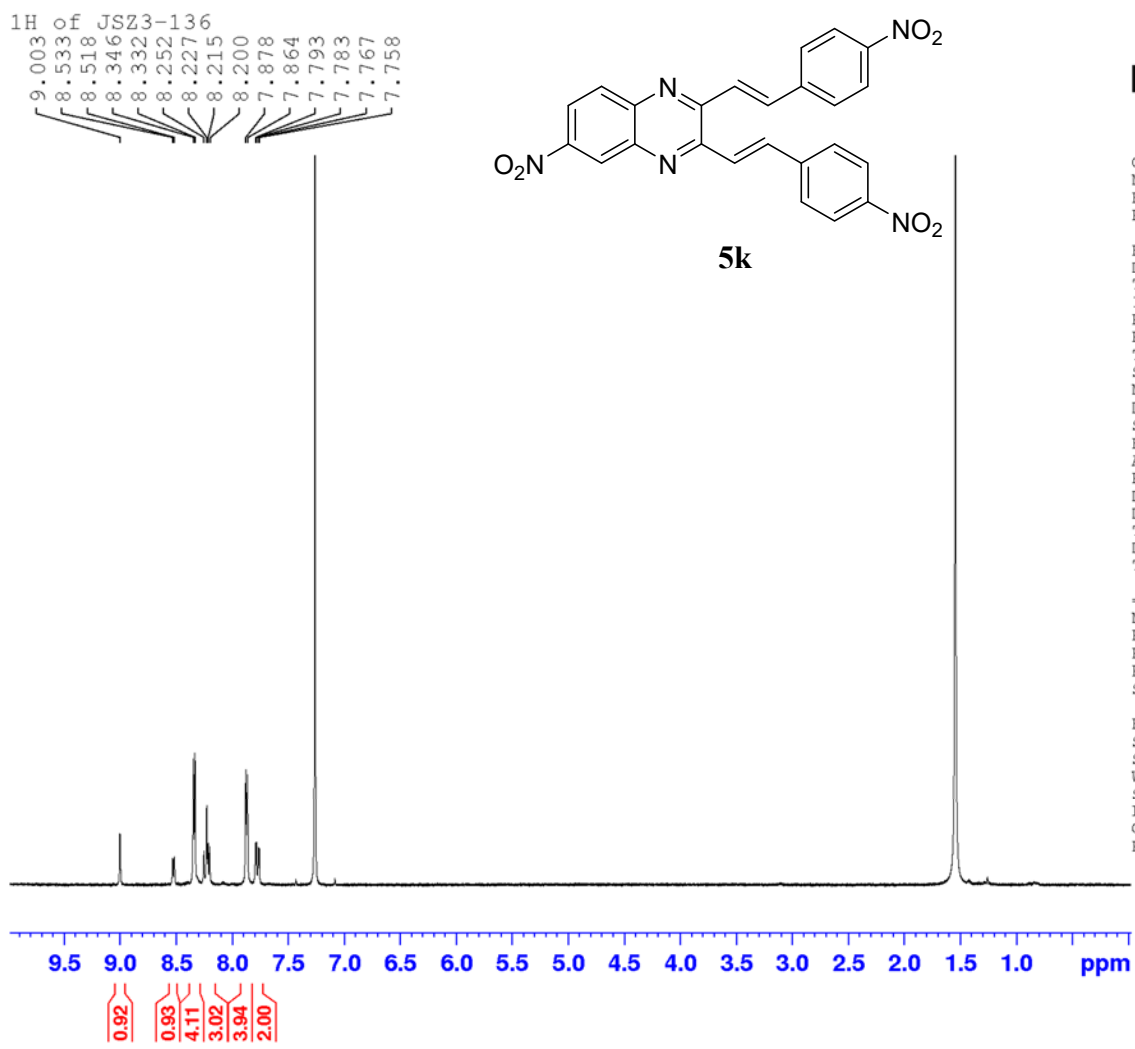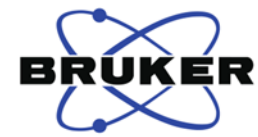

Current Data Parameters  
 NAME JSZ3-136  
 EXPNO 1  
 PROCNO 1

F2 - Acquisition Parameters  
 Date\_ 20220516  
 Time 15.27  
 INSTRUM spect  
 PROBHD 5 mm TXI 1H/D-  
 PULPROG zg30  
 TD 32768  
 SOLVENT CDCl3  
 NS 16  
 DS 0  
 SWH 6009.615 Hz  
 FIDRES 0.183399 Hz  
 AQ 2.7262976 sec  
 RG 2050  
 DW 83.200 usec  
 DE 6.00 usec  
 TE 300.0 K  
 D1 2.00000000 sec  
 TD0 1

===== CHANNEL f1 =====  
 NUC1 1H  
 P1 8.00 usec  
 PL1 0.20 dB  
 PL1W 19.19066429 W  
 SFO1 600.1330006 MHz

F2 - Processing parameters  
 SI 32768  
 SF 600.1300110 MHz  
 WDW no  
 SSB 0  
 LB 0 Hz  
 GB 0  
 PC 1.00

<sup>1</sup>H NMR (600 MHz, CDCl<sub>3</sub>) for compound **5k**

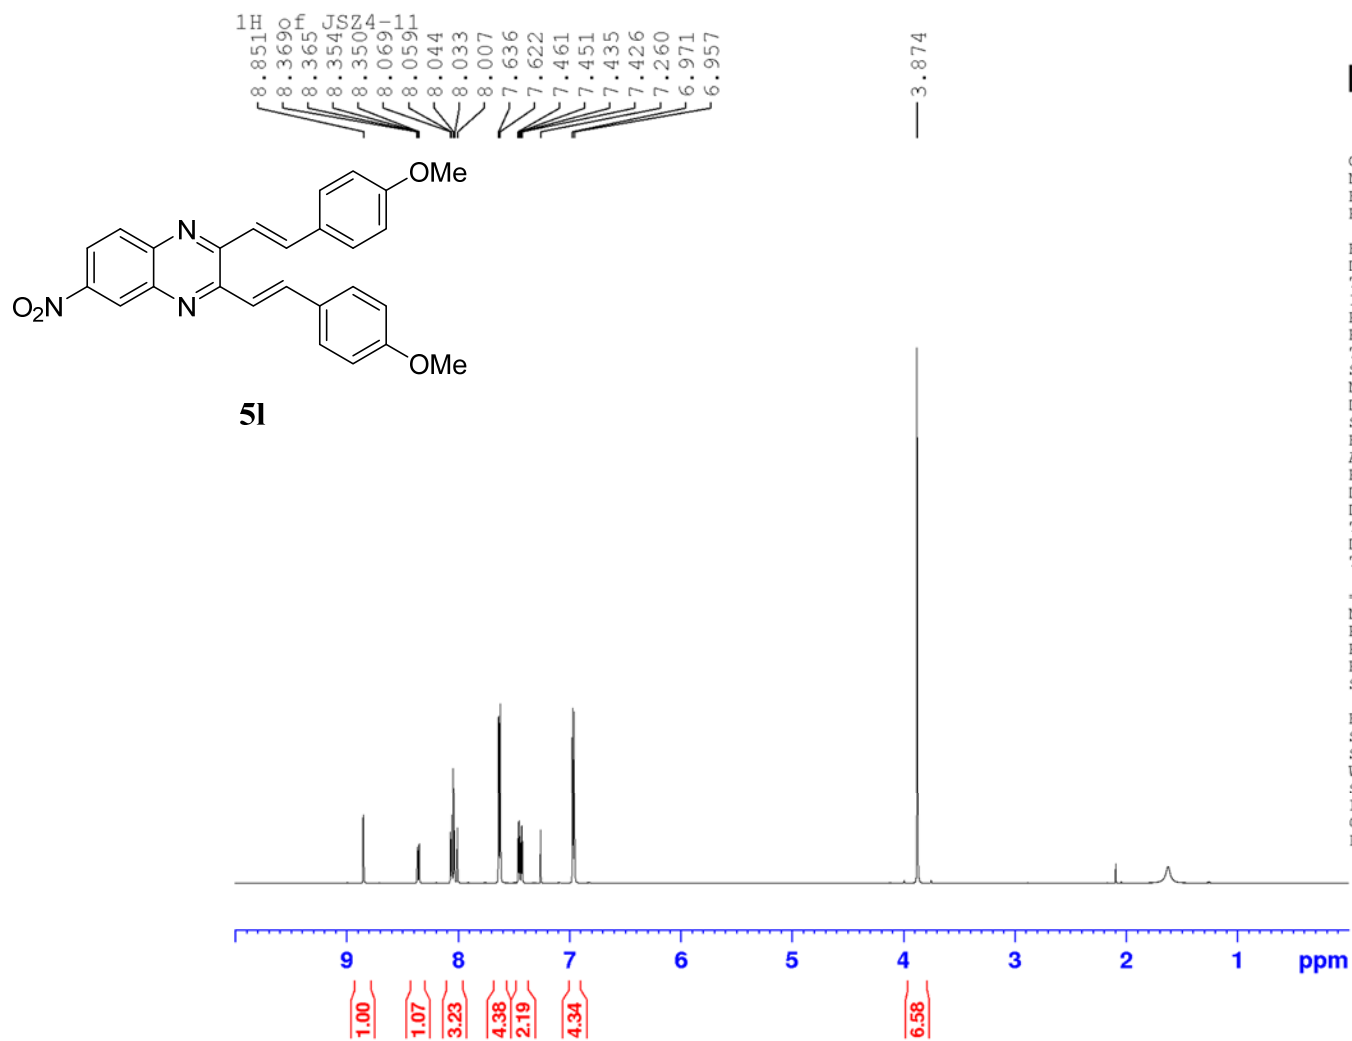

Current Data Parameters  
 NAME JS24-11  
 EXPNO 1  
 PROCNO 1

F2 - Acquisition Parameters  
 Date\_ 20220530  
 Time 13.36  
 INSTRUM spect  
 PROBHD 5 mm PABBO BB-  
 PULPROG zg30  
 TD 32768  
 SOLVENT CDCl3  
 NS 16  
 DS 0  
 SWH 6613.757 Hz  
 FIDRES 0.201836 Hz  
 AQ 2.4772608 sec  
 RG 1620  
 DW 75.600 usec  
 DE 6.00 usec  
 TE 297.9 K  
 D1 2.00000000 sec  
 TD0 1

----- CHANNEL f1 -----  
 NUC1 1H  
 P1 15.00 usec  
 PL1 -0.80 dB  
 PL1W 24.15961456 W  
 SF01 600.1330006 MHz

F2 - Processing parameters  
 SI 32768  
 SF 600.1300102 MHz  
 WDW no  
 SSR 0  
 LB 0 Hz  
 GB 0  
 PC 1.00

$^1\text{H}$  NMR (600 MHz,  $\text{CDCl}_3$ ) for compound **51**

<sup>13</sup>C of JS24-11

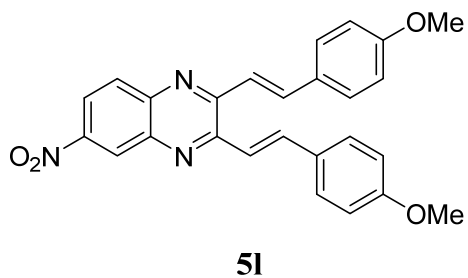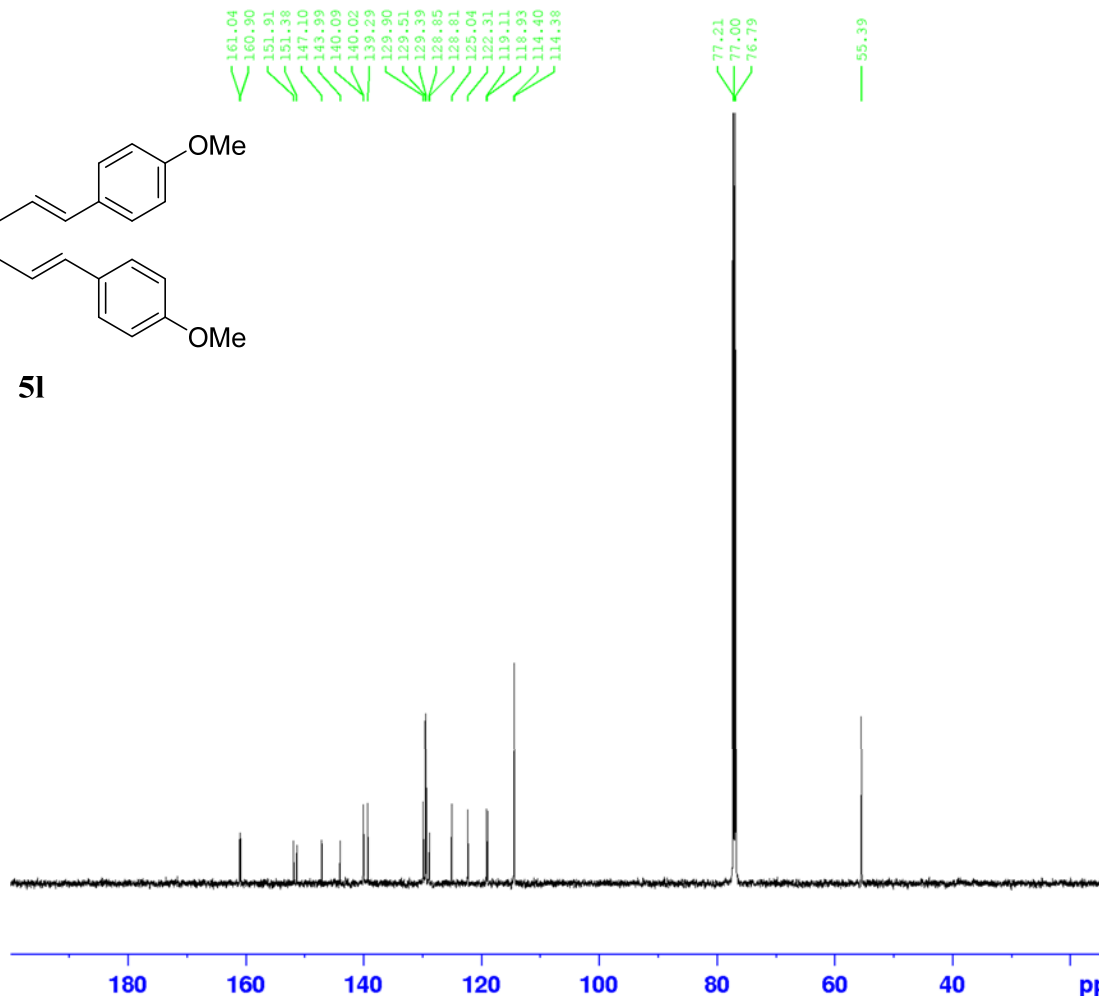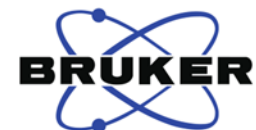

Current Data Parameters  
NAME JS24-11  
EXPNO 2  
PROCNO 1

F2 - Acquisition Parameters  
Date\_ 20220530  
Time 13.35  
INSTRUM spect  
PROBHD 5 mm PABBO BB-  
PULPROG zgpg30  
TD 65536  
SOLVENT CDCl3  
NS 355  
DS 0  
SWH 34013.605 Hz  
FIDRES 0.519006 Hz  
AQ 0.9633792 sec  
RG 46300  
DW 14.700 usec  
DE 6.00 usec  
TE 298.9 K  
D1 2.40000010 sec  
D11 0.03000000 sec  
TD0 1

===== CHANNEL f1 =====  
NUC1 13C  
P1 10.00 usec  
PL1 -1.60 dB  
PL1W 136.15426636 W  
SFO1 150.9194083 MHz

===== CHANNEL f2 =====  
CPDPRG[2] waltz16  
NUC2 1H  
PCPD2 90.00 usec  
PL2 -1.50 dB  
PL12 13.20 dB  
PL13 16.20 dB  
PL2W 28.38507080 W  
PL12W 0.96181160 W  
PL13W 0.48204759 W  
SFO2 600.1339008 MHz

F2 - Processing parameters  
SI 32768  
SF 150.9028121 MHz  
WDW EM  
SSB 0  
LB 3.00 Hz  
GB 0  
PC 1.00

<sup>13</sup>C NMR (150 MHz, CDCl<sub>3</sub>) for compound **51**

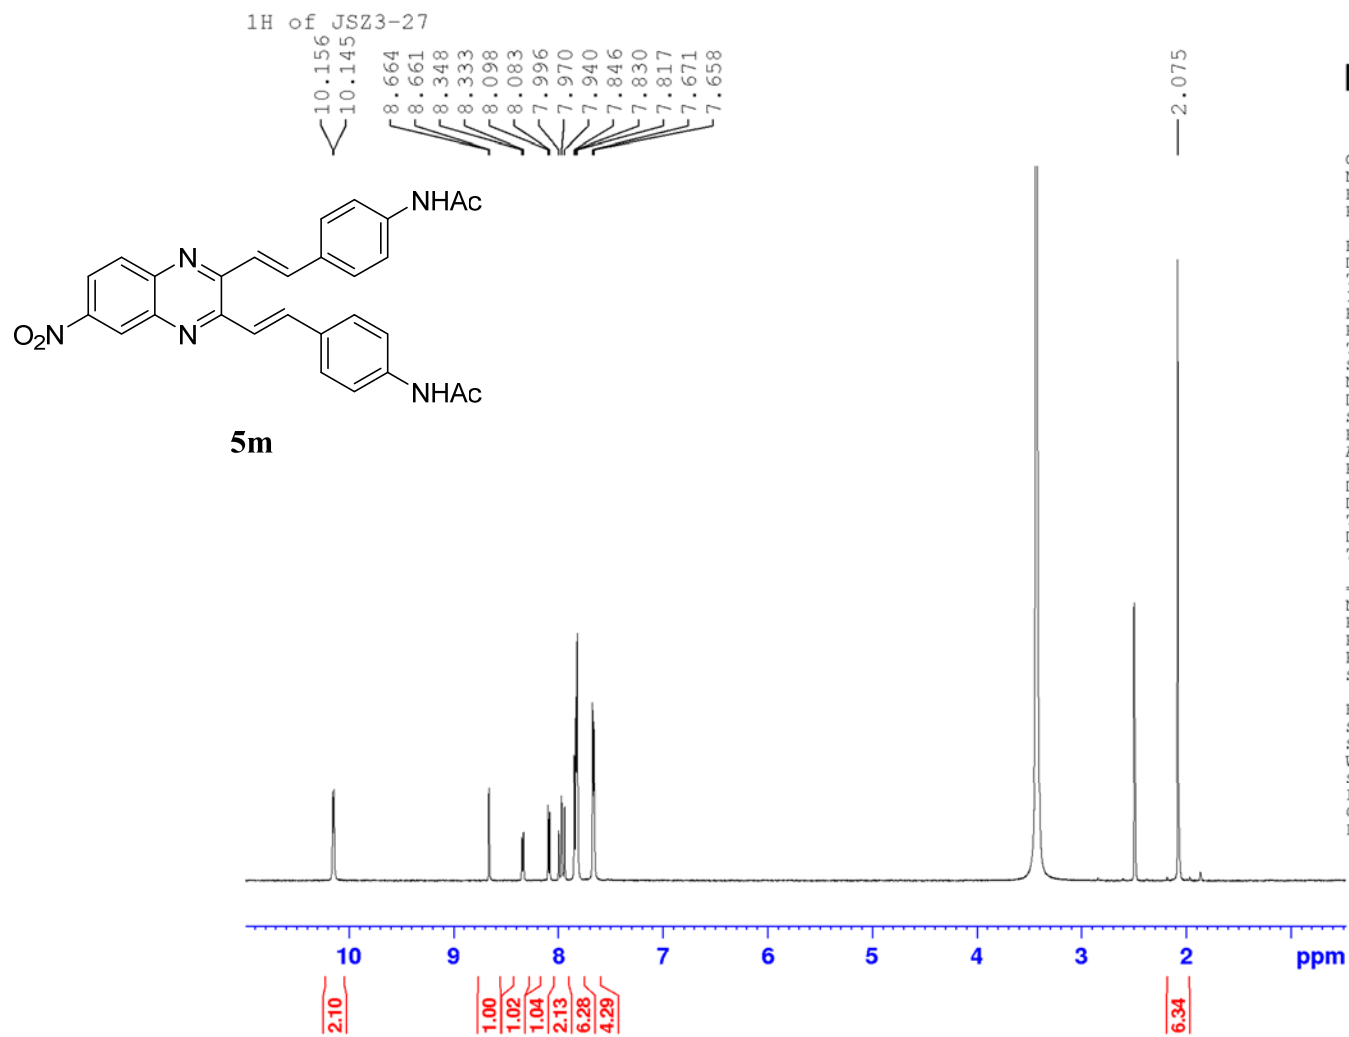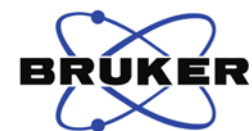

Current Data Parameters  
NAME JSZ3-27  
EXPNO 1  
PROCNO 1

F2 - Acquisition Parameters  
Date\_ 20220531  
Time 14.17  
INSTRUM spect  
PROBHD 5 mm PABBO BB-  
PULPROG zg30  
TD 32768  
SOLVENT DMSO  
NS 16  
DS 0  
SWH 7183.908 Hz  
FIDRES 0.219235 Hz  
AQ 2.2806528 sec  
RG 812  
DW 69.600 usec  
DE 6.00 usec  
TE 297.7 K  
D1 2.00000000 sec  
TD0 1

===== CHANNEL f1 =====  
NUC1 1H  
P1 15.00 usec  
PL1 -0.80 dB  
PL1W 24.15961456 W  
SFO1 600.1336008 MHz

F2 - Processing parameters  
SI 32768  
SF 600.1300064 MHz  
WDW no  
SSB 0  
LB 0 Hz  
GB 0  
PC 1.00

<sup>1</sup>H NMR (600 MHz, DMSO-*d*<sub>6</sub>) for compound **5m**

13C of JSZ3-27

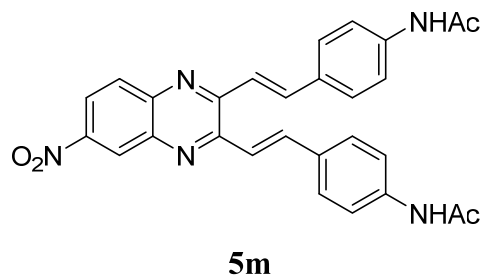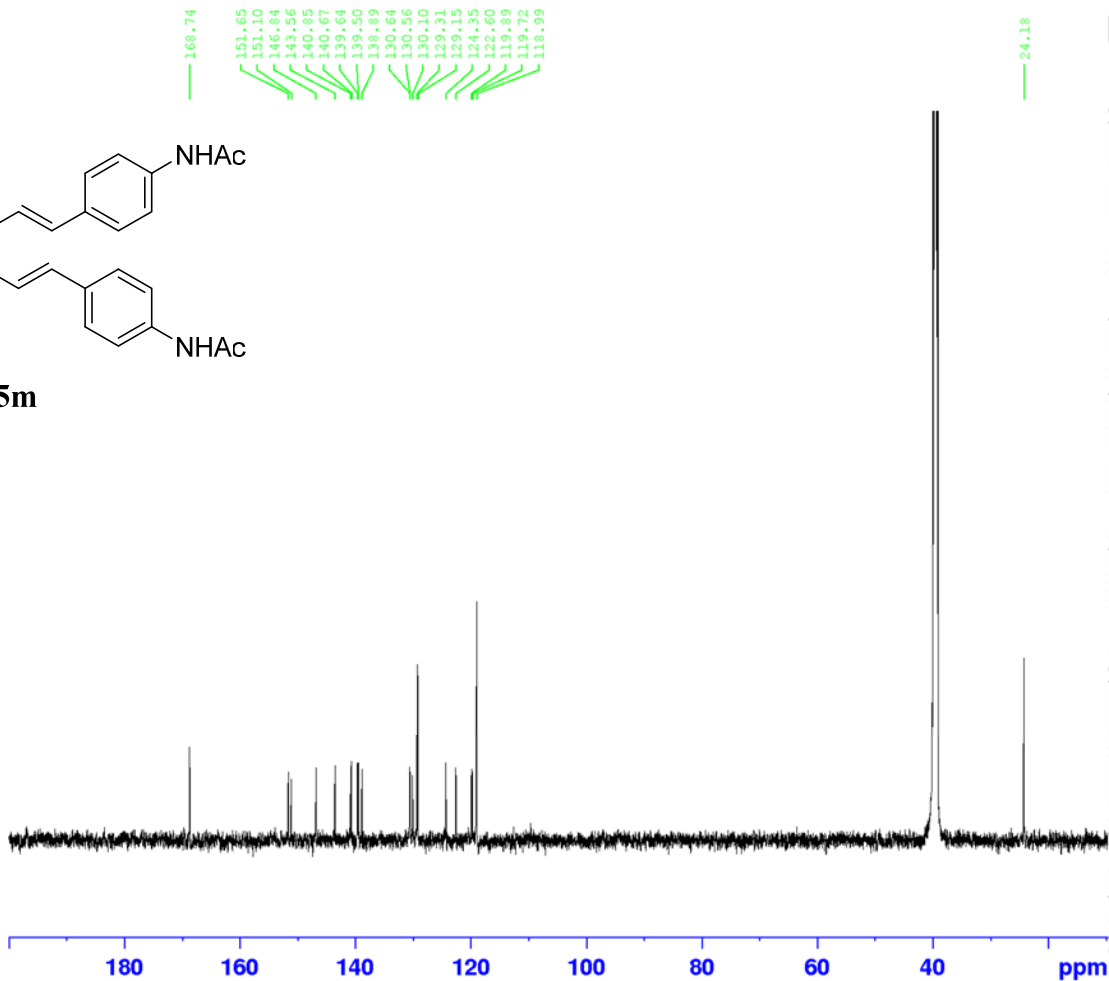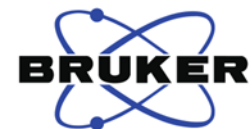

Current Data Parameters  
NAME JSZ3-27  
EXPNO 2  
PROCNO 1

F2 - Acquisition Parameters  
Date\_ 20220531  
Time 14.15  
INSTRUM spect  
PROBHD 5 mm PABBO BB-  
PULPROG zgpg30  
TD 65536  
SOLVENT DMSO  
NS 1080  
DS 0  
SWH 33557.047 Hz  
FIDRES 0.512040 Hz  
AQ 0.9764864 sec  
RG 46300  
DW 14.900 usec  
DE 6.00 usec  
TE 298.4 K  
D1 2.40000010 sec  
D11 0.03000000 sec  
TD0 1

==== CHANNEL f1 =====  
NUC1 13C  
P1 10.00 usec  
PL1 -1.60 dB  
PL1W 136.15426636 W  
SFO1 150.9194083 MHz

==== CHANNEL f2 =====  
CPDPRG[2] waltz16  
NUC2 1H  
PCPD2 90.00 usec  
PL2 -1.50 dB  
PL12 13.20 dB  
PL13 16.20 dB  
PL2W 28.38507080 W  
PL12W 0.96181160 W  
PL13W 0.48204759 W  
SFO2 600.1339008 MHz

F2 - Processing parameters  
SI 32768  
SF 150.9028662 MHz  
WDW EM  
SSB 0  
LB 3.00 Hz  
GB 0  
PC 1.00

<sup>13</sup>C NMR (150 MHz, DMSO-*d*<sub>6</sub>) for compound **5m**
