# Supplementary material for: Synthesis of quinoxalines and assessment of their inhibitory effects against human non-small-cell lung cancer cells
Source: Royal Society of Chemistry journal article supplement (doi:10.1039/d4ra04453c), 2024-01-01

(a)

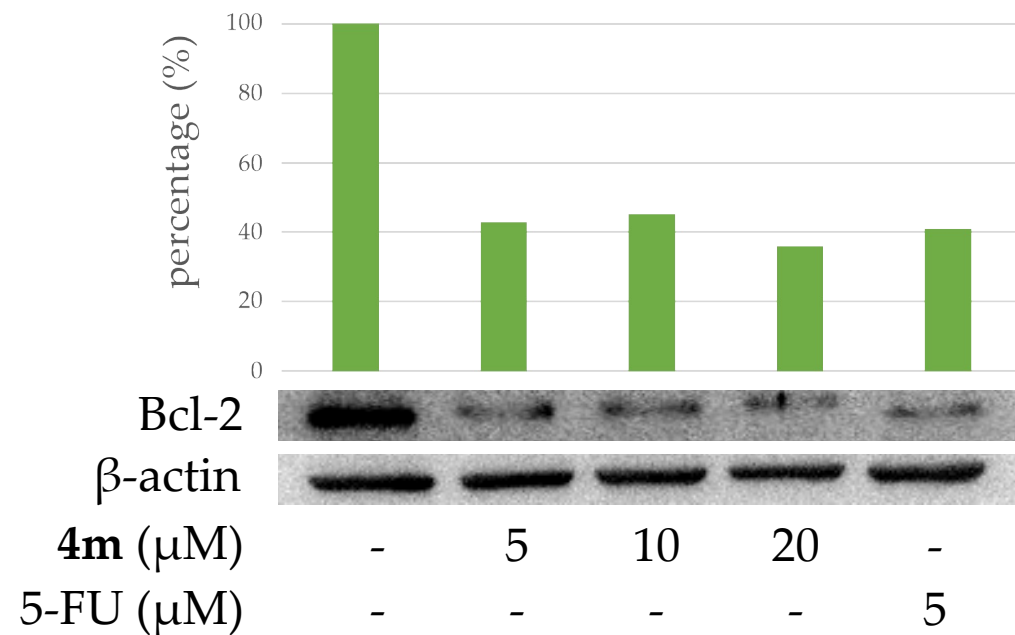

(b)

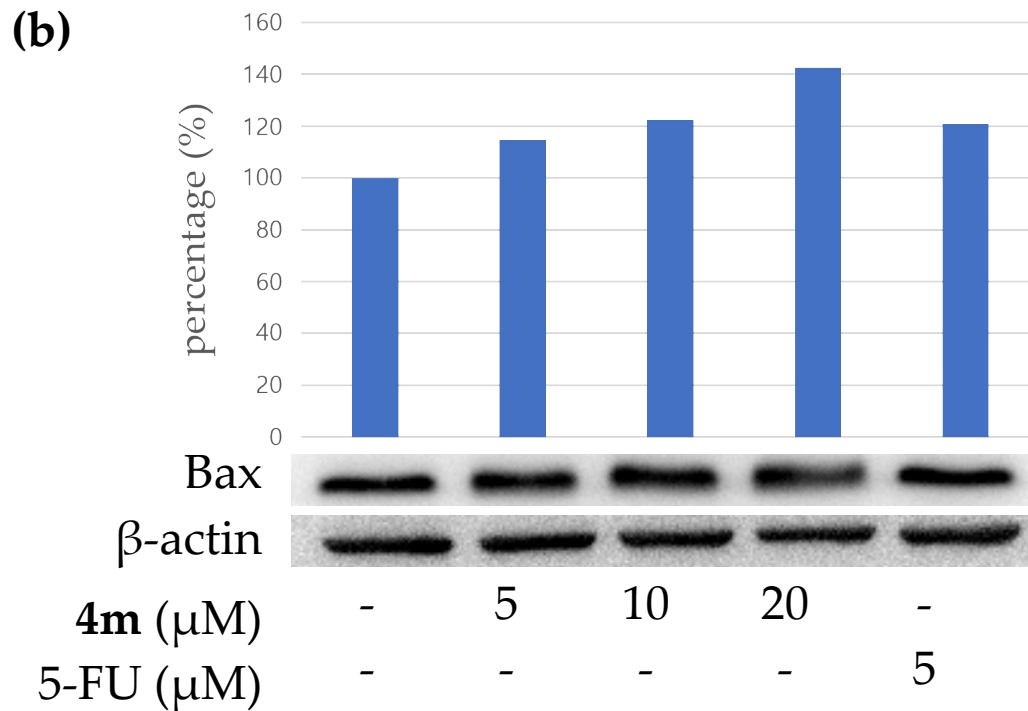

(c)

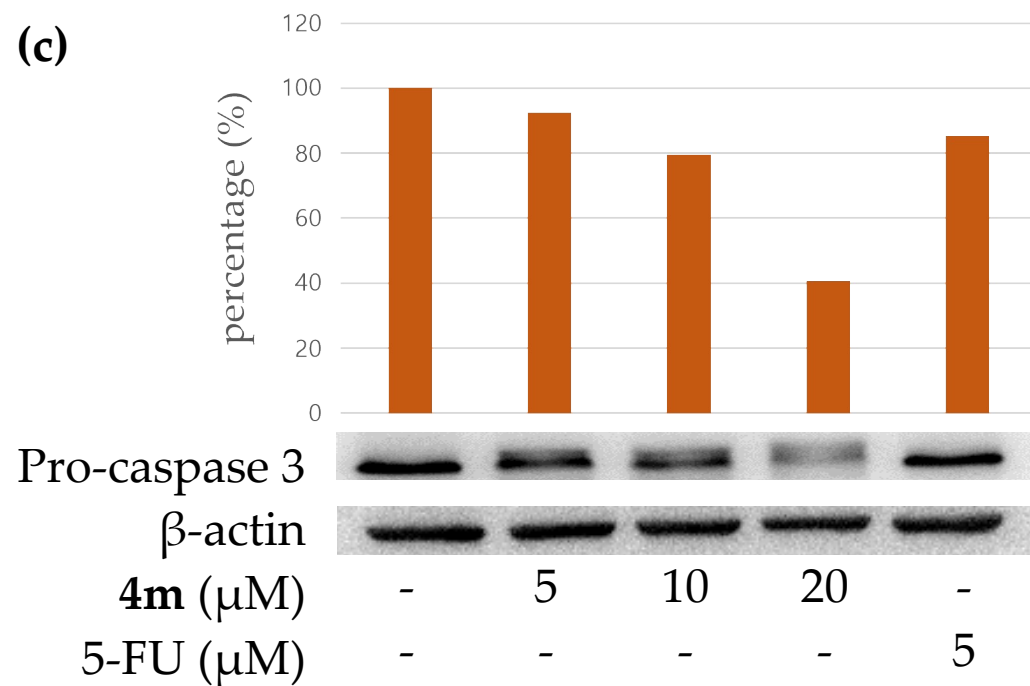

(d)

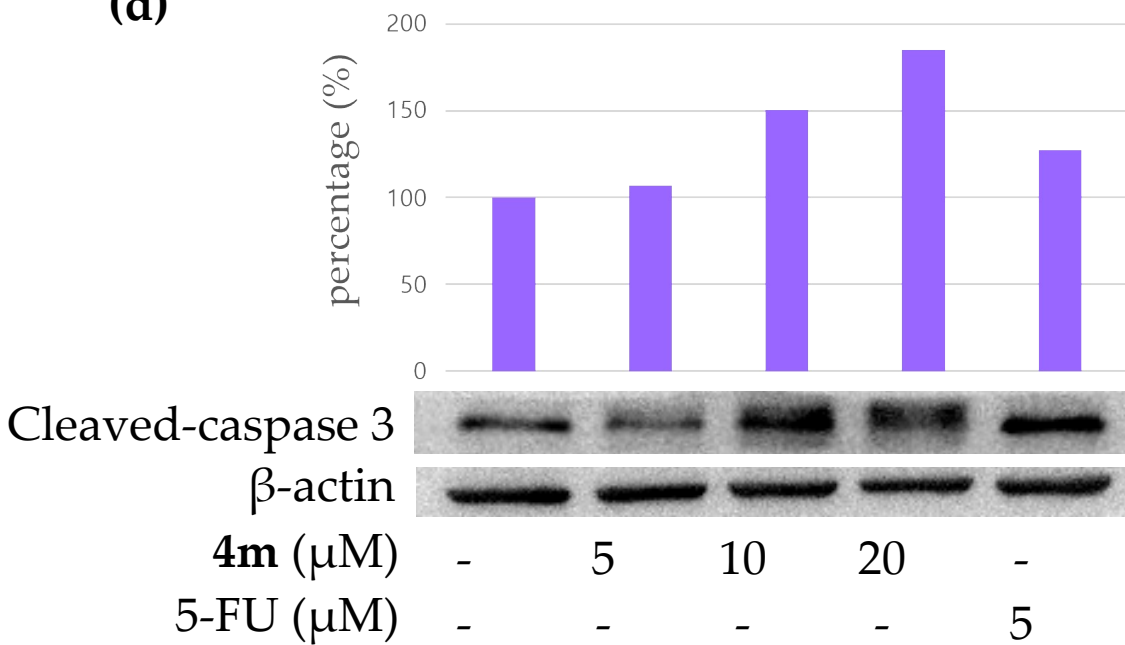

Raw data of Western Blot

(a) BCl-2

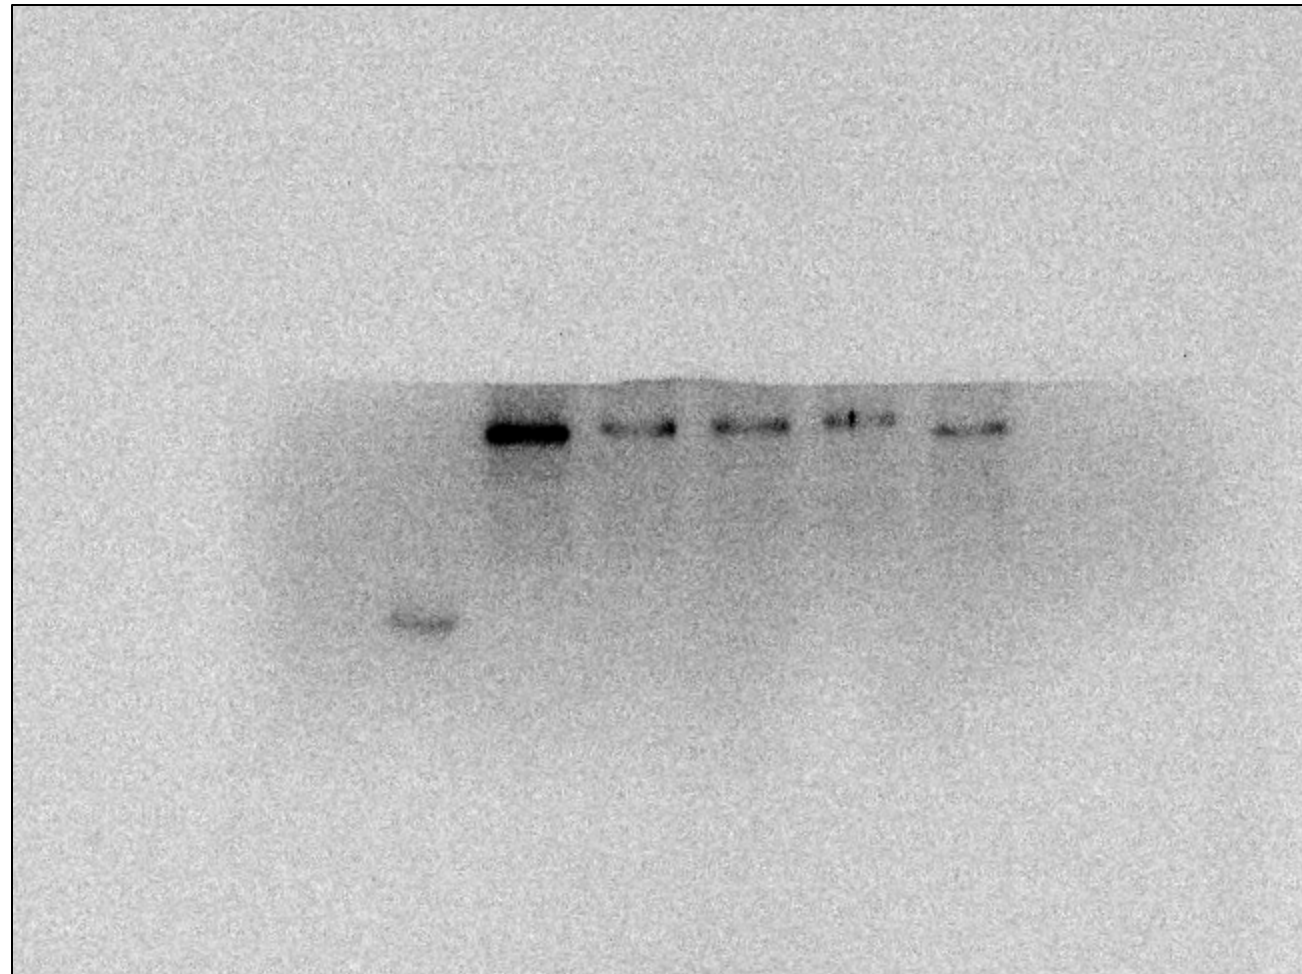

Raw data of Western Blot

(b) BAX

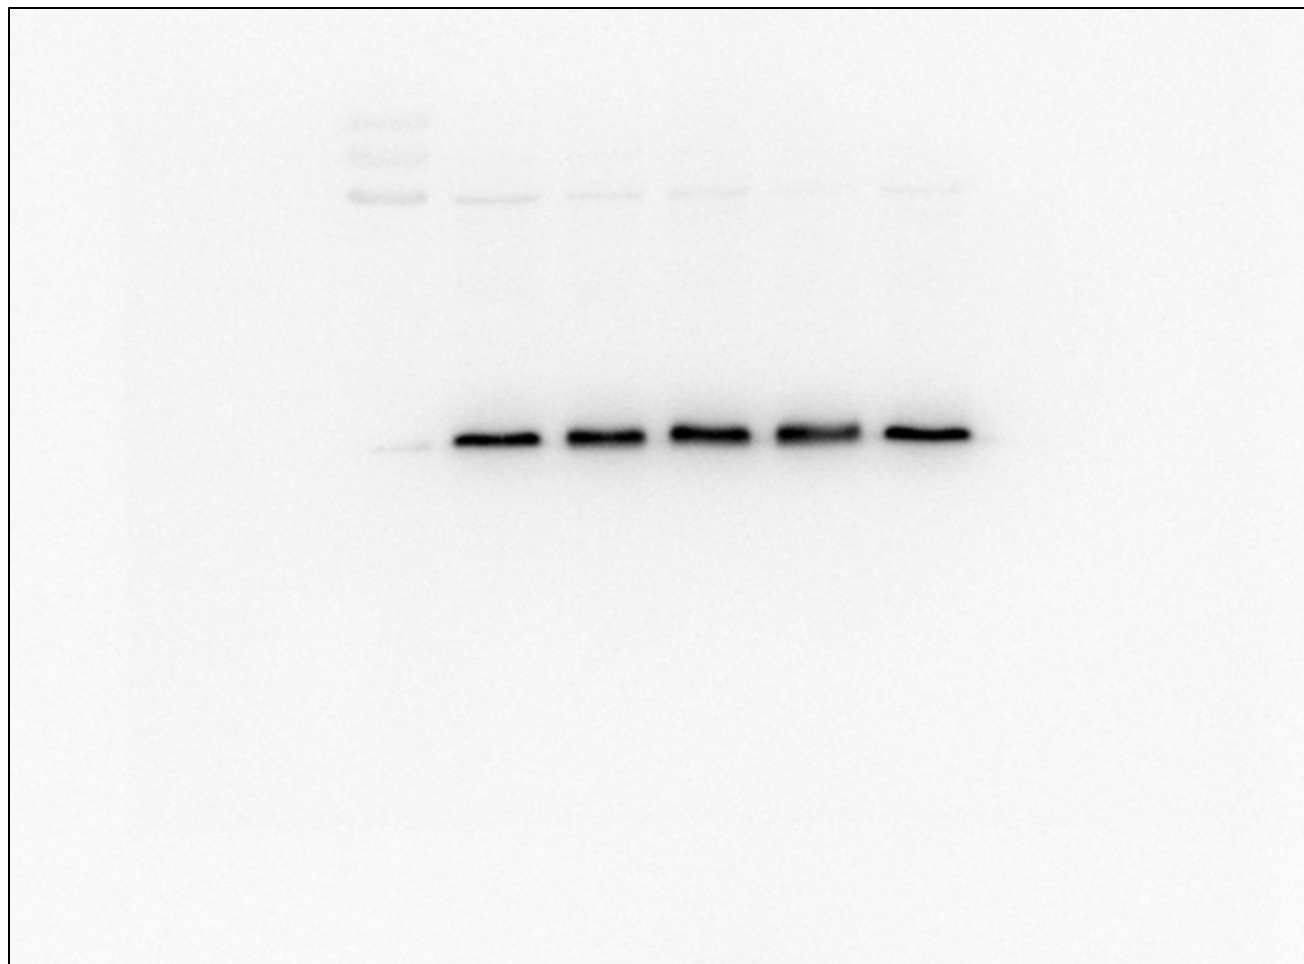

Raw data of Western Blot  
(c) Pro caspase 3

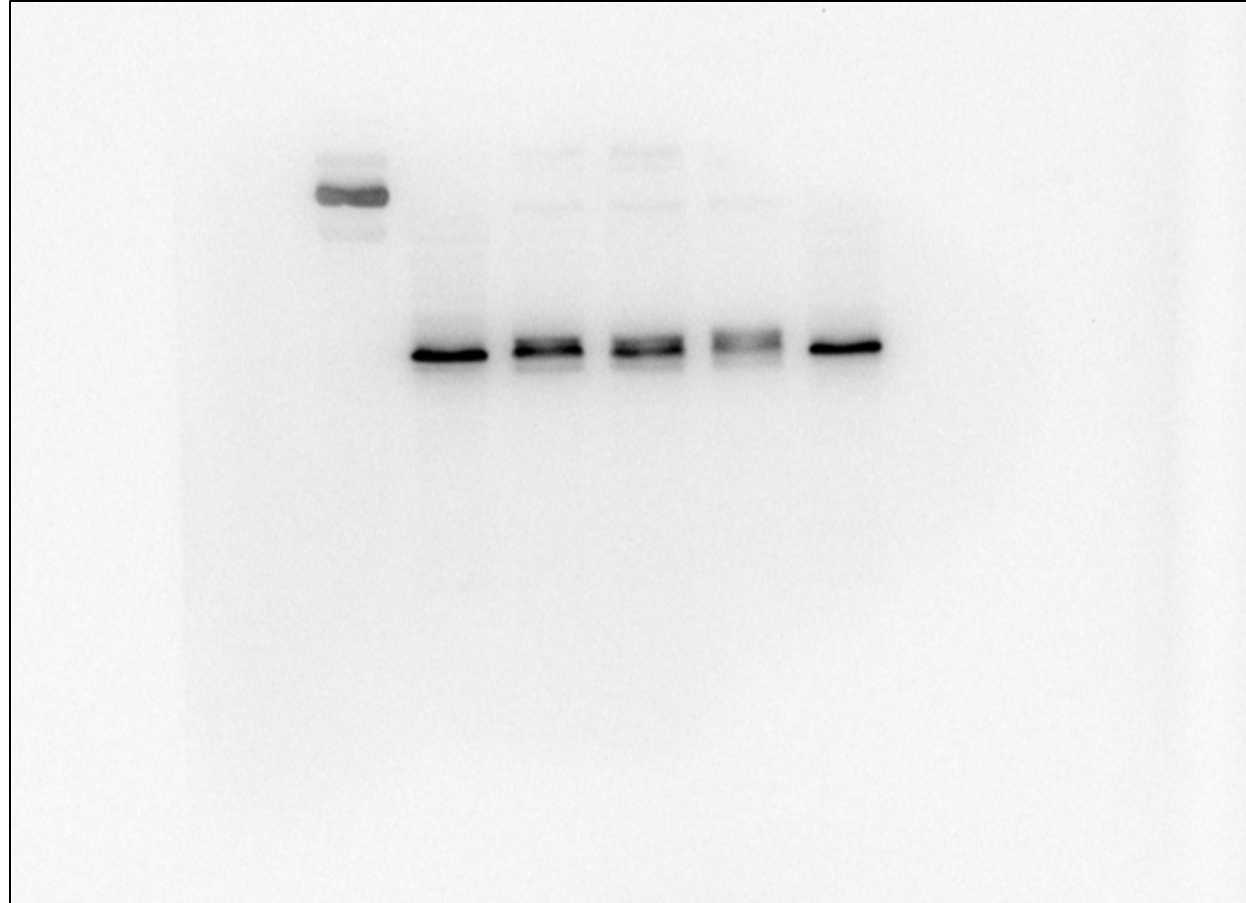

Raw data of Western Blot  
(d) Cleave caspase 3

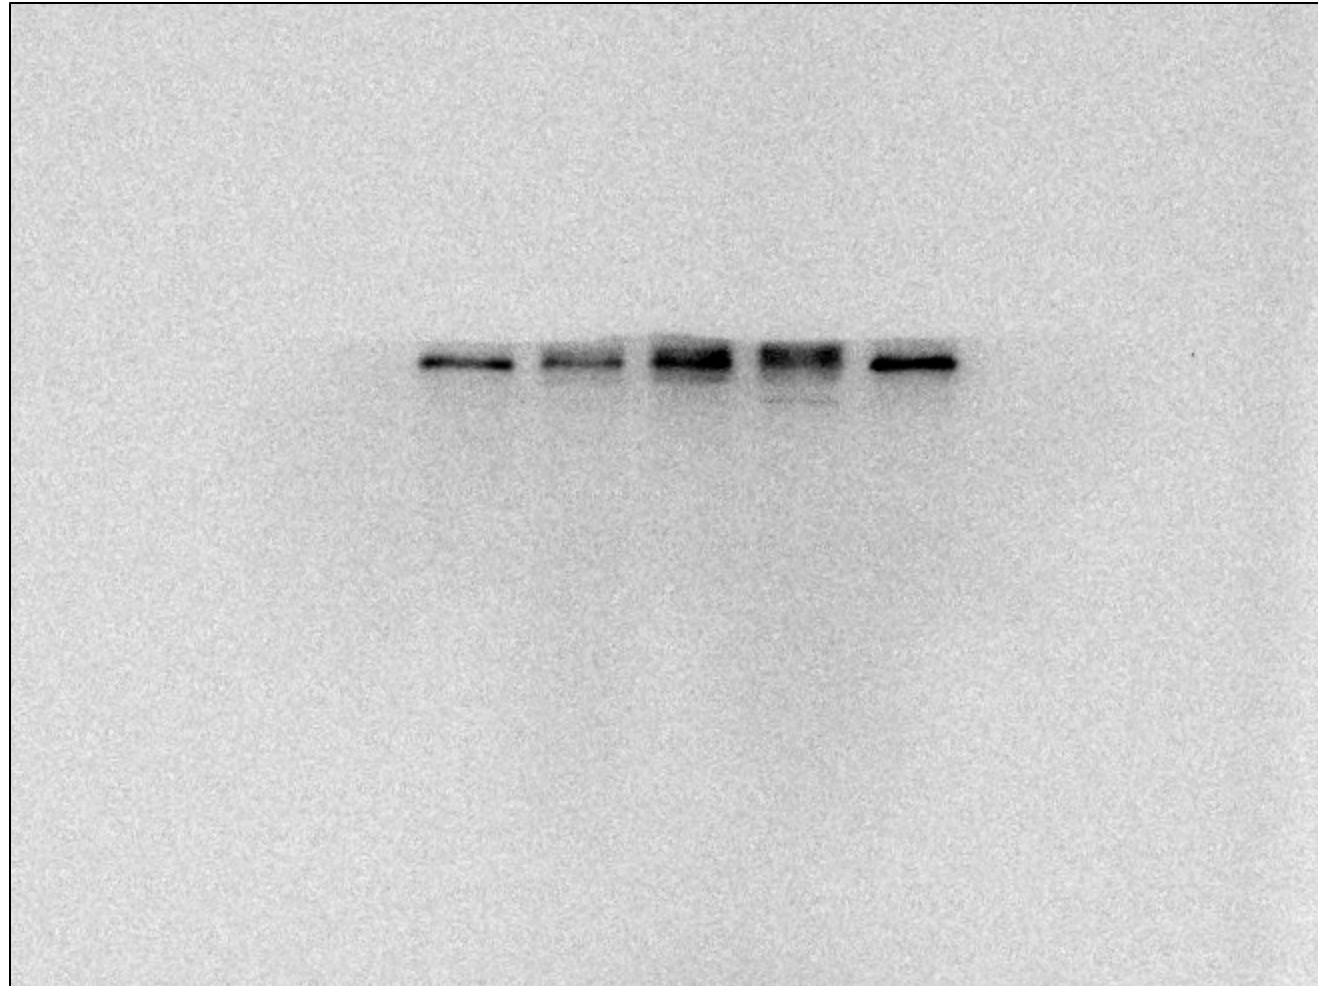

Raw data of Western Blot  
(e)  $\beta$ -actin

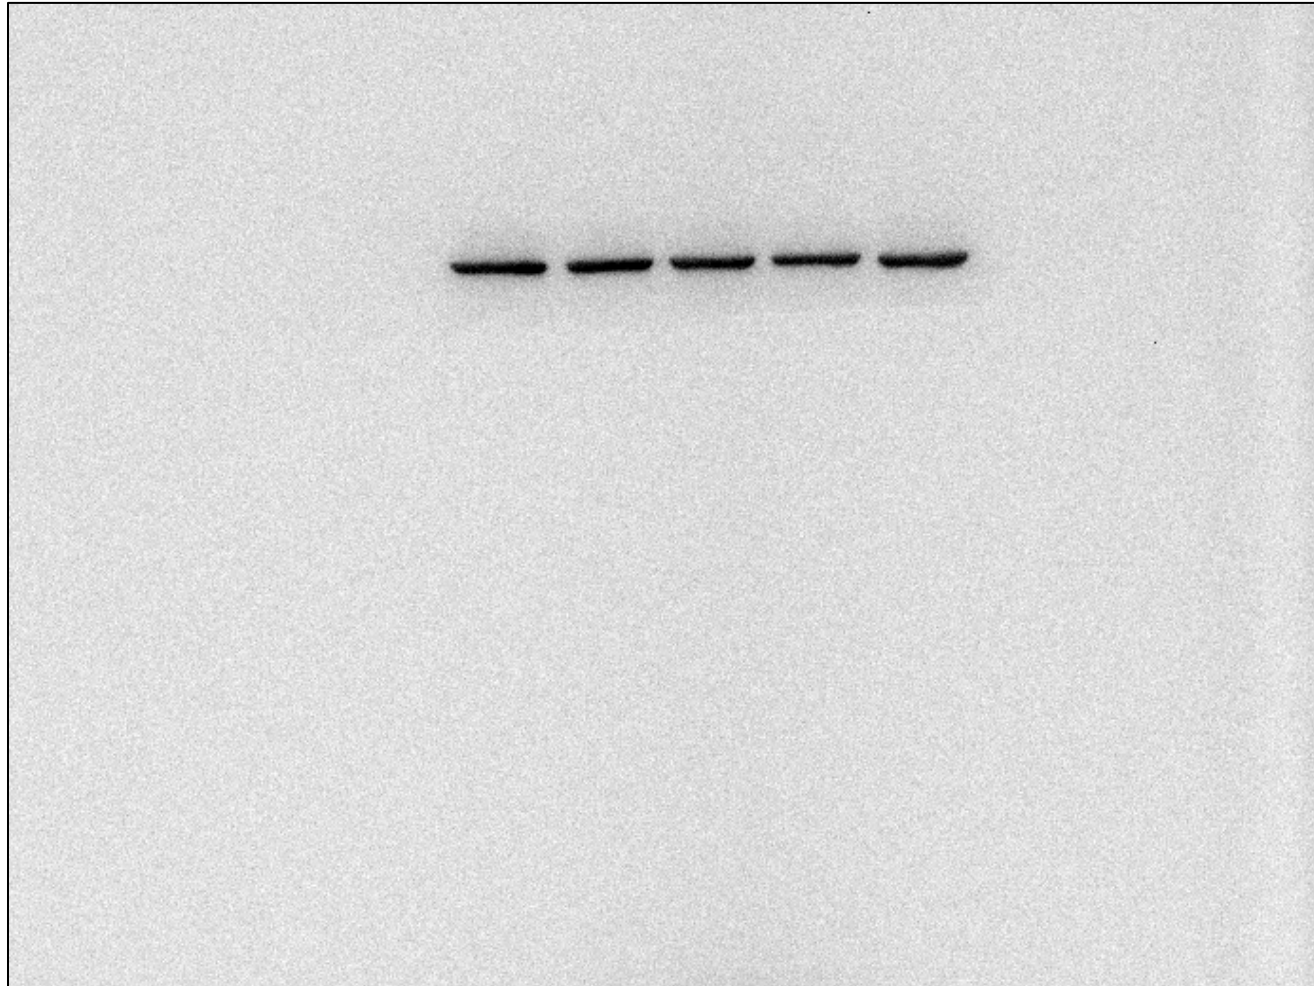

Supplement: d4ra04453c2.pdf [file d4ra04453c2.pdf]
